# Supplementary material for: Changes in rat plasma proteomes during the first week after birth
Source: Front Vet Sci. 2025 Feb 25;12:1440716. doi: 10.3389/fvets.2025.1440716 (PMC11894578; doi:10.3389/fvets.2025.1440716)
Supplement: Supplementary file 2 [file Table_2.xlsx]

## Sheet: Proteins for quantification
Uniprot Accession	NB rat1	NB rat2	NB rat3	NB rat4	NB rat5	NB rat6	FW rat1	FW rat2	FW rat3	FW rat4	FW rat5	FW rat6
A0JPJ7	7767.7	3872.97	4846.89	7304.58	8056.97	6216.65	6374.86	4011.75	676.926	78073.6	6573.56	6581.19
B0BN18	71592.9	43702.3	67280.6	38289.4	62029.9	143220	21425.6	3492.39	18311.1	310420	6876.06	55275.9
B0BNN3	767890	448465	288192	246596	1.54793e+06	456290	215914	96778	103632	3.60805e+06	109444	247274
B2GUZ5	20927.7	33662.3	37719.1	28335.2	26708.3	23067.4	14915.1	23102.1	28620.4	274090	35977.2	32485.9
B5DFC9	21740.6	25343.1	36157.2	43566.4	38748	23687.1	5456.31	14951.3	20627.4	99599.2	6207.1	27334.4
B9TQX4	4306.02	3782.3	24055.5	68869.7	48195.2	84396.3	22284.6	13123.3	21364.6	234406	27180.6	25585.3
D3ZHA0	18067.6	24466.2	21728.7	13099.1	9763.74	13032.7	24071.1	4630.33	8518.12	89234.7	8599.74	16777.1
D3ZTE0	285152	229821	275933	316973	203996	185472	377082	164603	509318	3.9996e+06	164266	431777
F1LMZ8	6353.39	2500.4	49267.6	8055.51	46407.6	6409.6	587280	284780	155067	1.04066e+06	17701.7	2284.1
O08619	42048.8	38009.5	39861.5	16720.4	6457.46	30989.5	99409.8	43855.2	47289.4	672538	48192.5	53474.6
O08628	41084.2	27818.2	26068.7	38048.2	43320.3	27950	18003.3	13430	28395.9	88828.3	8821.39	34594.7
O08770	35596.8	31491.8	9019.67	9423.33	50937.9	21483.8	6740.87	48902.7	63034.6	389516	97844.5	71602.1
O35077	4514.66	4262.89	5200.7	9257.76	4308.11	5306.97	7327.29	3960.24	5856.33	106663	9759.37	9825.6
O35112	13560.1	10010.9	4116.12	14750.2	11169.1	12741.2	12308.6	10187.5	11125.3	77238.5	10706.2	18448.1
O35217	68471.8	58524.4	61555.5	52301.1	83642.6	26291.5	110866	105756	109630	803551	201336	135061
O35244	24606.8	35811.2	34464.5	33501.6	58489.4	86927.9	13113.9	19430.2	26015.9	53103.6	31922.5	31066.9
O35567	31337.9	61584.1	37109.8	40141.2	85197.8	17202.2	16333.8	57649.6	32012.2	241089	36905	23215
O35568	44783.9	49966.4	43730.2	59701.4	32696.6	65338.1	30641.9	13859.5	24192	351680	20999.7	39493.1
O35763	26482.8	39877.2	29298.6	43628.4	55878.1	18177.3	20187.2	13709.5	17393.5	66663.5	15080.7	56187.9
O35814	19849.7	24778.4	10285.6	19155	51309.4	67833.2	9140.95	11696.8	30468.6	185386	5071.94	6168.27
O35987	10423.6	13072.5	29492.3	17743.6	32836.6	31263.2	12714.8	3366.57	13081.1	172216	8738.18	27274.3
O54767	59908.9	22165.2	89226.1	47735.1	135428	55070.4	50272.6	59771.7	818206	8.87641e+06	195219	18678.8
O54975	6471.9	12104.6	8316.31	12862.2	18438.3	7387.65	5219.93	5776.38	6121.34	12268.3	9729.76	7065.76
O55004	31011.5	33128.1	52564.6	57565.4	25343.3	53101.4	69753.8	56970.8	47944.4	607787	36037.3	74837.9
O55096	12625.7	20961.2	1353.65	30924.2	19421	4228.62	2170.04	20642.9	27753.8	110710	24108.3	15161.1
O70196	11487.9	32673.6	18027.3	21211.7	28340.4	6061.97	13048.3	30224.4	18061.7	194185	34664.6	29121.5
O70367	3672.8	14474.5	41483	18481.7	5265.42	26850.2	13739.9	15100	36407.9	1.02976e+06	6396.49	11110.4
O70513	46199.9	24798.1	10632.8	28074.6	46283.3	15085.2	54605.8	40202.5	41590.7	223032	104986	44976.8
O70534	125692	360853	431130	478344	188598	832187	47364.8	10627.5	42575.7	550338	16195.2	57649
O70535	8410.26	9163.59	980313	12970	230115	38097.5	11593.4	15560.8	163035	1.65359e+06	13720.4	16917.2
O70593	7994.24	10962.4	12006.5	14149.9	20637.3	5198.4	25745.3	4245.08	5808.31	110961	13293.4	16655.8
O88201	64743	42786.2	43233.7	35838.8	55680.2	29584.9	103036	34016.3	98573.9	2.31272e+06	34509.2	98252.9
O88600	30870.1	41272.6	19509.9	21280.3	57018.4	45588.1	17770.4	23029.3	30726.4	221489	34276.2	34632.6
O88761	10148.7	8839.3	14877.3	9912.65	34681.9	4207.82	80336.4	39937.9	25620.9	171791	9607.49	3674.42
O88767	48436.6	122145	99616.5	106141	109565	207006	13054.4	48212.3	49746.1	328328	81867.6	54793.5
O88797	4398.11	8627.51	11986.2	8838.91	5030.77	11750	3245.22	7104.83	5298.34	115681	11390.9	9252.89
O88959	37981.5	16776.7	24966.9	40362.7	23628	52741	5113.98	13844.2	20483.9	382074	22711.8	37756.9
O88989	52871.4	152502	88612.7	129523	132885	73556.7	40166	106144	79393.7	845073	118716	199924
P00564	395169	837908	838087	951818	932062	418927	185574	453950	795022	4461020	569039	1.064e+06
P00684	5977.04	32551.7	18093.7	17423.3	46726.8	32032.9	10915.5	11396.5	2904.97	97674.4	24956	14778.6
P00689	10390.1	17360.8	11534.5	17136.3	22765.1	20990.2	30208.3	37749.4	26749.2	262285	17553.7	32363.1
P00697	103183	76310.2	107398	117033	63633.6	60163.4	102459	82884.6	54128.4	60445.2	322775	87921.2
P00762	47697.3	26073.8	101834	171795	22694.5	41114.2	54325.5	116593	13884.6	1.79417e+06	10451.3	20682.2
P00787	110639	78690.6	93584	160722	192774	32604.2	139596	116936	163033	893158	112220	92431.1
P00884	29317.4	15074.8	102448	85477.2	2212	2445.59	18517.2	1456.64	20913	339333	29100.9	44384.2
P01015	1.01071e+06	1.3224e+06	497921	384737	861635	631992	1.47851e+06	2.22242e+06	2.02194e+06	22497542	2.5607e+06	1.78102e+06
P01026	15553110	17324920	19090420	17186710	17175644	10467775	17926274	29258126	29535676	127494224	46942836	21713560
P01039	81775.1	160656	52947.8	35400	44969.8	300081	37388.8	5805.5	138321	500580	14708.7	236983
P01048	10575453	10129102	13240132	9080058	7.91601e+06	20692392	7.24806e+06	1.73103e+06	5.55001e+06	314891264	3.30275e+06	6002877
P01346	185123	190032	298735	356319	200966	422098	144220	48511.5	235441	999704	181445	255313
P01681	25109.7	23056.9	9188.79	39109.7	26283.9	60838.9	40614.4	27393.1	54206.7	346107	137962	38462.4
P01805	81138.1	59439.2	111323	143619	19642.4	30530	38636.3	7970.13	133039	5.97328e+06	18047.3	33803.4
P01835	565449	710456	913824	722707	472373	356012	196846	1.96086e+06	1.51363e+06	5.56706e+06	2.55898e+06	1.10381e+06
P01836	455519	581782	481517	299630	234977	196313	621433	1.9684e+06	67780.2	5.55661e+06	392237	439646
P01946	63757040	72142720	68805240	67555832	134527552	59953060	17758190	3.22384e+06	9116198	131738736	4868858	28190596
P02091	18440246	11360956	17987522	13089267	22607480	24552070	5.05256e+06	1.71152e+06	2469025	50725732	1.54479e+06	7455595
P02401	16628.8	19342.7	17875.4	21143.9	44148.6	23062.1	22206.3	39790.6	12845.1	162050	3265.51	19616.5
P02454	238425	302575	626457	874891	349139	504019	505342	272794	577972	2602686	368559	516979
P02466	57711.2	53298.8	72203.3	93814.7	106712	50663.3	132492	150665	167569	1.25357e+06	343878	208216
P02600	48567.5	84479.4	52481.9	75010.2	72081.2	59427.2	34286.8	16369.3	46087.8	317965	63533.3	71435.2
P02625	17657	11524.4	10770.1	5601.05	11174.8	5723.16	32718.5	13268.7	11627.2	167472	15076.4	33959.2
P02650	5956963	6384075	12379703	8529561	3281174	5798264	14956452	15013856	18830918	207908768	7.21657e+06	19326272
P02651	1.14352e+06	1829798	895448	722230	1.65925e+06	1.79459e+06	2197009	2.4963e+06	2903627	57734376	4.08963e+06	3.40396e+06
P02680	4.95289e+06	2.92532e+06	5.5942e+06	3.56193e+06	185923	1.60024e+06	7220788	3.13283e+06	1262976	15639586	2207892	158622
P02764	16263.2	15080.1	18744.3	2660.12	19819.4	39162.8	22111.8	5402.29	30819.9	1.11387e+06	11370.8	24114.9
P02767	1.43141e+06	1.44158e+06	1.63359e+06	2.12107e+06	1.02781e+06	1.54321e+06	1.79597e+06	1.68371e+06	1.24727e+06	4.19664e+06	1.26951e+06	1312386
P02770	179238016	319159520	146264160	308591232	84043208	201276800	146484192	130984776	597570560	2056274688	550169728	463815936
P02773	33027572	36216016	82558440	39111840	47961876	24634546	37057320	35673224	55155156	329084864	83445112	51779428
P02793	71753.4	50173.4	32249.1	72395	128082	49909.4	13777.1	22005.4	13302.3	186065	22275.2	23251.4
P03994	13368.1	16048.5	14821.3	13592.3	11911.9	7105.45	28661.2	18572	8327.48	66269.2	4670.92	10487.1
P04041	125281	111853	76711.2	54338.6	241779	104986	13699.8	2914.21	19912.3	467112	10521.4	19016.4
P04276	752326	622421	1.775e+06	1.42323e+06	1.05331e+06	945115	1.42485e+06	780241	2.25194e+06	22727688	1.30313e+06	1.88188e+06
P04466	5335.26	9984.26	9482.25	8816.23	26217	6261.53	5243.84	4552	8612.79	43500.3	9774.98	7168.6
P04636	5329.07	6544.12	3914.46	6645.17	20992.6	18074.5	9532.67	1104.31	10155	51322.8	6416.13	13416.5
P04638	2.62386e+06	2.9909e+06	7.51851e+06	3.55301e+06	2.22571e+06	4731917	994719	1.96947e+06	1.00447e+06	8335481	1.22578e+06	1.39681e+06
P04639	2914825	4364257	3.81971e+06	4812148	3891308	3.81716e+06	3.994e+06	4.02708e+06	3704421	311840224	2.97887e+06	2.83026e+06
P04642	190877	328167	461202	373379	290669	307777	60037.5	84598.3	62190.8	251553	61413.1	245690
P04644	5728.76	4323.63	6128.23	6255.01	14168.7	10091.8	4870.75	4081.52	5096.3	64751.5	4903.59	9081.11
P04762	19204.4	21158.7	19973.9	30109.1	80750.6	33668	20779.7	3459.78	9199.89	94942.7	141954	10972.2
P04764	32937.4	40758.3	73408.4	52930.6	95711.5	59421.8	15553.2	20501.1	12661.4	430842	22639.7	34603.9
P04785	19903.6	13761.9	26934.7	22527.6	25610.6	18856.8	15245.8	16983.5	29140.5	469702	62934	41760.2
P04797	247949	516499	347074	528130	696312	744840	155229	150787	249927	933567	148113	527053
P04906	25622.4	38744.6	25492.1	30012.3	28209	12853.1	15739	25596.7	25892	298434	31234.6	23930.2
P04916	205976	138114	476225	382452	244840	323575	309546	566072	225419	3.41325e+06	472392	354736
P04937	6068531	3.53029e+06	3811718	3.05312e+06	5186935	1312068	5833707	5.63128e+06	3960287	30209636	7681648	4.65635e+06
P05065	173512	295504	203109	210414	396477	132752	85119.6	237510	145648	1.83916e+06	212118	232617
P05197	72180.7	96514	89559.2	100087	149266	128711	28977.8	14210.6	33332.7	396917	28790.5	67548.9
P05370	5820.52	5257.2	7794.32	10721.5	12898.5	16993	6715.92	4831.66	6333.61	77876.5	1553.55	12029.2
P05371	264555	360529	198342	231081	232578	151831	389868	674897	593674	13476868	811541	416640
P05539	20402.9	19201.1	20823.6	19912	38769.5	27186.5	19427.3	6204.58	35583	163802	15111.7	24206
P05544	3.8828e+06	2.82191e+06	3.11079e+06	3.98168e+06	2.23336e+06	4.13742e+06	1863420	1.66776e+06	1.22891e+06	11220591	688363	1.37463e+06
P05545	4068157	3721378	2.48754e+06	3079183	1.78437e+06	2.91581e+06	1.8055e+06	1.55676e+06	2.0262e+06	18135154	1237924	1071619
P05765	100297	95253	100140	119008	163014	634879	37959.5	24860.5	19438.4	248885	16931.2	96949.8
P06214	25090.4	20156.8	17263.6	27818.4	52072.2	20300.8	8726.91	6007.78	4871.93	85337.2	23333.7	6965.56
P06238	11787652	8749878	11372092	8.01085e+06	11608343	3335908	3725954	3.81018e+06	5234450	34060668	4761410	3755743
P06399	2.86728e+06	1.96058e+06	9355156	4.05441e+06	348923	3.25877e+06	4249361	688316	1.11795e+06	15466284	1.18503e+06	242750
P06759	9997.01	155294	17865	2079.01	95344.1	53792.7	257847	1.52984e+06	616283	309677	135963	79239.5
P06761	43838.3	52011	44482.4	54112.6	58424.5	17984.7	17706.4	6263.65	40215.9	376731	58738.5	42309.6
P06765	695718	532809	821119	743427	920605	577538	475889	377331	1.45371e+06	11810431	475332	880987
P06866	403765	276892	2.34204e+06	1.28891e+06	310221	808088	86414.8	53474.9	106465	1.07711e+06	55786.8	132878
P06882	11476.1	27162.9	22953.4	4637.65	13200.6	22367.3	31948.1	26703.1	25516.4	262469	61596.6	28066.9
P07150	11195.1	10330.2	17646.5	12287.2	13741.1	30900	5322.26	6460.9	11621.1	139789	10637.7	12700.3
P07151	607234	273712	1202384	717902	171331	1.21215e+06	854249	801488	784480	2.22431e+06	432105	1.07174e+06
P07154	35105.7	16530.4	50717.1	22179.7	240587	10412.9	11560.8	10233.1	15863	86146536	86594.1	10526.8
P07335	43247.3	133525	46164.5	92904	45932.2	26163.2	20302.9	39157.5	84537.7	341032	56476.3	87093.1
P07338	39196.5	15807.9	21133.7	7532.87	10558.7	5751.73	46282.4	26887.4	20584.7	161726	21803.3	13969.6
P07632	218927	363224	363720	306534	462475	1.82941e+06	60176.9	12842.3	59738.5	727111	32083.7	158332
P07808	120164	111198	86423	110372	61516.4	129315	89460.4	185968	286676	721192	195137	257299
P07897	7858.92	6452.08	10016.8	8584.71	4467.78	3647.78	3809.37	5227.66	3544.58	101593	15565.2	8461.7
P07943	39182.6	92679.1	55661	79179.3	28906.2	32505	26918	44682.3	66683.4	349963	92961.6	66337.5
P08010	3422.66	6224.8	4783.29	4985.77	4751.28	653.968	2606.32	4347.84	5027.01	93910.1	16245	12633.4
P08025	12776.6	10613.5	28826.5	35769.7	17447.1	76751.1	43135.5	10016.1	28990.1	413292	12803.2	59048.4
P08460	5398.7	8219.44	7132.29	4897.4	8547.01	5232.15	12529.3	9092.52	6857.77	83472.2	5861.25	8337.65
P08494	78799.7	93514.4	59496.9	119025	56859.2	211661	64983.9	107606	70060.3	112506	54247.6	55112.4
P08592	9309.5	6860.6	21405.2	8488.02	9889.3	7401.5	13536.4	20318	7932.8	115850	3575.51	4140.66
P08649	901181	833790	517631	486361	624366	659968	1.23312e+06	968308	1.59813e+06	12365698	868994	1.18e+06
P08650	55921.1	61319.1	52211.5	53738.5	35335.9	48253.8	82241.8	120706	74957.9	893725	38844.9	101367
P08661	83346.6	66638.2	71557.2	90087.7	68438.5	87770.3	200712	86888.6	248349	460128	99885.4	246164
P08721	38829.3	59624.8	12750.4	26430	43769.6	169975	18453.3	14935.6	19925.4	278814	2158.14	22776.4
P08932	18334176	18547064	21480900	14206408	14617361	18212176	18149958	3.37088e+06	14250854	219465248	10784016	22164276
P08934	874482	978808	968593	1.05328e+06	829690	1.0986e+06	884234	452024	1.13757e+06	11476668	569443	916524
P09006	3.67223e+06	3431847	1.43943e+06	1.27908e+06	2.62437e+06	1.19419e+06	2155840	1.2551e+06	2469908	20556076	925499	2.43682e+06
P09117	270638	494803	486212	327741	564958	133407	69607.7	289242	249264	4.17145e+06	421896	256787
P09495	18320.5	55684.9	87059.8	54337.7	37078.9	40486.2	13169.2	4689.78	4706.29	355852	8525.09	31508.3
P09527	2986.73	2754.95	27864	8485.86	11417.3	108264	31432.9	27646.2	25676.8	637603	44355.5	4413.02
P09606	4978.92	16481.7	9823.33	17229	11973.2	12095.4	8379.82	10204.2	9810.26	76241	12469	7299.49
P09739	1281.39	10309.1	7129.18	7883.96	21500.7	17090.4	8514.44	4341.64	13590.6	77726	3022.26	6900.6
P09812	10606.1	8671.61	6547.75	6741.99	11251.6	8507.38	6465.74	1985.48	6560.47	73834.1	1833.69	9802.14
P0C0R5	18991.7	313588	1.52012e+06	45344.3	225737	20181.8	23234.8	2999.53	38864.3	8.20978e+06	71957.7	397827
P0DP29	10486	25566	13788.7	10447.9	36690.2	7586.52	18042.2	13562.3	9843.21	83082.8	13806.6	1542.77
P10111	169612	331657	224470	239200	468789	446376	56838.5	165713	371205	782525	152737	253866
P10252	11624.3	13324.3	10135.1	12810.3	16706.7	7084.92	8604.48	18063.6	13839.8	46039.9	25696.5	13781.5
P10354	13378	10158.5	7489.48	14789.6	86252.3	3797.46	4463.44	49465.1	44591.5	2.87797e+06	70096.2	14968.9
P10719	2704.9	9456.85	8199.85	10859.8	22352.5	33570.6	11100.6	19634.7	47464.2	1.33846e+06	20524.3	15965.5
P10760	10074.7	31249.8	72419.7	30249.3	21711.6	2816.05	35071.6	65155.7	18963.3	363896	29763.5	8562.85
P10959	14650	7143.52	13378.5	4350.16	3626.88	82099.5	144213	125747	137060	1.55022e+06	37656.9	64072.6
P10960	403940	26214.8	597462	2.26819e+06	39910.3	33034.7	436544	45438	26160.1	8529372	31613.4	553884
P11030	63383.9	105968	145520	80660.7	108087	196799	26937.2	13771.8	28138.3	84126.6	16113	50569.1
P11232	195784	187631	222909	196919	354545	255187	36883.8	18566.7	34168	143511	20193.8	112395
P11442	11583.7	9736.03	83785.7	19332.4	22144.9	22697.9	11403.1	5797.3	8290.99	168859	26923.3	18059.4
P11517	27544446	29365988	23466244	18066396	44056120	38429224	3.43006e+06	742323	2.96321e+06	39378236	968932	5601884
P11598	11325.5	17405.1	12872.7	23468.2	13757.9	9505.24	8957.4	20199.5	11011.5	161607	48751.3	20129.3
P11762	31275	63217.7	98911.9	72483.3	34558	255516	30444.2	7144.47	29420	261374	18125.6	50002.9
P11980	82418.8	127575	114677	112192	76631.3	79242	52012	89269.8	110485	790600	106238	124054
P12001	1038.31	20641.4	15820.8	33185.4	63482	128966	12373.1	2037.26	10968.2	234701	10372	16529.6
P12346	29042904	30530434	45402596	43022464	29493450	20561176	41669496	20350980	58886768	621076480	14340395	49034748
P12785	7734.23	16800.8	11870.5	16478.7	17611.9	6014.86	3246.52	15393.7	9768.44	30188	13056.5	10608.9
P12843	1017808	957195	1.42481e+06	1730234	999248	3.1961e+06	762747	152786	491741	1.03079e+06	307470	879998
P12928	65769.7	65269.2	35020.4	74047.9	197994	86036	33052.3	16171.3	2120.65	5.72004e+06	31024.2	10840.1
P13221	17131.1	26525.9	18265.9	18482.7	27904.7	24920.3	8604.27	13061.2	25901.5	136715	40473.2	26448
P13596	26072.5	39195.6	10223.1	32669	47512	39091.4	65913.4	34686.8	40291.8	502561	22579.8	59808.9
P13635	1.34773e+06	1.67429e+06	971913	873339	706092	691676	1.54329e+06	814613	2.23172e+06	11618310	1.07429e+06	1241609
P13668	37746.7	135087	95455.8	93175.4	139681	311764	11633.4	27213	21730.2	281148	36946.3	61107
P13676	13715.2	16074.1	6125.58	13155.1	56660.9	25811.1	24525.2	11805.5	5507.08	96572.6	25503	8407.32
P13697	12577	27348.8	15888.4	34044.7	29593.9	28248.5	25229.9	3613.89	28057.3	256112	67278.7	32762.3
P13852	8772.71	13977.1	9453.65	19385.3	14583.1	17898.7	2839.01	10104.3	9961.38	79742.9	13255	8481.44
P13941	100287	105736	60008.5	120507	115277	57851	130781	63518	186208	554570	70055	168970
P14046	2.35391e+06	1.69768e+06	2467211	2.50288e+06	1.62935e+06	5.6571e+06	3264710	1.67831e+06	5169510	58073324	1.78316e+06	2.31894e+06
P14141	175414	297337	461597	312411	429784	152019	80884.1	97681	278995	1.57665e+06	157787	485478
P14272	389298	420585	553053	433317	358361	265872	682732	663221	965371	6019059	405523	804826
P14423	48627.9	34779.2	17461	47487.3	30178.9	31524.8	19326.2	4692.08	71505.4	572988	15645	13473.4
P14480	3.50584e+06	1.94628e+06	10347205	3.92815e+06	150314	2.37417e+06	7.70812e+06	1.41173e+06	1.0991e+06	15237449	1.09657e+06	175186
P14630	528017	526559	1.87863e+06	1.2e+06	592188	450727	1.3031e+06	1.54673e+06	1.7746e+06	21239030	1829496	1567296
P14668	12548.9	4547.26	27074.5	16787.7	8475.15	84448.9	60144.7	5063.75	38559.9	535684	16207.1	164634
P14841	494775	634739	961638	727852	572244	706570	433538	109485	292959	920654	238795	410827
P14925	13563.7	9350.64	1524.59	7126.31	11445.3	10332.7	21156.7	7203.18	21942.6	121671	7064.42	20628.8
P15178	25382.1	31217.5	18965.6	23356.2	23142.1	21208.9	4857.85	995.686	2795.77	30672.2	12662.2	15801.7
P15429	70691.8	130938	83567.9	147807	172843	46815.2	14877.1	50705	74458.1	400459	135583	146118
P15473	84741	84882.1	156189	161818	95662.2	288997	80796.4	14808.7	93064	53303.6	44368.3	87313.4
P15684	9800.61	9676.85	3286.52	6910.52	10246.6	6551.61	13024	19956.8	6982.59	134390	10535.5	14694.2
P15978	15065.2	13107.1	16560.7	10668.2	14147.1	23836.5	33569.1	51563.4	62995.1	301876	34019.3	19879.1
P16290	29178	31322.2	30020.2	27858.6	89297.1	17729	11630.6	38653.4	52087	322277	27855	35724.1
P16296	86334.4	82608.5	118203	115183	74679.3	61811.4	108072	76906.1	105816	433037	80368	116095
P16310	2520.7	11170.2	1626.32	10035.3	14588	3597.75	5867.98	10385.1	2209.57	14089.2	8676.48	3411.71
P16617	48658.6	56764.1	59872.6	56445.5	100073	34879.2	20821.1	15992.2	22285.3	226744	30609.2	55115.4
P16636	26307.9	51903.2	48466.5	33545.6	44544.7	142369	21316.1	17300.5	17619.7	287596	21312.3	31079.9
P16638	12454.4	16752	7539.25	15014.6	19870.2	10814.4	178582	16745.3	2551.26	77051.8	5690.34	19257.1
P16975	1	39985.9	28318.5	10478.8	3938.71	25809.7	14137.8	36532.2	20960.6	669308	28131	3014.21
P17074	25001.1	34638.2	22328	43750.1	86415.4	159424	13629.8	12209.5	13179.5	259812	24526.7	21338.6
P17078	17955.7	54961.9	33431.2	56336.5	86330.2	114637	1485.12	12545.5	2510.88	250752	20336.2	24591.7
P17164	6618.69	9575.5	10254.7	15744.6	12223.7	38393.3	16990.1	23606.4	47344.9	406651	68181.8	19467.8
P17220	13403	17222.4	12658.8	7364.26	26096.5	5107.96	30773.3	31535.3	68574.1	115384	72243.6	33573.8
P17246	16879.6	20564.9	31565.5	18503	25910.7	18541.2	4567.3	14865.6	37553.5	354482	33583	14017.1
P17475	35551396	27214366	55747924	45499892	25179494	71107888	63390592	36538032	49878672	151855456	18471926	39514752
P17559	159011	179216	321570	2.00568e+06	218869	502099	71187.8	46878.7	152588	945744	1.63141e+06	46931.8
P18292	1.25156e+06	1.2804e+06	1684278	1.778e+06	1.80422e+06	2.37262e+06	1.68665e+06	1.1027e+06	2.36667e+06	21002704	1559010	1.49832e+06
P18297	11613.9	9249.58	1941.49	7320.21	20319.4	18532.8	957.349	5157.93	8892.26	64528.2	3665.96	3856.91
P18420	49069.7	61319.3	24866.8	24036.5	48601.8	20854.2	48010.5	24393.5	50519.7	205581	19363.7	62653.2
P18421	55007.7	63016.3	17692.8	27999.5	38686.3	33836.8	34928.2	59111.5	58976.5	371986	52149.2	54123.8
P18422	34343.5	34092.8	16042.7	22570.7	27821.8	11357.8	20981.1	21170.8	35738.8	594730	7681.13	20462.1
P18424	162822	75644.5	163726	91869.4	140780	118907	196161	70392	269016	2.13827e+06	501778	276003
P19132	8519.41	15353.3	24220.6	14215.4	25589.8	10721.4	13142	10008.9	16735.8	153558	18439.7	16226.6
P19356	27888.4	13503	14023.9	16294.7	112282	16077	12052.9	34070.2	30906.2	699636	60807.9	10411.7
P19804	94286	121487	141474	129920	157988	140039	27209.7	17855.3	57558.2	604781	28087.4	71907.1
P19939	555735	421112	689559	605095	477290	1.14705e+06	839285	369663	995747	15085192	97757.2	453103
P19945	15292.7	21557.9	13369.3	13299.1	32244.8	12203	7442.3	11253.3	2863.62	58586	20824.9	15264.9
P19999	51929.7	30494.8	83548.4	44797.3	27338.2	85354.9	50875.3	51921.3	72972.9	679815	27372.2	72639.1
P20059	3.26933e+06	1.91019e+06	575191	398662	1.42557e+06	4217149	5.00716e+06	3.26345e+06	6694563	49263124	5282964	5.78044e+06
P20156	6393.97	13400.1	18284.4	9371.15	7040.9	37131.2	8098.13	8127.82	5133.79	100355	8435.14	3317.77
P20759	588485	463731	815166	645450	1.02324e+06	331198	1.20643e+06	1.66867e+06	1.57903e+06	13629728	3.95636e+06	2.75736e+06
P20760	3632475	3.57588e+06	3.91098e+06	4.13934e+06	1.2801e+06	1.24797e+06	7.41657e+06	3.79088e+06	5.38244e+06	48424792	5.42391e+06	5.51515e+06
P20761	4939929	4.15892e+06	5025716	3.22167e+06	2.03387e+06	1.13403e+06	6208735	6.92623e+06	4.78887e+06	45574540	4.84391e+06	5754780
P20762	277489	333740	274271	510619	314987	381330	211159	104224	385977	2.91763e+06	177832	444947
P20767	977745	958971	883704	554370	920404	634380	1.58408e+06	856550	934692	4.91081e+06	3.05845e+06	4395523
P20909	13213.2	12233.9	34958.1	29070.1	40036.7	6471.81	30979	44053.9	53673.5	270927	78449.4	43330.6
P21533	14854.2	17410.6	20422.3	23078.2	38869.1	36139.4	13042.6	15757.8	16425.5	143328	16358.5	19947
P21670	45131.8	34837	15339	22172.6	32696.8	13993.3	48483.4	61709.6	44331.3	683449	44942.9	61167
P21743	46629.6	80758.3	231601	210768	98577.3	225335	51127.9	6115.71	18071.8	126605	7102.59	21752.3
P21744	406707	280701	471326	469115	336556	1.28023e+06	295846	147517	155330	528477	246161	328261
P22057	600432	1.51358e+06	999389	775867	1.07668e+06	821583	715750	655121	597810	5.20642e+06	1.20758e+06	539383
P22062	6257.2	3474.29	25037.7	14872.2	35539.4	18935.6	12365	8001.41	18972.8	146668	12474.8	12122.9
P22355	30975.4	14579.3	42618.3	36568.7	30365.5	17647.7	8884.03	15825.3	14843.8	217385	57592.7	14123
P22985	10962.3	3364.61	14919	65023.6	4245.66	4225.84	9471.55	3272.38	12177.3	44172.9	7830.12	13485.7
P23358	3980.38	9087.03	27439.8	19856	31258	27400.7	7428.76	10068.5	21670.3	228036	15187.5	4567.07
P23562	17835.4	12450.2	19883.6	4379.7	209147	747847	14390.2	23488	37693.3	241994	41676.5	20454.5
P23593	35064.3	39603.2	17360.8	27447.7	36938.3	6165.82	161039	210543	268206	2.86981e+06	350774	199465
P23680	550646	424869	314294	276311	525209	82605.4	745231	814494	1.28345e+06	1.58659e+06	1.04771e+06	634378
P23764	336563	331217	267328	331060	176379	503171	623003	991887	1.19181e+06	8152719	867465	620291
P23785	134212	156421	193417	179897	123856	323913	67802	53106.2	149916	924423	53924	174569
P23928	43158.2	61442.1	73944.9	29014	71546.2	14928	9787.65	21787.3	49434.6	1.10138e+06	65478.3	68614.6
P24090	43066988	49096428	52900452	60978524	42175080	71231576	109562672	11890854	108509792	447045056	130767400	137028784
P24155	4600.52	8735.95	5708.01	6486.07	15714.1	2490	6887.89	5232.93	6947.6	54083.9	7273.54	2935.31
P24268	16599.6	13776.2	13015.9	13724.2	11990	39323.2	23320.1	5884.34	2695.93	182966	17235.5	43266.6
P24368	6242.03	1954.68	5287.59	6343.88	5000.62	6920.08	6439.23	8591.47	7747.4	102267	11276.7	6006.91
P24594	19285.7	47511.9	22811.9	34317	36938.1	56868.7	10904.7	17634	20824.6	173884	6201.26	9023.41
P25095	286117	173847	230318	278938	224112	212046	226830	54135.2	229212	1.43808e+06	97496.2	282087
P25113	86927.6	129649	101270	114175	189904	104665	31938.3	42253.7	51375.8	228872	79012.6	52513.2
P25236	134242	155140	205797	129385	108523	208026	100884	77250.2	43435	1.3534e+06	65630.2	103287
P25304	16853.2	19377.4	16684.7	29875.6	26180.4	15281.1	25184.2	18441.4	12758.1	116695	26513.3	12062
P26051	22142	44028.9	17738.3	25255.7	23559.1	16104.5	14580.7	8746.41	15368	664561	4990.81	13465.1
P26342	39625.4	28589.4	44984.4	22238	25320.8	4470.12	14996.2	35601.7	39374.8	326702	31317.9	22114.6
P26644	7.073e+06	6576760	8620307	8022836	6554335	12140783	9503684	11486270	7503272	1.94333e+06	12375812	10260805
P27139	177472	139086	155756	143397	399166	145477	69339.2	80929.4	52839.4	261832	117412	183452
P27605	11254.5	21014.3	48525.1	22418.5	13336.6	9843.26	30779.2	59608.3	17410.5	216437	28143.4	2414.46
P27653	12190	16580.5	6404.52	18278.8	28815.7	14701	26495	5093.85	8621.13	74765.9	570.493	5466.06
P27768	6313.74	16434.1	11722.8	13683.5	13008.4	19849	1504.52	8153.45	6081.56	78686.2	4088.9	28203.8
P27952	5446.28	10982.4	9008.63	9677.48	18421.1	33495.5	10635.4	14212.3	48691	1.52587e+06	14584.9	3466.75
P28073	30222.8	35062.4	46385.5	28396.9	29651	151405	37200.7	32584.7	25896.2	390040	19780.7	54208
P28075	19213.6	55718.4	12448.2	17635.2	13037.5	7813.96	22963.6	9286.24	54787.4	167270	14953.9	119741
P28077	10531.2	9354.94	8876.43	3061.96	7482.47	10091	11787.8	6894.86	16567.9	164230	3385.69	13914.1
P28480	83677.4	77176.3	8364.18	17933.7	81464.6	8793.26	420632	1286.87	88057.4	660957	309161	146163
P28576	18682.2	24145.9	25347.2	43307.1	30774.5	20041.6	13026.7	15057.2	12512.9	140802	20305.4	19731.8
P28902	9115.15	18912.6	14713.7	11116.1	14369.5	3193.65	25033.9	23760.9	15918.9	134212	37379.7	17638.5
P29315	28251.9	39062.8	37347.8	38450.4	43379.2	19300.7	22458.6	7032.17	23294.5	233194	27228.9	54009
P29534	69615.1	84500.4	75318.6	77624.5	71336.2	44751.4	92774.9	54934.6	158054	943333	269900	119279
P30121	14529.7	12339.2	9319.11	17403.4	8977.09	4705.84	14999.1	10784.9	27760.8	110242	5379.29	19888.1
P30349	11003.9	9685.79	64168.2	6023.45	11144.2	2996.97	41063.4	60794.5	1171.44	232995	13558.3	15016.1
P30835	26673.4	34813.3	27685.8	28929.2	58761.3	33607.4	11872.6	12262.5	16858.9	115537	18469.6	33184.9
P30904	754170	694364	942396	821602	1.31951e+06	1957949	214072	71283	296435	2.74186e+06	79016.3	358688
P31000	4076.9	2751.5	7585.12	3476.51	13611.1	21713.5	4126.1	6656.25	4785.86	86853.9	7532.87	18726
P31044	98228.7	199133	103168	159052	290755	282259	42634.5	40504.8	37800.5	410010	37539.5	109393
P31211	172540	119748	401369	261340	551481	194180	30650.4	17846.2	12010.9	73596.5	16155.3	23482.9
P31394	77579.9	47355.9	81895.6	89377.9	94410.5	89794.3	102751	43016.2	109681	230564	68096.8	119053
P31720	452133	486148	193267	304866	218001	105734	386794	604292	234311	401399	457518	269536
P31721	130155	110636	264836	100236	168446	184116	255894	140639	290803	3.83325e+06	41880.9	43604.5
P31722	332770	306116	189497	212393	212065	236055	224123	289223	116623	928595	74733.1	172200
P32038	252731	208753	238794	139796	154744	214811	326564	320395	320771	741930	394454	308555
P32362	4158.31	1420.22	5460.62	3286.46	21170.1	8686.62	7227.68	4328.84	6210.53	59288.3	945.322	947.173
P33436	37442.4	27988.4	27139.8	31717.1	43023.3	37941.4	30267.4	40909.8	47305.9	671535	43759.1	36680.3
P34058	16446.9	25903.8	45449.4	40445.4	40482.9	33559.2	9872.29	11635.9	10932.1	120918	21394.5	26481
P34064	7127.51	10553.6	31144.8	2370.03	27655.2	19082	21054.5	15751.6	91732.8	329059	10957.1	14091.6
P34067	20184.9	26492.8	6388.63	19850.1	15515.9	16423.3	22157.4	48110.2	39759.4	257006	5683.08	43790.9
P35213	7260.97	10951.2	10595	4860.85	24628.5	6230.75	31714.5	7450.45	9543.06	82707.6	3961.05	10661.6
P35248	28284.6	21257.6	9790.89	73117.4	15975.3	31125.5	7994.39	17625.9	18909	184329	51247.4	7146.94
P35444	35446.9	36945.2	95955.4	108221	36258.7	89781	46928.6	32669.9	85500.4	582422	64790.4	83092.3
P35446	2257.02	2480.7	5708.36	4641.72	10398.8	3390.34	5825.15	7716.42	8838.86	68754.4	7773.38	1071.24
P35572	173496	134177	181290	198680	192298	493483	157967	53376.2	49155.8	314990	88009.5	134129
P35577	40313.7	18332.6	9718.56	16053.5	31291.3	17192.2	160929	110092	202828	2.78979e+06	107492	120833
P35704	720531	513013	832071	510808	1.90196e+06	1850340	212927	85642.8	121014	862363	122818	588038
P35859	7046.33	3580.93	24949.4	5365.05	6621.61	29849.1	23059.2	24517.4	31554.4	925455	27869.2	15498.6
P36201	13888.3	16964.1	25276.1	21467	10962.7	45785	18050.1	20065.7	34704.3	1.1434e+06	18591.5	18947.7
P36953	146686	135766	259829	139277	121669	226236	442422	391294	923873	5158565	1089023	765634
P37996	5510.78	10228.5	9105.43	7170.69	11146.1	4433.19	6259.18	14735.1	3297.06	22270	11109.8	10275.9
P38650	10296.4	16936	38792.8	18867.6	13436.7	106485	64657.9	1061.25	39395.1	518177	3253.73	162958
P38652	11688.4	11401.4	23776.3	20438.3	14247.5	13912.3	5497.18	10045.1	10313.7	120793	4151.25	25145.6
P38983	33671.4	56257.5	30104	43691.6	152399	59030.8	14804.7	7365.91	19951.2	204675	10244.8	39043.2
P39069	87613.4	129281	140837	154167	118437	261774	56375.3	45788.4	110096	203134	70736.6	227183
P40112	9771.26	8284.65	3295.4	12530.5	8857.55	3445.28	8125.81	35757.4	16761.7	18838.6	13443.7	11642.2
P40307	60402.3	101693	81536.6	114376	59233.4	98998.8	188746	48064.4	83163.9	373449	83120.5	105583
P41123	11648.8	32352.5	40738.2	41710.7	66216.6	228469	464719	276260	194855	2.57117e+06	334610	215498
P41498	77650.1	76986.9	88430.2	90221.5	141812	163926	21166	23443.3	46006.6	328676	35894.1	52210
P42123	2867.11	5626.84	7492.17	7951.08	3215.87	7565.4	7409.85	6292.69	4875.46	84496.1	1702.76	6408.54
P42930	80206.1	93976.8	152025	48302.4	101834	234117	8883.23	65754.6	78617.1	849516	68726	107917
P45592	37086	18500	62310.1	64552.6	65720.8	71088.4	13644	4285.4	16328.4	200389	7495.39	41257.8
P46462	33018.8	41293.7	29509.7	48034.5	83561	31914.6	18516.6	12189.3	14004	105160	3521.39	22414.5
P47727	11700.9	12992.5	11749.2	13146.1	22241.5	9777.65	23939.3	8169.55	8797.12	144634	5775.68	22917.1
P47820	7824.7	3875.39	6913.01	2227.76	4058.59	5057.72	7194.23	28967.4	18015.3	94945.7	14449.2	3643.26
P47853	7645.94	18867.8	12058.9	5412.94	6691.67	5546.39	11724.7	13577.2	8247.24	107190	16678.9	8737.69
P47858	10031.3	18351	172.681	9721.8	562.925	13648.8	7804.87	6804.09	5551.63	92963.7	157.052	7194.58
P47942	9273.68	11042.8	13272.1	15962.3	12472.5	6362.84	4818.06	5061.38	7167.5	45783.1	3081.4	14359.9
P48004	19026.1	29145.1	10663.5	14515.3	14047.4	9649.54	19735.2	17766.8	44394.4	257971	20267.4	38938.6
P48032	40363.7	14048.6	17961.3	53648.2	38167.8	23235.2	17745.7	27698	90206.1	631249	23891.8	10977.4
P48037	9145.38	14993.5	12796.8	11616.4	11110.1	11219.8	29196.2	9072.39	3802.37	81660.9	2584.14	20329.6
P48199	995469	1.45468e+06	1.4067e+06	505697	351265	3.73802e+06	552293	245806	1.62259e+06	2.97496e+06	1.86602e+06	629442
P48500	106198	180086	219066	190319	210083	109552	52251.5	83736.7	106262	637338	148131	222633
P48508	15017.3	12251.7	17026.4	8295.31	52060.1	7479.81	11901.9	23585.1	12804	92496.1	26722.3	11622.7
P48679	4256.45	6814.82	6204.39	4780.86	795.96	11575.2	5236.61	10112.5	8418.36	85443.4	8901.6	1516.33
P49134	10277.2	6241.86	2333.5	2138.07	2469.92	3383.43	17578.7	14962.1	9262.79	136822	23788	17687.7
P49242	5950.02	27033	25936.3	20204	37088	103017	15042.1	12427.8	18524.1	286484	17552.2	2584.07
P49744	92082	82723.7	66255.6	133887	103216	60732.8	94574.9	155034	91975.6	702002	98036.5	103574
P49911	11275.9	6870.32	4729.26	6020.17	5424.88	19488.2	2146.55	35735.5	33176.2	269307	81204.3	10849.1
P50115	18520.5	27561.1	33198.6	18105.1	23342.2	24195.1	226638	489560	7308.95	894565	4638.4	14263.6
P50137	55194.3	51076	61813.8	36696.8	75782.8	29018.3	24625.4	37330.8	6624.24	291358	65311.6	27232
P50398	18823.6	27623.1	21421.8	22109.2	21718	12118.2	21042.5	33657.1	10428.1	160777	33221	16234.7
P50399	11899	8375.16	15279.9	18944.5	24101	7284.47	17261.1	5075.49	3969.88	154067	6606.23	24615.5
P50463	2726.7	6702.62	4548.39	7061.56	17259.5	5146.9	6446.48	4916.11	6685.17	52169	7017.38	2325.81
P50503	36336.3	43149.9	83385.5	39650.8	74888.6	62008.7	17742.7	3502.79	14421.9	106216	19794.6	34593.4
P50878	2077.26	8108.2	8815.02	15068.4	25442.1	68981.8	2813.26	12851.8	21650.4	387325	14374.7	16077.4
P51886	235728	253511	368863	239020	228115	77098.4	158590	287951	273996	6622383	457834	248787
P52296	11112.2	9040.59	9322.68	15147.4	11973.8	22072.1	5086.23	3774.42	10149.1	75096.5	8817.19	9534
P53534	6822.45	12464.6	10512.8	14862.1	9190.78	5739.18	9617.16	9729.83	6596.9	80366.8	9030.54	4839.45
P53813	131122	118652	120555	74892.8	99201	62174.3	125645	54805.1	178493	796345	43990	149494
P55053	250893	337629	277422	358922	555941	832501	45852.3	60319	41663.8	791477	16413.1	67566.1
P55159	79910.6	33005.3	32938.6	18587.3	16816.5	247138	195605	123442	224729	1.8003e+06	214020	190250
P55314	160357	163693	104302	148996	131423	88853.9	129236	365466	355742	8.05252e+06	390498	202467
P55797	124855	69336.4	274788	171590	139722	199117	341975	514208	328985	10608347	426375	261770
P58751	22285.1	15654.8	19118.4	24304.2	15356.4	8164.89	31943	16707.5	38433.4	267056	42498.6	32448
P58775	28909.4	19120.2	195762	22610.3	37855.3	53293.9	31090	421080	100360	478751	43772.3	46314.5
P59996	56582.9	51320	188862	310576	77671.4	51479.7	92234.1	97773.6	130359	551687	64195	108240
P60711	217641	348599	388746	340421	203436	151562	113327	240626	235603	1.9489e+06	273679	314381
P60901	14704.7	12213.4	22412.7	6829.46	20101.4	14727.9	20582.4	8698.09	21156	436203	9158.55	26189.1
P61354	2577.51	4883.09	5512.47	8020.2	10342.4	29784.4	8641.76	27875	40083.2	997145	26862.8	12739.8
P61589	7981.1	19886.5	11280.7	8016.98	23159.2	12322.7	3539.74	8620.42	10401.4	48731.3	13588.7	9620.59
P61959	5074.14	13799.7	21016	20543.5	14168.1	64257.7	45460.6	46564.2	2969.76	1.2805e+06	43915.4	14736.4
P61980	5325.08	10579.8	1316.93	15803	10492.8	27655.5	4079.74	116754	41942.9	207120	52271.3	18363.4
P61983	23365.3	31450.7	69507.5	52715.3	28534.2	39925.1	18309.6	3107.48	26821.4	183212	17996.2	34130.8
P62083	130181	176460	284550	172151	127969	140820	230400	76762.2	230141	2.92558e+06	147004	253321
P62198	4553.06	8703.82	3764.26	7645.05	11212.4	2937.29	6329.86	2555.17	7433.99	26431.8	4716.03	4348.67
P62243	11476	33410.5	26782.8	24259.8	56694.8	99773.8	14136.7	10989.5	5409.57	208640	17630.3	8398.8
P62250	37022.5	48822.1	55998.4	72005.5	96413.3	291248	12115.3	14804.5	13821	284540	19338.3	39057.8
P62260	15585.8	18110	19743.7	20702	33945.8	21370.9	7196.74	18354.5	7393.75	93711.4	11492.2	19502
P62271	17882.3	26181.6	24785.7	28734	32088.7	78565.5	13156.9	11485.8	22005.9	315577	5595.82	19372.8
P62278	2333.95	6008.33	8541.81	4024.29	27528.8	9348.46	6325.98	5849.07	7826.39	39967.3	9667.14	7542.81
P62282	12688.4	25802.9	15332.4	14516.4	66090.8	26489.4	5433.81	11916.5	6237.57	113973	22254.2	19077.1
P62628	9601.49	23609.5	24174.5	21343.3	18425.3	53020.7	26593.6	40760	34360.5	1.1445e+06	12314.6	16033.8
P62630	253807	338611	418647	312151	530498	745601	92013.2	61100.2	108178	1.45458e+06	68722.4	278330
P62632	75571.6	18066.2	126179	96864.2	23488.1	77374.9	48089.2	65897	67828	568077	50137.6	21024.7
P62634	9615.6	24488.2	15086.7	32020.1	48486.3	88162.3	12135.8	11932.2	16792.8	210353	12606.4	3146.63
P62703	15316.2	26811.8	9677.58	16110.3	60371.1	28729.3	3604.1	10168.4	4405.51	105123	9628.41	10645.6
P62738	574117	750294	801353	855796	427399	665976	306653	511747	506543	6.63498e+06	896452	844128
P62752	36617.4	70459.1	43681.6	43893.1	40038.1	192222	20757.7	16983.3	22711.8	291742	4888.59	27547.3
P62755	20948.9	26619.1	16187.3	30998.2	71580.9	132590	13204.3	8450.15	7112.72	225887	15368.6	10117.2
P62775	35153.2	81445.2	59831.4	23547	23027.1	100998	22519.4	20355.6	57198.4	279484	23455	17911.6
P62804	6171.85	4557.49	89584.4	3333.27	36159.8	45493.1	2071.71	1551.75	26131.1	561559	9738.71	2828
P62828	64010.6	80605.6	26442.9	83596.4	148482	96250.6	25578.1	11346	6056.01	256016	6464.3	46310.7
P62832	13083.6	44028.4	22489.2	34682.5	103063	174456	9951.87	10367.4	13408.3	255753	40375	18719.1
P62853	16600.9	38916.6	7583.9	45855.5	73229.5	342172	187067	28090.5	49497.9	354386	38465.6	5310.32
P62859	94171.7	185606	104021	119500	314738	530707	49378.8	28602.2	50360.7	293626	143877	122534
P62870	37393.9	10531.7	5378.25	10758.7	16145.5	29930.9	9752.71	4381.62	31099.6	804666	7711.36	5689.76
P62890	22876.5	93265.1	68115	60107.6	208563	203155	24122.3	25650.6	22808.2	315830	62943.8	78306
P62909	27044.7	26023.4	29236.9	24459.9	71378.3	55749	39256.7	10703.2	13879	64072.7	35312.3	25891.2
P62914	22820.7	60734.8	24589.1	42955.6	46555.5	266392	5554.91	12349.4	24167	277492	14832.4	41171.1
P62959	62567.8	65915.1	87790.1	73716.8	96112	390957	37001.8	8677.17	30787.2	255312	21070.6	72576.2
P62961	19899.3	28522.2	50022.4	26863.6	47007.5	129663	18039.8	13785.9	17266	241298	45917.4	9675.44
P62963	117222	121281	142896	144134	140347	99897.9	52964.5	74105.4	68256.5	702143	107662	132812
P62966	2456.94	5275.77	3028.95	3893.76	3742.18	1822.3	5818.71	9032.94	9641.25	75295.4	9038.55	2370.39
P62982	341202	431062	247403	332214	442999	1.64318e+06	71946.7	17943.7	50911.3	709484	52627.2	115037
P63018	174394	261240	314173	257369	431946	164831	85838.5	52700.3	123630	1.46786e+06	87166.6	203587
P63029	38308.8	30505.7	52228.4	51205.5	55720.5	9722.53	16030	20758.9	15637.6	30400.4	36502.8	35950.8
P63102	22984.6	30087.9	53124.3	32239.1	40270.6	32155.2	10334.9	36574.8	94015.9	76058	23103.1	36344.4
P63159	6336.57	15160.3	15917	12345	12833.1	29484.4	29207.9	2106.22	204832	8.221e+06	1086.09	10286.1
P63174	5439.2	14327.9	9082.85	11492.3	14667.1	32614.1	12276.1	19981.3	61177.4	1.92125e+06	20862.7	11079
P63245	8518.74	61449.4	19475.8	15024.8	49493.9	74525.4	78241.9	21190.9	32212.2	314835	45270.5	14943.5
P63255	17717.2	18957	64996.5	42388.9	6822.1	43239.7	33950.5	56879.4	21722.8	554359	8019.91	10177.8
P63312	4331.99	11325.7	17545.8	7232.93	13627.4	103788	21968.2	18804.5	21717.5	511934	26527.8	18268.6
P63324	30085	43462.2	47762.3	32364.9	102217	215764	9044.7	13681.3	25396.8	284136	728.25	28370
P63326	3476.8	7816.26	3223.34	15892.2	10643.6	93523.5	47427.3	33482.4	40920	679744	25164.7	47266.6
P68255	29869.3	73752.8	112875	42453.1	22999.8	46498.4	26490.4	25569.4	38412.6	447313	23578.2	55203.8
P68370	179076	468242	248733	184172	290626	132242	103719	200083	136892	1.74073e+06	309950	273605
P68511	9568.94	7341.69	15338.7	15655.6	21646.9	7569.58	11541.7	9228.8	8575.37	53864.2	11523.1	5219.43
P69897	45137.5	108239	94601	76721.9	68222.4	22454.2	47446.4	57776.9	30128.2	257837	72423.6	83035.1
P70623	111355	58343.2	103004	22305.6	52712.9	51423	30406.2	40542.5	56333	145709	17230.3	75993.5
P70645	18896.8	26005.7	25199.4	15062.2	29484.1	4829.5	9115.02	21317	33951.4	374664	34617.5	20408.7
P70668	4988.43	5811.58	29152.1	6695.11	3195.67	23684.3	5041.17	5623.92	8565.5	119392	8373.95	12538.9
P80254	48227.2	73518.4	103442	62803.7	74192.8	141964	23028.3	17416.8	22007.2	271405	39532.2	50145
P81795	10910.1	12269.7	3760.25	9118.28	22827.5	50599.5	91309.8	15532.8	3324.33	213200	4175.67	38789.7
P82995	25562.3	53996.9	29757.6	35843.7	38901.1	23453.6	15955.9	11440.8	10279	50315.2	15704.5	21853
P83868	43454.3	35045.7	32040.6	40985.3	48914.7	14982.2	15393.5	11963.6	6912.12	84682.7	18331.5	26540.1
P85108	53189.3	113602	59984.9	45229.4	75613.4	24771.8	19245.8	20151.6	18612.8	623026	43114.5	37459.1
P85845	21591.4	4706.38	31023.8	17063.2	8448.18	6436.76	10446	23315.4	116728	321969	3108.73	23641.8
P85972	26539.6	30290.8	19323	17329.1	20929.9	18386	13006.1	16108	31862.2	492410	27960.8	19902
P85973	41563.1	39671.5	24462.2	36918.8	85079.9	26651.6	5995.89	15418.4	24151.5	253760	37355.2	26823.7
P97536	18727.7	45937.6	16991.7	17443.9	37465.9	31564.3	8089.02	18867.2	22557.1	72328.3	16139.1	31977.2
P97571	55234.5	39248.2	49356.9	34755.2	61018	6605.94	38987.4	60159.6	163478	1.44178e+06	243009	92427.5
P97586	10165.8	9304.27	9768.54	14936.2	6230.83	19877.4	11833.1	37363.7	16480.6	182438	17251	18267.1
P97603	34163.4	19043.3	11068.9	76496.6	20145.2	42054.1	21913.4	25277.5	18146.6	725970	36124.9	102752
P97710	9174.84	13307.5	11032.6	12558.5	7691.16	11159.4	11405.7	4239.34	10613.2	84358	9964.43	15425.9
P98087	45690.5	27511.8	35739.5	30540.3	46320.2	15227.2	16719.4	3435.98	29826.9	189875	22719.9	33836.6
Q00495	125560	123254	57581.1	72639.9	78824.7	29404.5	146214	150655	91413.3	1.31798e+06	216068	180000
Q00657	20755.1	22891.8	13151.7	17992.3	28332.5	6861.24	24460.3	20360.3	14116.1	107144	22278.9	17091.3
Q00918	4812.34	18694.7	14405	21415.4	24726.1	78813.5	14685.8	8787.88	4533.3	59544.5	13814.2	1731.31
Q00981	9125.25	24862.1	16457.9	5545.76	18518.1	14352.2	10540.3	10683.5	8436.73	60630.8	13506.8	5611.92
Q01177	1.09796e+06	1.25436e+06	1.47188e+06	2.23934e+06	970000	1.68318e+06	1.17451e+06	405928	1.49943e+06	12506150	682940	1.39261e+06
Q01460	10195.9	6866.45	6668.26	9324.44	10934.7	6061.49	8851.56	8322.73	21572.8	80988.3	9433.95	12601.8
Q02445	14335.5	27288	61599.5	33726.7	34427.5	17839.9	43240.8	13369.1	47871.2	1.06088e+06	16385.9	82496.2
Q02759	21945.3	11703.4	3387.05	11351.3	21998.8	22987	41614.5	10237	36965.8	161275	39102.2	98834.6
Q02765	8533.13	9482.8	12053.9	5350.42	5189.68	8209.23	9154.07	4514.07	10610.9	124853	11260.3	10317.2
Q03626	815752	1.07493e+06	1.64457e+06	630041	715222	1.19152e+06	1.74698e+06	792543	1.42136e+06	8182821	684355	1.53056e+06
Q06000	75371.7	5913.64	5037.46	8259.31	3884.99	3978.08	16485.7	17131.1	21958.1	110779	22306.9	30710.2
Q07009	23229.9	18948.8	18312.2	13445	14456.5	17072.3	7538.82	10171.9	21960.7	313972	9273.51	48737
Q07936	1837.33	3653.1	619.136	4363.07	20873.5	3955.13	11160.1	8524.63	6948.79	134551	30616	23779.2
Q08163	9526.84	21797.2	13079.3	32230.7	20363.7	10553	33282.1	12084.9	11196.4	89072.3	5866.87	15029.2
Q08420	258014	236565	330623	242386	188916	669882	261504	348654	364735	1.30151e+06	268525	322732
Q0PMD2	5640.2	4041.59	7405.68	6937.76	3565.96	6493.76	18858.9	8974.53	12481.8	112478	11398.4	16836.5
Q10739	33436.2	15999.8	23520.3	23611.5	25635.9	83716.4	6357.85	10288.6	18074	213361	5400.71	7748.35
Q10743	3389	8833.72	3404.58	6818.33	15369.9	15292.5	4851.76	2816.84	9875.7	73818.6	5812.29	11360.2
Q32PX7	6348.23	9400.56	4876.39	7829.15	16426.9	12430.9	5902.68	3558.45	7386.37	67920	4166.1	7488.6
Q3MIE4	23483.6	29564.2	9226.92	16936.5	13805.5	25303.1	21608.3	21864.7	23838	212665	32503.1	41913.7
Q3SWT0	6877.66	18765.2	7887.44	4165.08	5749.81	3882.47	6600.45	6864.2	3727.22	84327	4433.02	5390.81
Q3SWU3	18522.3	26050.3	29023.5	15710.7	18765.8	60667.5	9963.15	12420.7	9707.62	494509	12136.3	30976.4
Q3T1J1	12121.3	25621.9	19925.5	22869.7	42746.9	27384.4	8143.23	27639.1	21479.1	233807	44009.6	29939.5
Q4FZU2	48929.2	65001.4	43319.9	24828.1	32729.5	46416.5	102730	13110.7	48183.5	624385	81032.6	53110
Q4FZU4	14494.5	30375.9	12789	24482.6	16096.6	27347.7	25025.1	9824.71	27707.4	74647.6	11243.1	24431.7
Q4KM35	7436.97	9933.35	34838.9	2961.07	19151.6	41576.7	9325.67	2152.64	14382.7	880655	7046.23	12436
Q4KM73	22208.1	18462.4	21350.1	14931.4	55598.7	50867.2	873.816	2341.4	11693.9	113183	4963.67	14789.9
Q4KMA2	22237.2	21445.3	10148.5	16998.3	38016	26527.5	8186.29	16087	15815.9	115615	11111.1	21921.2
Q4TU93	11917.9	8864.44	9781.23	12791.7	12355.3	1808.97	21112.7	21956.8	18223.1	153293	40149.3	27078.3
Q4V7C7	11745.9	6617.63	5952.24	4983.97	11930.9	5003.97	8098.91	5658.84	10298	91743.3	14709.6	7202.83
Q4V885	24436.4	53112.2	106425	50914.7	21161	119580	389021	93911.8	18056.4	1214819	411050	300154
Q5BK06	268224	211496	170329	139278	223421	236266	551163	290100	586269	2.92643e+06	183894	573141
Q5FVF9	316768	298414	352433	268679	335636	197237	394941	189721	786251	3.08615e+06	744671	546540
Q5HZY2	3736.17	7188.08	8348.38	3290	10971.7	13704.2	2683.89	4284.28	6307.92	79117	2071.36	15435.4
Q5I0D1	5094.63	4740.91	3761.53	8805.34	16464.4	10436.5	5693.08	515.452	1020.94	66848.6	2559.8	7882.9
Q5I0D7	23342.3	40685.2	16227.6	15241.8	18085.2	8874.82	31269.2	35501.1	72825.1	111115	26754.8	40252.8
Q5M7U6	32356.9	24119.9	11488.6	22864.4	35490.6	18404.6	25234.5	25291.8	31666.2	334899	58426.1	41799.1
Q5M872	9156.44	6494.46	9976.54	5141.78	7079.92	2815.69	3728.14	10939.1	8063.84	318381	35817.9	8050.63
Q5M8C6	146148	90899.9	48278.8	50589	65625.4	34308.5	35310.8	36238.5	40474.4	521131	60409	36054.1
Q5PPN5	30698	36261.9	47789	41732.6	30376.2	112789	14129.1	9109.79	7670.15	266083	13293.8	37048.7
Q5RKI0	12635.9	7685.36	44032.6	32619	25916.9	5856.65	10297.6	8929.13	24557.2	246611	73764.2	11640.5
Q5RKI1	32860.7	58895.1	39040	39997.1	121349	36344.4	11226.8	16742.9	15803.4	201156	29956.6	16965.9
Q5U300	38934.6	39900.4	31091.1	46780.5	74156.8	37336.9	14343	15126.3	12160.1	28679.1	23646.5	37090.2
Q5U349	1.14178e+06	173084	2.4817e+06	2047572	1.8581e+06	17820.9	494713	2.43208e+06	2296163	34178132	3.00179e+06	1.02107e+06
Q5U367	5083.8	4970.98	5064.33	4234.42	10078.7	6285.15	3447.87	4775.07	1082.36	67697.5	5834.25	4925.01
Q5XFX0	84716.1	144137	89531.8	95539.2	107773	131730	11967.5	12445.2	92376.1	193179	28768	83355.1
Q5XI73	114864	196683	150386	104170	230610	78864.2	148413	22740.8	79581.6	347262	41758.6	181875
Q5XIF6	37904.1	71535	25519.5	26894.6	54728.9	8180.04	11462.5	15716.8	44577.1	181103	86161.4	78951
Q5ZQU0	4372.15	4070.77	2528.19	3449.15	7250.28	6867.83	4293.81	5323.12	16741.3	81101.6	11717.5	5425.48
Q62632	94848.7	101628	71647.1	112643	43405.4	278854	41963.2	7412.99	36963.1	197884	26711	52932.9
Q62658	56049.3	94171.7	28152.9	76854.8	112148	188236	8577.61	8350.43	69087.9	281207	12671.2	40080.8
Q62740	59650.1	41600	59227.9	69015.1	54015.1	35839.4	63755.6	66905.6	84662.2	957604	29072.4	99850.9
Q62764	18573.1	25443.9	99185.1	34146.2	66578.9	255923	33970.2	14584.2	23718.2	282136	2800.69	8193.01
Q62785	20938.5	37049.3	24393.6	30445.2	61661.8	128590	13823.9	11369.2	12857.3	238790	21169.3	17475.4
Q62812	9355.69	17588.8	11429.5	10676.3	11826.7	7654.46	5410.7	3507.83	18064.5	74846.1	19228	17622.8
Q62840	24385	19774.2	5770.74	10974.5	8054.16	27858.1	143326	159073	118013	1.01973e+06	225700	126190
Q62894	165142	109391	154734	102564	87294.5	167538	297192	248953	210389	2.15979e+06	334469	307343
Q62902	16801.1	10120.1	21502.3	7797.75	13511.3	23364	22234.7	13292.3	12652.1	229586	12189.2	22520.4
Q62918	9307.95	17394.6	24629.8	12743.9	17932.9	7430.44	2746.25	7843.36	11733.8	65729.4	23094.1	3539.54
Q62930	142786	109883	57101.5	42142.9	49494.6	121642	197992	153219	209414	3.16833e+06	158636	230800
Q62935	36537.9	41307.9	49483.8	18282.5	32221.5	15905.5	175509	80540.8	52307.5	268853	144100	52400
Q62975	246795	156097	354940	319788	295962	176542	303178	296385	388851	3.7191e+06	474314	318046
Q63041	9078550	5051405	9698740	4.79775e+06	6038441	6.45324e+06	11553510	8.16142e+06	11320393	156371904	9931630	9631007
Q63083	4765.45	6272.83	13762.3	5804.48	5823.24	6252.66	18321.6	6440.31	8889.57	103036	6842.04	12490.3
Q63088	253128	179329	286388	297121	17328	105397	274277	771476	188636	977748	162170	172745
Q63108	8298.88	32703.6	20065.9	25422.4	36059.5	66507.2	64251.3	20497.6	38850.9	433398	43922.1	24159.7
Q63198	28738.3	15795.3	23607.2	25912.9	25847.2	17881.6	60390.4	67710.1	35460.9	150311	106524	39336.1
Q63207	111485	131915	135640	185950	87511.7	181369	114872	89961.1	105099	2.46651e+06	57683.6	134470
Q63228	31754.3	29533.4	34957.7	35640.1	36744	62054.8	9469.11	24487.1	34555.7	239726	45055.1	30610.7
Q63313	43001	91791.2	36301.9	42694.6	55945.6	38615.6	50370	42483.5	66347.9	1138085	52807.2	71499.6
Q63416	1.37644e+06	1.46849e+06	1.63946e+06	1.5698e+06	1952196	720084	1.72986e+06	2233201	2673113	27679566	3.10914e+06	2.02803e+06
Q63507	16762.5	27369.6	17147.1	7841.34	46503.8	57119	10860.9	21730.7	15549.2	185351	20759.3	16083.7
Q63514	536798	395749	180270	203325	229602	292822	740793	221714	554514	1.89802e+06	726852	617123
Q63515	16602.3	23464.4	21181.2	27872.6	29687	55192.1	4226.39	1279.78	30431.7	226925	2505.38	60350.4
Q63556	919725	552017	1.2189e+06	713429	458891	1.01902e+06	166055	412393	485531	1.3197e+06	147159	245728
Q63621	150247	128246	214603	189872	142544	200217	228104	111442	272368	1068965	109025	264569
Q63678	241373	192033	210856	198549	141378	102290	294898	347106	269208	3.27151e+06	426538	317532
Q63716	39923.2	47343.9	39934.3	47808.2	108221	69405.9	4562.29	6087.09	13890.5	95719.8	13483.4	13014.2
Q63751	4362.92	7128.82	9752.74	7668.38	11278.5	13614.3	2094.76	3213.61	7383.75	90638.6	8492.09	17433.1
Q63797	19075.8	8672.13	8486.58	3417.99	22911	12350.7	2753.69	4852.72	7781.31	54098.7	2235.5	8930.27
Q64057	5707.68	4418.01	4397.49	13187.1	3926.09	5974.1	8098.63	2074.88	943.601	104439	6976.95	8785.95
Q64119	11374.5	48198.8	33310.8	32138.9	11077	14521	32596.4	57546.9	21535.8	295800	20938.1	25982.3
Q64240	3470975	2.69526e+06	4272130	5.25545e+06	2.7492e+06	3.16151e+06	6.90383e+06	2.21185e+06	5.61755e+06	18662724	2.5311e+06	6.45749e+06
Q64268	152692	104118	127860	103793	163267	77690.4	230692	200571	326113	5850397	176288	267626
Q64537	5106.29	5866.94	6170.24	2405.53	9043.22	864.781	3554.71	3005.06	11749.4	72403.1	6902.84	7079.37
Q64604	10881.2	7223.24	9350.83	7845.37	75178.9	2023.84	19879.6	119921	83055.1	51540	132418	13222
Q64605	4771.46	6090.85	7777.06	7048.83	8956.84	8797.04	8678.7	7347.71	8757.1	95985.3	11744	11684.1
Q64610	7422.62	6657.09	10509	12710.5	8269.52	247228	10337	7505.3	16282.5	284150	4761.28	59848.8
Q66H59	9150.08	4730.89	2297.21	3144.9	6456.09	4441.06	12606.3	13232.5	11758.1	108924	15223.1	10237.5
Q68FP1	334911	492036	958218	1.13877e+06	804939	429095	329402	309177	439371	2.15978e+06	578323	457373
Q68FP2	21450.1	34612.5	24223.8	708.022	8913.06	17892.5	143667	28985.6	7090.27	425960	51223.4	91928.8
Q68FR6	22195.1	32648.9	24793.2	39107.8	63171.5	29997.6	18003.4	3600.19	11764	99440.7	4064.96	25142.9
Q68FR9	11410.9	19046.6	13287.2	13629.4	39005.7	10137.2	3860.67	11770.1	6143.6	69954.3	16770.1	17171.7
Q68FS4	17057.2	17039.2	5851.59	18335.1	20713.2	7131.54	28682.6	19193.8	22501.5	160519	17529.4	9854.59
Q6AXN6	94405.6	132892	77543.4	65463.2	204020	517658	55983.2	19677.2	50361.3	272395	141304	101536
Q6AXS5	12551.9	27620.6	38813.2	17268.4	42603.9	68934.2	11917.1	14186.7	18352.8	264421	8946.13	3875.86
Q6AXU6	6525.67	19583.5	42479.2	12927.1	21699.6	36728.7	44872.6	86134.7	2986.01	460876	9640.13	8583.61
Q6AY63	12068.3	32544.9	11183.7	19859.9	39900.2	49521.4	317796	457562	9477.39	10470802	423346	29372.8
Q6AYE5	14874.7	13418.6	18240.7	30593.1	23039	21086.7	15908.6	20172.2	12345.8	124878	38357.4	23543.2
Q6AYH9	19008.7	27063.2	84783.2	74871.3	54628.4	10766.6	62482.2	20334.2	20225.9	563405	22268.4	125475
Q6B345	16198.4	3840.08	17607.9	5300.65	15702.2	28715	26674.4	35969.7	35186.6	388026	30853.9	23093.9
Q6IE51	9028.13	9976.89	18909.7	13874	7129.65	57869.4	12248	26892	47664.7	811256	26121.1	13044.4
Q6IE52	3317794	1.77106e+06	4.02342e+06	1.6872e+06	1.94854e+06	3.33939e+06	5.06018e+06	1.80941e+06	3.5623e+06	21642484	1.8988e+06	4.16234e+06
Q6IE64	6142.87	2821.73	7872.06	5873.3	18149.5	7026.83	5333.07	5544.26	3722.89	39990	9808.62	7151.66
Q6IFW6	20707.2	12213.4	316541	13096.7	88955.1	27071.9	66841.8	42540.5	12748.7	524859	25512.5	40636.6
Q6IG02	5927.93	31870.4	6427.07	28368.3	9906.8	1344.55	55849.6	10417	16752.4	126413	8980.25	23821.3
Q6IMF3	41063	20218.9	42172.8	12895.4	61654.5	53395.1	80534.9	8478.48	21779	229778	34503.6	51862.9
Q6IRK9	58740.6	38940.2	95982.3	56239.1	41804.9	41038.7	118099	43803.3	171387	1.01871e+06	137143	168403
Q6IUU3	347054	345693	309097	276891	371592	172487	461600	431691	410645	4.25568e+06	637390	506013
Q6L711	9640.1	4153.85	12348.9	38944.4	22382.7	22987.2	19059.7	12751.9	44253.7	99569.4	14626.6	33488.6
Q6MG61	17610.6	36377.4	13958.5	18172.6	38294.7	17178.1	14115.4	19717	9022.97	127539	17058.2	7639.69
Q6P502	19547.9	39852.2	10530.6	25881.7	44856.5	22620.3	29506.9	10586.4	12047.9	24091	15803.6	17265.5
Q6P6Q2	728352	32489.7	1590808	111563	93989.7	85809	1.63467e+06	373093	96839.4	1.07657e+06	1.15295e+06	1159308
Q6P6T1	250571	173480	227298	199617	135426	140349	264126	215672	286182	1.75042e+06	133855	235393
Q6P6V0	26291.2	12928.5	34538.6	31491.8	39925	5509.36	7435.48	7866.1	7527.35	21712.2	11635.6	14194.7
Q6P734	529121	343352	401181	368315	524117	194691	295476	720194	476322	9210739	863740	421189
Q6P7Q4	10530.1	17721.4	16827.1	12770.6	53705.6	31080.1	11029	13044.7	9971.71	118274	16495.1	14509.4
Q6P9T8	70176.7	137428	84910.1	90927.4	145303	93673.2	15601	82141.7	86393.9	516246	61094.8	63785.6
Q6PEC1	39886.5	55831.9	59972.3	50453.6	102230	301501	74824.7	12899.5	17109.9	259016	21293.1	34071.7
Q6RUV5	24206.7	28809.2	28622.1	37606.5	44461.2	30015.1	12243.5	11697	12595.3	106157	10344.5	32008.4
Q6V0K7	55060.1	85877.8	40166.3	44410.9	226370	27599.9	263554	46376.1	83155.7	367654	156971	44109.4
Q71UE8	26122.5	65435	55833.6	63334.4	42583.6	132352	12468.1	17275.2	21471.9	268417	23752.9	31571.9
Q7M767	9628.59	14788.6	19892	15381	41776.9	20411.1	11812	12477.6	5798.21	102377	17606.9	13608.4
Q7TMA5	818977	507511	721032	541202	588328	438496	1.12036e+06	1336074	1.08991e+06	13368617	2.03353e+06	1.24461e+06
Q7TPA5	10536.8	11215.4	7768.05	8331.52	15443.7	6885.76	19048.4	22258.7	13522.5	138831	24782.5	13208.4
Q80T18	331689	327004	427526	32787.4	1.25709e+06	85743.8	306220	9837.69	140525	1.85294e+06	140832	243509
Q810F4	16127.4	29435.7	49182.7	37971.9	34454.4	67444.8	14137.6	9317.49	11497.4	171418	4245.61	13400.3
Q811M5	98882.1	129546	75098.3	93802.4	44224	167877	163219	97819.2	191537	592733	238694	183075
Q8CHN3	7615.72	1650.08	31589	27650.5	9612.12	140112	29863.4	13869.9	8686.52	386647	8413.2	48631.8
Q8CHN8	76079.4	86097.8	78128	53325.7	115825	20366.6	87440.7	26175.3	106876	609727	86444.4	120554
Q8K3U6	17496.4	8317.43	7989.44	6620.83	9494.93	2541.22	42295.3	29690.6	32858	359712	49579.2	47473.1
Q8R2H5	176885	141668	212269	153863	114939	137829	184542	77433.6	221904	1.5698e+06	108515	171580
Q8VIF7	6634.5	8272.88	9642.48	6118.46	7710.11	2134.05	8248.8	157.898	9671.04	101126	16907.3	15613.2
Q91ZN1	1218.92	9290.04	6777.51	1866.93	6013.05	5974.25	717.67	9180.26	2799.18	29552.5	603.585	5096.53
Q91ZT1	8927	26951.1	13026.8	17712	11918.4	10502.9	19978.3	13604.6	20697.3	145054	27757.5	11608.7
Q920H8	12010.5	6115.52	8153.59	8870.04	9147.95	1400.47	12626.9	13681.8	8997.11	180836	21033.6	11264.2
Q925F0	2640.22	7575.04	6938.08	4047.09	5285.77	16203	5212.31	11438.7	9509.31	97032.6	14420.4	1323.72
Q925G0	11025.9	5356.95	21092.3	16435	17743.8	35073.9	12014.7	11203.1	42170.6	1.29397e+06	16538.7	7220.46
Q925N6	21851.4	19181.5	7259.97	28107.8	22503.2	19918.3	17249.8	18823.8	70173.2	322353	16674.8	20541.9
Q99372	127098	81379.1	170783	133754	151495	479274	340913	291730	237461	462046	561886	314878
Q99376	25736.7	30645.8	21969.2	23150	34921.1	36334.3	28241.2	29381.2	32895	128089	43426.4	40453.2
Q99J86	264877	186946	225627	173790	136934	241334	447604	212086	274868	802029	219848	285474
Q99MH3	157923	326844	162754	127084	22993.8	528150	2075.57	25093.5	59643	268180	8541.4	7330.84
Q99PF5	12044.4	17080.2	36948.1	26672.7	5312.6	72297.3	16636.5	9421.03	30456.8	955721	10402.5	13493.4
Q99PS8	2.19553e+06	1.57653e+06	2.27933e+06	1.47262e+06	1.14642e+06	1.83233e+06	3.84708e+06	1731267	5141133	10728880	1.72647e+06	3.75313e+06
Q9EPC6	7823.77	9798.42	18306.4	17946	12155.8	17024.1	24204	8257.11	3742.56	98596.9	6642.45	18489.6
Q9EPF2	2439.47	20878	16626.7	3912.53	13009.7	2088.73	91065.1	26041.3	8804.23	209064	12121.9	36674.6
Q9EPH1	33269.7	131862	36560.3	28465	183935	2.11199e+06	243602	237749	87752.2	637045	9293.43	11815.4
Q9EPH8	11095.4	25154.8	11885.9	17173.5	36681.1	24371.9	5638.41	13754.3	3770.32	101295	19676.9	17292.3
Q9EQV8	142657	112091	40619.3	93529.2	71869.1	72712.1	304328	172163	288298	2.83289e+06	259141	298657
Q9EQV9	144735	89770.5	121254	138773	175793	67917.3	132016	76294.9	207552	1.11809e+06	59928	155769
Q9EQX9	48372.3	45739.4	18677	38030.7	109664	101231	17675.3	47564.4	52055.6	831260	46321.4	44309.3
Q9ET61	15679.2	141203	6214.12	20700.7	18124.4	16485.6	31101.6	22873.5	36656.4	279373	13657.1	22764
Q9JJS8	40159	31163.7	33853.2	37646.2	53456.4	19998.1	36311.9	82146.4	74531.3	627166	112339	38711.7
Q9JLJ3	35543.2	9111.11	8731.93	10775.8	53754.2	6032.49	3328.44	46554.2	193597	55139428	92387.3	50346.8
Q9QUH3	14324.4	10750.6	7555.95	14042	10863.7	13973.5	9842.58	13334	14558.4	89515.1	10706.8	19692.3
Q9QW30	9232.49	11216	212914	16663.2	3081.73	16488	9752.7	2079.87	16135	303161	17086.3	7607.69
Q9QX79	4841667	3.2477e+06	4.33594e+06	2868678	2.22569e+06	2.64085e+06	2.72855e+06	1.4398e+06	2.63471e+06	36972632	1.3391e+06	3.02502e+06
Q9QXU9	48724.7	96473.6	86458.2	110515	61700.9	55019.2	38683.5	18226.7	22414.3	315362	15037.9	36273.7
Q9QYV0	7975.3	8890.16	6634.82	6731.53	8882.04	4699.45	14130.5	11555.9	8538.05	126474	20700.8	11109.3
Q9QZ76	9696.97	3879.6	3883.41	13292.3	3242.2	2851.84	16565.9	8943.65	4695.76	188382	8166.11	8207.51
Q9QZQ5	79439.4	138589	140141	215575	83664.2	595567	41700.8	19979.5	52637.5	140819	25079.5	49563.2
Q9R063	7388.14	18039.6	13204.2	6631.21	3633.61	15254.4	59735	2547.6	31312.7	944964	10774.5	17352.2
Q9R0D6	4908.55	8441.57	7947.54	14284.7	8485.53	8131.9	6122.04	4844.51	8070.38	170936	9219.98	10890.5
Q9R0T4	18998.1	24509.8	21573	21666.8	21247.1	8062.33	9427.35	12886.4	9710	134090	41452.7	15634.9
Q9R172	12591.3	17448.4	12211.2	15319.6	6328.4	22570.4	17599.9	12378.2	17302	55713.8	13134.2	27307.6
Q9R1E9	114203	106949	134083	128392	100823	315993	88741.1	16399.5	106034	70508.7	50106.5	55595
Q9R1T3	5852.04	4563.91	3314.39	9759.87	4926.5	8905.96	7126.15	7163.21	4936.49	87422.7	3767.51	10076.9
Q9WTS8	55206.9	45678.7	55131.1	58584.5	31197.6	15235.3	59157.8	67539.8	61838.6	1.00868e+06	74647.2	50936.7
Q9WTT6	4298.33	6161.92	7111.71	8124.1	12246	13649	8823.99	1822.36	2951.21	75989.8	3215.66	18246.1
Q9WTV5	31798.2	18256.2	22689	33481.7	68639.9	115747	15739.4	10050.5	6731.64	197350	14399.4	22438.1
Q9WU49	23924.1	35426	20771	29856.6	60492.2	53099.3	12707.9	13243.1	13904.3	22573.6	22059.1	39406
Q9WUC4	5421.54	25786.1	29655.9	15970.8	14738.4	41389.2	5385.61	11818.3	29148.6	831341	5433.26	19252.6
Q9WUH4	11265.4	30483.3	24646.5	37561.1	22740.9	23372.6	6059.9	12416.8	10981.7	201551	10982	29637.8
Q9WUQ1	25273.3	21959.4	43719.3	45202.2	26335.4	89389.9	37587	16921.4	24179.3	282736	36956.9	37336
Q9WUW3	528796	485234	920158	713029	405962	657033	682400	163442	784425	5690538	231199	687407
Q9WVH8	35057.2	19889.5	8992.42	25108.8	28463	21917.8	8265.33	17393.3	44930.6	491772	3502.41	37516.6
Q9WVT0	25903.1	10109.1	22877	17781.2	7979.51	3286.42	16442.9	33431.7	17515	100549	37662.4	21515.5
Q9Z0V6	26594	22150.6	9978.62	22306.1	47817.5	115020	5426.79	22520.8	30689.5	382433	35796.9	40702.7
Q9Z1Y3	36782.6	47261.1	88783.7	88567.9	51987.7	166123	40609.4	38727.6	35054.5	336659	38988.6	21979
Q9Z2G8	20244	15224.6	5444.44	17503.6	69909.6	7295.75	12022.9	42015	29004.3	571544	50445.9	14361.8
Q9Z339	14573	18101.3	92599.8	10496.5	18365.1	91856.8	200252	174187	25545	3.16341e+06	208067	207018

## Sheet: Differential proteins
Entry Name	Protein names	Gene Names	Uniprot Accession	p.t.test	p.adjust.BH	Fold.Change	AUC
MINP1_RAT	Multiple inositol polyphosphate phosphatase 1	Minpp1	O35217	0.00260637	0.0296639	4.17974	1
AMYP_RAT	Pancreatic alpha-amylase	Amy2	P00689	0.00284585	0.0299289	4.06189	1
ANGT_RAT	Angiotensinogen	Agt Serpina8	P01015	0.000932951	0.0162138	6.9143	1
CO1A2_RAT	Collagen alpha-2(I) chain	Col1a2	P02466	0.000229509	0.0100631	5.19423	1
APOE_RAT	Apolipoprotein E (Apo-E)	Apoe	P02650	0.00436123	0.0394588	6.69158	0.94
APOA4_RAT	Apolipoprotein A-IV	Apoa4	P02651	0.000102052	0.00646326	9.05238	1
CLUS_RAT	Clusterin	Clu	P05371	0.000824108	0.016198	11.3721	1
CO4_RAT	Complement C4	C4 C4a	P08649	0.00154098	0.0214234	4.5272	0.97
EST1C_RAT	Carboxylesterase 1C	Ces1c Es2	P10959	0.00225252	0.0285319	16.4391	0.94
KLKB1_RAT	Plasma kallikrein	Klkb1 Klk3 Pk	P14272	0.00424911	0.0390644	3.94166	0.94
HA11_RAT	Class I histocompatibility antigen	RT1-Aw2	P15978	0.00258993	0.0296639	5.39598	0.97
FUCO_RAT	Tissue alpha-L-fucosidase	Fuca1 Fuca	P17164	0.00495905	0.0428282	6.27345	0.94
PSA2_RAT	Proteasome subunit alpha type-2	Psma2	P17220	0.00707711	0.0498019	4.30142	0.89
IGHG1_RAT	Ig gamma-1 chain C region		P20759	0.000304554	0.0108497	6.41217	1
PSA4_RAT	Proteasome subunit alpha type-4	Psma4	P21670	0.00640306	0.0467916	5.75063	0.94
APOD_RAT	Apolipoprotein D	Apod	P23593	0.000249934	0.0101759	24.9713	1
GPX3_RAT	Glutathione peroxidase 3	Gpx3	P23764	0.00041135	0.0130261	6.39721	1
THBG_RAT	Thyroxine-binding globulin	Serpina7 Tbg	P35577	2.08321e-05	0.00237486	26.2748	1
AFAM_RAT	Afamin (Alpha-albumin)	Afm	P36953	1.46087e-05	0.00237486	8.51979	1
RL13_RAT	Large ribosomal subunit protein eL13	Rpl13	P41123	0.00107938	0.0170902	9.63374	1
ITB1_RAT	Integrin beta-1	Itgb1	P49134	0.00183765	0.0238059	8.19927	0.97
CO8B_RAT	Complement component C8 beta chain	C8b	P55314	0.00598084	0.0458831	11.9053	0.94
APOC4_RAT	Apolipoprotein C-IV	Apoc4 Ecl	P55797	0.00171957	0.0227943	12.7441	0.97
ANTR1_RAT	Anthrax toxin receptor 1	Antxr1	Q0PMD2	0.000501526	0.0136129	5.31108	1
CCDB1_RAT	Cyclin-D1-binding protein 1	Ccndbp1	Q5BK06	0.00621466	0.0460046	4.09203	0.92
AMBN_RAT	Ameloblastin	Ambn	Q62840	6.44005e-05	0.00524404	18.5096	1
ECM1_RAT	Extracellular matrix protein 1	Ecm1	Q62894	0.000964009	0.0162138	4.52308	1
CO9_RAT	Complement component C9	C9	Q62930	0.00424723	0.0390644	7.87381	1
A1M_RAT	Alpha-1-macroglobulin	A1m Pzp	Q63041	0.00569881	0.045588	5.03354	0.94
ITIH3_RAT	Inter-alpha-trypsin inhibitor heavy chain H3	Itih3	Q63416	0.00484966	0.0425278	4.52106	1
ZA2G_RAT	Zinc-alpha-2-glycoprotein	Azgp1	Q63678	0.00575848	0.045588	4.53464	0.97
HEP2_RAT	Heparin cofactor 2	Serpind1 Hcf2	Q64268	0.000556825	0.0138428	9.66753	1
PTPRS_RAT	Receptor-type tyrosine-protein phosphatase S	Ptprs	Q64605	4.76245e-05	0.00452433	3.31929	1
NPL_RAT	N-acetylneuraminate lyase	Npl	Q66H59	0.00165221	0.0224229	5.69094	0.97
CBPQ_RAT	Carboxypeptidase Q	Cpq Pgcp	Q6IRK9	0.00243395	0.0296639	4.98141	0.94
QSOX1_RAT	Sulfhydryl oxidase 1	Qsox1 Qscn6 Sox2	Q6IUU3	0.00515227	0.0438328	3.67729	1
APOB_RAT	Apolipoprotein B-100	Apob Aa1064 Ac1-060	Q7TMA5	0.000404799	0.0130261	5.58508	1
SPA11_RAT	Serpin A11	Serpina11 Ab1-046	Q7TPA5	0.00603725	0.0458831	3.84923	0.97
FA7_RAT	Coagulation factor VII	F7	Q8K3U6	0.00127561	0.0181774	10.7054	1
CBPN_RAT	Carboxypeptidase N catalytic chain	Cpn1	Q9EQV8	0.00121925	0.0178198	7.78941	1
ADA15_RAT	Disintegrin and metalloproteinase domain-containing protein 15	Adam15 Mdc15	Q9QYV0	0.00363583	0.0351258	4.39383	0.97
GSTO1_RAT	Glutathione S-transferase omega-1	Gsto1	Q9Z339	0.00541569	0.0453962	16.1732	0.94
DLK1_RAT	Protein delta homolog 1	Dlk1 Dlk Pref1 Zog	O70534	0.000125159	0.00671116	0.299879	1
HBA_RAT	Hemoglobin subunit alpha-1/2	Hba1 Hba-a1	P01946	0.000868965	0.0162138	0.417568	1
LDHA_RAT	L-lactate dehydrogenase A chain	Ldha Ldh-1 Ldh1	P04642	0.00558669	0.0455332	0.392139	0.94
RS21_RAT	Small ribosomal subunit protein eS21	Rps21	P05765	0.00270618	0.0296639	0.367003	1
HPT_RAT	Haptoglobin	Hp Ba1-647	P06866	0.00293537	0.0299289	0.278481	1
SODC_RAT	Superoxide dismutase [Cu-Zn]	Sod1	P07632	0.000443855	0.0133157	0.296331	1
ACBP_RAT	Acyl-CoA-binding protein	Dbi	P11030	0.000729618	0.0148529	0.313607	1
THIO_RAT	Thioredoxin	Txn Txn1	P11232	0.000940925	0.0162138	0.258829	1
HBB2_RAT	Hemoglobin subunit beta-2	0	P11517	0.000200912	0.0095433	0.293401	1
IBP1_RAT	Insulin-like growth factor-binding protein 1	Igfbp1 Igfbp-1	P21743	0.000698732	0.0148529	0.258233	0.97
CBG_RAT	Corticosteroid-binding globulin	Serpina6 Cbg	P31211	1.26489e-05	0.00237486	0.102162	1
PRDX2_RAT	Peroxiredoxin-2	Prdx2 Tdpx1	P35704	0.00106965	0.0170902	0.314882	0.94
FABP5_RAT	Fatty acid-binding protein 5	Fabp5	P55053	0.00010194	0.00646326	0.391569	1
RS27A_RAT	Ubiquitin-ribosomal protein eS31 fusion protein	Rps27a Uba80 Ubcep1	P62982	0.000129514	0.00671116	0.296083	1
PRDX1_RAT	Peroxiredoxin-1	Prdx1 Tdpx2	Q63716	8.58018e-06	0.00237486	0.416171	1
HEPC_RAT	Hepcidin	Hamp Hepc	Q99MH3	0.00717789	0.0498951	0.279739	0.92
CCN3_RAT	CCN family member 3	Ccn3 Nov	Q9QZQ5	0.00247434	0.0296639	0.263197	1

## Sheet: P<0.05;p.adjust.BH>0.05
Entry name	Protein names	Gene names		T1-1	T1-2	T1-3	T1-4	T1-5	T1-6	T2-1	T2-2	T2-3	T2-4	T2-5	T2-6	P	p.adjust.BH	FC	AUC
NUDT5_RAT	ADP-sugar pyrophosphatase (EC 3.6.1.13) (8-oxo-dGDP phosphatase) (EC 3.6.1.58) (Nuclear ATP-synthesis protein NUDIX5) (EC 2.7.7.96) (Nucleoside diphosphate-linked moiety X motif 5) (Nudix motif 5)	Nudt5	Q6AY63	13.5589	14.9901	13.4491	14.2776	15.2841	15.5958	18.2777	18.8036	13.2103	23.3199	18.6915	14.8422	0.0490342	0.13551	70.9261	0.75
APOC3_RAT	Apolipoprotein C-III (Apo-CIII) (ApoC-III) (Apolipoprotein C3)	Apoc3	P06759	13.2873	17.2446	14.1249	11.0217	16.5409	15.7151	17.9762	20.5449	19.2332	18.2404	17.0529	16.2739	0.0103081	0.102919	8.75926	0.91667
CAN1_RAT	Calpain-1 catalytic subunit (EC 3.4.22.52) (Calcium-activated neutral proteinase 1) (CANP 1) (Calpain mu-type) (Calpain-1 large subunit) (Micromolar-calpain) (muCANP)	Capn1 Cls1	P97571	15.7533	15.2603	15.591	15.0849	15.8969	12.6895	15.2507	15.8765	17.3187	20.4594	17.8906	16.496	0.0366038	0.0739373	8.28468	0.86111
MUC18_RAT	Cell surface glycoprotein MUC18 (Gicerin) (Melanoma cell adhesion molecule) (Melanoma-associated antigen MUC18) (CD antigen CD146)	Mcam Muc18	Q9EPF2	11.2524	14.3497	14.0212	11.9339	13.6673	11.0284	16.4746	14.6685	13.104	17.6736	13.5653	15.1625	0.027362	0.093466	6.50954	0.83333
RS10_RAT	40S ribosomal protein S10	Rps10	P63326	11.7635	12.9323	11.6543	13.956	13.3777	16.513	15.5334	15.0311	15.3205	19.3746	14.6191	15.5285	0.0318123	0.0775182	6.49452	0.86111
PON1_RAT	Serum paraoxonase/arylesterase 1 (PON 1) (EC 3.1.1.2) (EC 3.1.1.81) (EC 3.1.8.1) (Aromatic esterase 1) (A-esterase 1) (Serum aryldialkylphosphatase 1)	Pon1 Pon	P55159	16.2861	15.0104	15.0075	14.182	14.0376	17.915	17.5776	16.9135	17.7778	20.7798	17.7074	17.5375	0.0091405	0.0643385	6.41543	0.86111
HEMO_RAT	Hemopexin	Hpx	P20059	21.6406	20.8653	19.1337	18.6048	20.4431	22.0078	22.2556	21.638	22.6746	25.554	22.3329	22.4627	0.0133461	0.0675565	6.38277	0.94444
S10AB_RAT	Protein S100-A11 (Calgizzarin) (S100 calcium-binding protein A11)	S100a11	Q6B345	13.9836	11.9069	14.1039	12.372	13.9387	14.8095	14.7032	15.1345	15.1027	18.5658	14.9132	14.4952	0.0293881	0.0602909	6.17877	0.94444
ANXA2_RAT	Annexin A2 (Annexin II) (Annexin-2) (Calpactin I heavy chain) (Calpactin-1 heavy chain) (Chromobindin-8) (Lipocortin II) (Placental anticoagulant protein IV) (PAP-IV) (Protein I) (p36)	Anxa2 Anx2	Q07936	10.8434	11.8349	9.27411	12.0911	14.3494	11.9495	13.4461	13.0574	12.7625	17.0378	14.902	14.5374	0.0210033	0.0656781	6.10685	0.91667
APOM_RAT	Apolipoprotein M (Apo-M) (ApoM) (Protein Px)	Apom	P14630	19.0102	19.0062	20.8412	20.1946	19.1757	18.7819	20.3135	20.5608	20.7591	24.3402	20.803	20.5798	0.0357736	0.0594588	5.65293	0.86111
ACE_RAT	Angiotensin-converting enzyme (ACE) (EC 3.2.1.-) (EC 3.4.15.1) (Dipeptidyl carboxypeptidase I) (Kininase II) (CD antigen CD143) [Cleaved into: Angiotensin-converting enzyme, soluble form]	Ace Dcp1	P47820	12.9338	11.9201	12.7551	11.1214	11.9868	12.3043	12.8126	14.8221	14.1369	16.5348	13.8187	11.831	0.0292053	0.105326	5.58181	0.83333
F13A_RAT	Coagulation factor XIII A chain (Coagulation factor XIIIa) (EC 2.3.2.13) (Protein-glutamine gamma-glutamyltransferase A chain) (Transglutaminase A chain)	F13a1 F13a	O08619	15.3598	15.2141	15.2827	14.0293	12.6568	14.9195	16.6011	15.4205	15.5292	19.3593	15.5565	15.7066	0.0406805	0.105095	5.54182	1
RABP1_RAT	Cellular retinoic acid-binding protein 1 (Cellular retinoic acid-binding protein I) (CRABP-I)	Crabp1	P62966	11.2626	12.3652	11.5646	11.9269	11.8697	10.8315	12.5065	13.141	13.235	16.2003	13.1419	11.2109	0.046269	0.0774892	5.4994	0.86111
MRC2_RAT	C-type mannose receptor 2 (Endocytic receptor 180) (Macrophage mannose receptor 2) (CD antigen CD280)	Mrc2 Endo180	Q4TU93	13.5408	13.1138	13.2558	13.6429	13.5928	10.821	14.3658	14.4224	14.1535	17.2259	15.2931	14.7249	0.0101328	0.0680994	4.89945	1
PRVA_RAT	Parvalbumin alpha	Pvalb Pva	P02625	14.108	13.4924	13.3947	12.4515	13.448	12.4826	14.9978	13.6957	13.5052	17.3536	13.88	15.0515	0.0400774	0.069839	4.38944	0.91667
CSF1R_RAT	Macrophage colony-stimulating factor 1 receptor (CSF-1 receptor) (CSF-1-R) (CSF-1R) (M-CSF-R) (EC 2.7.10.1) (Proto-oncogene c-Fms) (CD antigen CD115)	Csf1r Csfmr Fms	Q00495	16.938	16.9113	15.8133	16.1485	16.2664	14.8437	17.1577	17.2009	16.4801	20.3299	17.7211	17.4576	0.0325305	0.0775182	4.31456	0.94444
THYG_RAT	Thyroglobulin (Tg)	Tg	P06882	13.4863	14.7293	14.4864	12.1792	13.6883	14.4491	14.9634	14.7047	14.6391	18.0018	15.9106	14.7766	0.0305625	0.0680994	4.28594	0.94444
IGG2A_RAT	Ig gamma-2A chain C region	Igg-2a	P20760	21.7925	21.7699	21.8991	21.981	20.2878	20.2512	22.8223	21.8541	22.3598	25.5292	22.3709	22.395	0.0348934	0.102919	4.27024	0.94444
LOX15_RAT	Polyunsaturated fatty acid lipoxygenase ALOX15 (12/15-lipoxygenase) (Arachidonate 12-lipoxygenase, leukocyte-type) (12-LOX) (EC 1.13.11.31) (Arachidonate 15-lipoxygenase) (15-LOX) (EC 1.13.11.33) (Arachidonate omega-6 lipoxygenase) (Hepoxilin A3 synthase Alox15) (EC 1.13.11.-) (Linoleate 13S-lipoxygenase) (EC 1.13.11.12)	Alox15 Alox12l	Q02759	14.4216	13.5146	11.7258	13.4706	14.4251	14.4885	15.3448	13.3215	15.1739	17.2992	15.255	16.5927	0.0275403	0.0945013	4.15569	0.86111
RELN_RAT	Reelin (EC 3.4.21.-)	Reln	P58751	14.4438	13.9343	14.2227	14.5689	13.9066	12.9952	14.9632	14.0282	15.2301	18.0268	15.3751	14.9858	0.0388636	0.0633694	4.09107	0.91667
VWF_RAT	von Willebrand factor (vWF) (Fragment)	Vwf	Q62935	15.1571	15.3341	15.5947	14.1582	14.9757	13.9572	17.4212	16.2974	15.6747	18.0365	17.1367	15.6773	0.00327708	0.0938269	3.99356	1
COBA1_RAT	Collagen alpha-1(XI) chain	Col11a1	P20909	13.6897	13.5786	15.0933	14.8273	15.289	12.66	14.919	15.427	15.7119	18.0475	16.2595	15.4031	0.0172094	0.0720277	3.83438	0.94444
PTPRF_RAT	Receptor-type tyrosine-protein phosphatase F (EC 3.1.3.48) (Leukocyte common antigen related) (LAR)	Ptprf Lar	Q64604	13.4095	12.8184	13.1909	12.9376	16.198	10.9829	14.279	16.8717	16.3418	15.6534	17.0147	13.6907	0.0229216	0.206661	3.73354	0.91667
IGG2B_RAT	Ig gamma-2B chain C region (Immunoglobulin heavy chain 1a)	Igh-1a	P20761	22.2361	21.9878	22.2609	21.6194	20.9558	20.113	22.5659	22.7236	22.1913	25.4417	22.2077	22.4563	0.0459078	0.147981	3.612	0.88889
GUC2A_RAT	Guanylin (Guanylate cyclase activator 2A)	Guca2a Guca2	P28902	13.154	14.2071	13.8449	13.4404	13.8107	11.641	14.6116	14.5363	13.9585	17.0342	15.19	14.1064	0.0252799	0.105095	3.5556	0.94444
CNTN1_RAT	Contactin-1 (Neural cell surface protein F3)	Cntn1	Q63198	14.8107	13.9472	14.5269	14.6614	14.6577	14.1262	15.882	16.0471	15.1139	17.1976	16.7008	15.2636	0.00131038	0.123193	3.33665	1
LAC2_RAT	Ig lambda-2 chain C region		P20767	19.8991	19.8711	19.7532	19.0805	19.8119	19.275	20.5952	19.7082	19.8341	22.2275	21.5444	22.0676	0.0154696	0.191997	3.193	0.83333
LG3BP_RAT	Galectin-3-binding protein (Cyp-C-associated protein) (CyCAP) (Lectin galactoside-binding soluble 3-binding protein) (Mac-2-binding protein) (MAC2BP) (Mac-2 BP) (Protein 90K)	Lgals3bp	O70513	15.4956	14.5979	13.3762	14.777	15.4982	13.8808	15.7368	15.295	15.344	17.7669	16.6798	15.4569	0.022057	0.132137	2.97762	0.83333
MBL2_RAT	Mannose-binding protein C (MBP-C) (Mannan-binding protein) (Ra-reactive factor polysaccharide-binding component p28A) (RaRF p28A)	Mbl2	P08661	16.3468	16.0241	16.1268	16.459	16.0625	16.4214	17.6148	16.4069	17.922	18.8117	16.608	17.9093	0.00600299	0.143057	2.86878	0.94444
CO3_RAT	Complement C3 [Cleaved into: Complement C3 beta chain; C3-beta-c (C3bc) (Neutrophil chemotactic factor-2) (ENCF-2); Complement C3 alpha chain; C3a anaphylatoxin (Neutrophil chemotactic factor-1) (ENCF-1); Acylation stimulating protein (ASP) (C3adesArg); Complement C3b alpha' chain; Complement C3c alpha' chain fragment 1; Complement C3dg fragment; Complement C3g fragment; Complement C3d fragment; …	C3	P01026	23.8907	24.0463	24.1863	24.0348	24.0339	23.3195	24.0956	24.8023	24.816	26.9259	25.4844	24.3721	0.0231104	0.124988	2.81895	0.97222
SAMP_RAT	Serum amyloid P-component (SAP)	Apcs Ptx2 Sap	P23680	19.0708	18.6967	18.2618	18.0759	19.0025	16.3339	19.5073	19.6355	20.2916	20.5975	19.9988	19.275	0.00519463	0.188283	2.81143	1
NPY_RAT	Pro-neuropeptide Y [Cleaved into: Neuropeptide Y (Neuropeptide tyrosine) (NPY); C-flanking peptide of NPY (CPON)]	Npy	P07808	16.8746	16.7628	16.3991	16.752	15.9087	16.9805	16.449	17.5047	18.1291	19.46	17.5741	17.9731	0.0172041	0.135396	2.80415	0.88889
PEPD_RAT	Xaa-Pro dipeptidase (X-Pro dipeptidase) (EC 3.4.13.9) (Imidodipeptidase) (Peptidase D) (Proline dipeptidase) (Prolidase)	Pepd	Q5I0D7	14.5107	15.3122	13.9862	13.8957	14.1425	13.1155	14.9325	15.1156	16.1521	16.7617	14.7075	15.2968	0.0125872	0.193016	2.59453	0.88889
C4BPA_RAT	C4b-binding protein alpha chain (C4bp)	C4bpa	Q63514	19.034	18.5942	17.4598	17.6334	17.8088	18.1597	19.4987	17.7583	19.0809	20.8561	19.4713	19.2352	0.0296774	0.201093	2.58844	0.88889
AGRF5_RAT	Adhesion G protein-coupled receptor F5 (G-protein coupled hepta-helical receptor Ig-hepta) (G-protein coupled receptor 116)	Adgrf5 Gpr116 Gprhep	Q9WVT0	14.6608	13.3034	14.4816	14.1181	12.9621	11.6823	14.0052	15.0289	14.0963	16.6175	15.2008	14.3931	0.0497749	0.27637	2.58274	0.77778
HRG_RAT	Histidine-rich glycoprotein (Histidine-proline-rich glycoprotein) (HPRG) (Histidine-rich glycoprotein 1) (HRG1)	Hrg Hrg1	Q99PS8	21.0661	20.5883	21.1202	20.49	20.1287	20.8052	21.8753	20.7234	22.2937	23.355	20.7194	21.8397	0.0300501	0.211292	2.5639	0.83333
CO6_RAT	Complement component C6	C6	Q811M5	16.5934	16.9831	16.1965	16.5173	15.4325	17.357	17.3165	16.5778	17.5473	19.177	17.8648	17.4821	0.0268947	0.201093	2.4073	0.88889
PSB3_RAT	Proteasome subunit beta type-3 (EC 3.4.25.1) (Proteasome chain 13) (Proteasome component C10-II) (Proteasome theta chain)	Psmb3	P40112	13.2543	13.0162	11.6862	13.6132	13.1127	11.7504	12.9883	15.126	14.0329	14.2014	13.7146	13.5071	0.023527	0.421001	2.26416	0.86111
LIPL_RAT	Lipoprotein lipase (LPL) (EC 3.1.1.34) (Phospholipase A1) (EC 3.1.1.32)	Lpl	Q06000	16.2017	12.5298	12.2985	13.0118	11.9237	11.9579	14.0089	14.0643	14.4225	16.7573	14.4452	14.9064	0.0467107	0.240096	2.14135	0.86111
UBA1_RAT	Ubiquitin-like modifier-activating enzyme 1 (EC 6.2.1.45) (Ubiquitin-activating enzyme E1)	Uba1 Ube1	Q5U300	15.2488	15.2841	14.9242	15.5136	16.1783	15.1883	13.8081	13.8848	13.5699	14.8077	14.5293	15.1787	0.00589412	0.143057	0.488609	0.97222
SYDC_RAT	Aspartate--tRNA ligase, cytoplasmic (EC 6.1.1.12) (Aspartyl-tRNA synthetase) (AspRS)	Dars1 Dars Drs1	P15178	14.6315	14.9301	14.2111	14.5115	14.4982	14.3724	12.2461	9.95955	11.449	14.9046	13.6282	13.9478	0.0342554	0.0597486	0.473122	0.86111
CCN2_RAT	CCN family member 2 (Cellular communication network factor 2) (Connective tissue growth factor) (Connective tissue growth-related protein)	Ccn2 Ctgf	Q9R1E9	16.8012	16.7066	17.0328	16.9702	16.6215	18.2695	16.4373	14.0014	16.6942	16.1055	15.6127	15.7627	0.0186092	0.150695	0.430215	0.97222
IBP3_RAT	Insulin-like growth factor-binding protein 3 (IBP-3) (IGF-binding protein 3) (IGFBP-3)	Igfbp3 Igfbp-3	P15473	16.3708	16.3732	17.2529	17.304	16.5457	18.1407	16.302	13.8542	16.5059	15.7019	15.4372	16.4139	0.0265251	0.191997	0.42836	0.88889
IBP2_RAT	Insulin-like growth factor-binding protein 2 (IBP-2) (IGF-binding protein 2) (IGFBP-2) (BRL-BP)	Igfbp2 Igfbp-2	P12843	19.957	19.8685	20.4423	20.7225	19.9305	21.6079	19.5408	17.2211	18.9075	19.9753	18.2301	19.7471	0.0155571	0.0680994	0.388781	0.91667

## Sheet: Gene ontology (GO) categories
Category	Term	Count	%	PValue	Genes	List Total	Pop Hits	Pop Total	Fold Enrichment	Bonferroni	Benjamini	FDR
GOTERM_BP_DIRECT	GO:0042744~hydrogen peroxide catabolic process	7	11.1111	2.73119e-10	P35704, P01946, P11517, Q63716, P23764, P02651	62	29	20099	78.2497	2.06478e-07	2.06478e-07	2.00742e-07
GOTERM_BP_DIRECT	GO:0098869~cellular oxidant detoxification	8	12.6984	3.08701e-09	P02650, P35704, Q9Z339, P06866, P01946, P11517, P23764	62	76	20099	34.1239	2.33377e-06	1.16689e-06	1.13448e-06
GOTERM_BP_DIRECT	GO:1905920~positive regulation of CoA-transferase activity	4	6.34921	1.47353e-06	P02650, P11030, P01015, P02651	62	8	20099	162.089	0.00111337	0.000371329	0.000361014
GOTERM_BP_DIRECT	GO:0006869~lipid transport	6	9.52381	1.66697e-05	P02650, P23593, P55797, Q7TMA5, P55053, P02651	62	105	20099	18.5244	0.0125233	0.00265319	0.00257949
GOTERM_BP_DIRECT	GO:0019430~removal of superoxide radicals	4	6.34921	1.75476e-05	P35704, Q63716, P07632, P02651	62	17	20099	76.277	0.0131785	0.00265319	0.00257949
GOTERM_BP_DIRECT	GO:0042542~response to hydrogen peroxide	5	7.93651	0.000107267	P04642, P06866, P01946, P07632	62	81	20099	20.011	0.0778969	0.0135157	0.0131402
GOTERM_BP_DIRECT	GO:0097421~liver regeneration	5	7.93651	0.000135373	Q99MH3, P41123, P14272	62	86	20099	18.8475	0.0972857	0.0146203	0.0142142
GOTERM_BP_DIRECT	GO:0042246~tissue regeneration	4	6.34921	0.00016245	P23593, Q9QYV0, P21743, Q6IRK9	62	35	20099	37.0488	0.115579	0.0148542	0.0144416
GOTERM_BP_DIRECT	GO:0006958~complement activation, classical pathway	4	6.34921	0.000176835	Q62930, P08649, P55314, P20759	62	36	20099	36.0197	0.125147	0.0148542	0.0144416
GOTERM_BP_DIRECT	GO:0009410~response to xenobiotic stimulus	9	14.2857	0.00027747	P04642, P23593, P06866, P49134, P23764, P35577, P11232, P07632	62	560	20099	5.20999	0.189251	0.0209767	0.020394
GOTERM_BP_DIRECT	GO:0030185~nitric oxide transport	3	4.7619	0.000321739	P01946, P11517	62	9	20099	108.059	0.215943	0.0221123	0.021498
GOTERM_BP_DIRECT	GO:0015670~carbon dioxide transport	3	4.7619	0.000586405	P01946, P11517	62	12	20099	81.0444	0.358183	0.0341017	0.0331544
GOTERM_BP_DIRECT	GO:0014012~peripheral nervous system axon regeneration	3	4.7619	0.000586405	P02650, P23593, P02651	62	12	20099	81.0444	0.358183	0.0341017	0.0331544
GOTERM_BP_DIRECT	GO:0015671~oxygen transport	3	4.7619	0.00134355	P01946, P11517	62	18	20099	54.0296	0.638107	0.0725516	0.0705363
GOTERM_BP_DIRECT	GO:0006979~response to oxidative stress	5	7.93651	0.00173367	P02650, P35704, Q63716, P23764, P07632	62	169	20099	9.59105	0.730664	0.0873772	0.08495
GOTERM_BP_DIRECT	GO:0000302~response to reactive oxygen species	3	4.7619	0.00259867	P23593, Q63716, P07632	62	25	20099	38.9013	0.860145	0.115564	0.112354
GOTERM_BP_DIRECT	GO:0010269~response to selenium ion	3	4.7619	0.00259867	Q7TMA5, P23764, P11232	62	25	20099	38.9013	0.860145	0.115564	0.112354
GOTERM_BP_DIRECT	GO:0006956~complement activation	3	4.7619	0.00280974	Q62930, P08649, P55314	62	26	20099	37.4051	0.880824	0.118009	0.114731
GOTERM_BP_DIRECT	GO:0014070~response to organic cyclic compound	6	9.52381	0.00320524	P04642, Q8K3U6, P06866, P23764, P21743	62	329	20099	5.91205	0.911703	0.127153	0.123621
GOTERM_BP_DIRECT	GO:0006629~lipid metabolic process	5	7.93651	0.00336384	P02650, P23593, Q7TMA5, P17164, P55053	62	203	20099	7.98467	0.921711	0.127153	0.123621
GOTERM_BP_DIRECT	GO:0042157~lipoprotein metabolic process	3	4.7619	0.00373153	P02650, Q7TMA5, P02651	62	30	20099	32.4177	0.940769	0.134335	0.130604
GOTERM_BP_DIRECT	GO:0033344~cholesterol efflux	3	4.7619	0.00398112	P02650, Q7TMA5, P02651	62	31	20099	31.372	0.95099	0.136806	0.133006
GOTERM_BP_DIRECT	GO:0043524~negative regulation of neuron apoptotic process	5	7.93651	0.00433465	P02650, P35704, P05371, P01015, P07632	62	218	20099	7.43526	0.962526	0.142478	0.13852
GOTERM_BP_DIRECT	GO:0045454~cell redox homeostasis	3	4.7619	0.00477506	P35704, Q63716, P11232	62	34	20099	28.6039	0.97318	0.150414	0.146236
GOTERM_BP_DIRECT	GO:0048821~erythrocyte development	3	4.7619	0.0056358	P01946, P11517	62	37	20099	26.2847	0.986056	0.170426	0.165692
GOTERM_BP_DIRECT	GO:1902998~positive regulation of neurofibrillary tangle assembly	2	3.1746	0.00606089	P02650, P05371	62	2	20099	324.177	0.989908	0.176232	0.171337
GOTERM_BP_DIRECT	GO:0001824~blastocyst development	3	4.7619	0.00688522	P41123	62	41	20099	23.7203	0.99461	0.192786	0.187431
GOTERM_BP_DIRECT	GO:0048662~negative regulation of smooth muscle cell proliferation	3	4.7619	0.00755273	P02650, P23593, P01015	62	43	20099	22.617	0.996758	0.203924	0.198259
GOTERM_BP_DIRECT	GO:1900221~regulation of amyloid-beta clearance	2	3.1746	0.00907778	P02650, P05371	62	3	20099	216.118	0.998986	0.22876	0.222406
GOTERM_BP_DIRECT	GO:0045321~leukocyte activation	2	3.1746	0.00907778	P35704, Q63716	62	3	20099	216.118	0.998986	0.22876	0.222406
GOTERM_BP_DIRECT	GO:0050728~negative regulation of inflammatory response	4	6.34921	0.00975405	P02650, Q99MH3, Q9QZQ5, P07632	62	145	20099	8.94283	0.999395	0.237873	0.231265
GOTERM_BP_DIRECT	GO:0019661~glucose catabolic process to lactate via pyruvate	2	3.1746	0.0120857	P04642	62	4	20099	162.089	0.999898	0.285523	0.277592
GOTERM_BP_DIRECT	GO:0045429~positive regulation of nitric oxide biosynthetic process	3	4.7619	0.0134294	P02650, P05371, P01015	62	58	20099	16.7678	0.999964	0.307655	0.299109
GOTERM_BP_DIRECT	GO:0034372~very-low-density lipoprotein particle remodeling	2	3.1746	0.0150845	P02650, P02651	62	5	20099	129.671	0.99999	0.316775	0.307976
GOTERM_BP_DIRECT	GO:0042867~pyruvate catabolic process	2	3.1746	0.0150845	P04642	62	5	20099	129.671	0.99999	0.316775	0.307976
GOTERM_BP_DIRECT	GO:0055090~acylglycerol homeostasis	2	3.1746	0.0150845	P02650, P02651	62	5	20099	129.671	0.99999	0.316775	0.307976
GOTERM_BP_DIRECT	GO:0042981~regulation of apoptotic process	4	6.34921	0.0156603	P02650, P35704, P05371, P01015	62	173	20099	7.49543	0.999993	0.319977	0.311089
GOTERM_BP_DIRECT	GO:0071402~cellular response to lipoprotein particle stimulus	2	3.1746	0.0180745	P02650, Q7TMA5	62	6	20099	108.059	0.999999	0.359587	0.349599
GOTERM_BP_DIRECT	GO:0048678~response to axon injury	3	4.7619	0.0186584	P23593, P11232, P07632	62	69	20099	14.0947	0.999999	0.361685	0.351638
GOTERM_BP_DIRECT	GO:0048659~smooth muscle cell proliferation	2	3.1746	0.0210555	Q9QZQ5, P01015	62	7	20099	92.6221	1	0.378999	0.368471
GOTERM_BP_DIRECT	GO:0042158~lipoprotein biosynthetic process	2	3.1746	0.0210555	P02650, Q7TMA5	62	7	20099	92.6221	1	0.378999	0.368471
GOTERM_BP_DIRECT	GO:0042159~lipoprotein catabolic process	2	3.1746	0.0210555	P02650, Q7TMA5	62	7	20099	92.6221	1	0.378999	0.368471
GOTERM_BP_DIRECT	GO:0031667~response to nutrient levels	4	6.34921	0.0217331	Q8K3U6, P49134, P35577, P07632	62	196	20099	6.61587	1	0.382098	0.371484
GOTERM_BP_DIRECT	GO:0097068~response to thyroxine	2	3.1746	0.0240276	Q8K3U6, P11232	62	8	20099	81.0444	1	0.403664	0.392451
GOTERM_BP_DIRECT	GO:0019674~NAD metabolic process	2	3.1746	0.0240276	P04642	62	8	20099	81.0444	1	0.403664	0.392451
GOTERM_BP_DIRECT	GO:0001568~blood vessel development	3	4.7619	0.025179	Q0PMD2, P01015, P02466	62	81	20099	12.0066	1	0.408101	0.396765
GOTERM_BP_DIRECT	GO:0008217~regulation of blood pressure	3	4.7619	0.026344	P01015, P02466, P07632	62	83	20099	11.7173	1	0.408101	0.396765
GOTERM_BP_DIRECT	GO:0006006~glucose metabolic process	3	4.7619	0.0269347	P23593, P55053, P21743	62	84	20099	11.5778	1	0.408101	0.396765
GOTERM_BP_DIRECT	GO:0008203~cholesterol metabolic process	3	4.7619	0.0269347	P02650, Q7TMA5, P02651	62	84	20099	11.5778	1	0.408101	0.396765
GOTERM_BP_DIRECT	GO:0061000~negative regulation of dendritic spine development	2	3.1746	0.0269908	P02650, Q64605	62	9	20099	72.0394	1	0.408101	0.396765
GOTERM_BP_DIRECT	GO:0001819~positive regulation of cytokine production	3	4.7619	0.0287386	O70534, P01015, P07632	62	87	20099	11.1785	1	0.425874	0.414044
GOTERM_BP_DIRECT	GO:0017038~protein import	2	3.1746	0.0299452	P02650, P05371	62	10	20099	64.8355	1	0.425874	0.414044
GOTERM_BP_DIRECT	GO:0045541~negative regulation of cholesterol biosynthetic process	2	3.1746	0.0299452	P02650, P07632	62	10	20099	64.8355	1	0.425874	0.414044
GOTERM_BP_DIRECT	GO:0007596~blood coagulation	3	4.7619	0.0305896	Q8K3U6, P14272, Q64268	62	90	20099	10.8059	1	0.425874	0.414044
GOTERM_BP_DIRECT	GO:0032355~response to estradiol	4	6.34921	0.0309829	Q8K3U6, P01946, Q7TMA5, P01015	62	225	20099	5.76315	1	0.425874	0.414044
GOTERM_BP_DIRECT	GO:0006089~lactate metabolic process	2	3.1746	0.0328908	P04642	62	11	20099	58.9413	1	0.437301	0.425154
GOTERM_BP_DIRECT	GO:0016042~lipid catabolic process	3	4.7619	0.0344295	P10959, Q7TMA5, P02651	62	96	20099	10.1305	1	0.437301	0.425154
GOTERM_BP_DIRECT	GO:0001525~angiogenesis	4	6.34921	0.034583	Q9QZQ5, P49134, Q9QYV0, Q62894	62	235	20099	5.51791	1	0.437301	0.425154
GOTERM_BP_DIRECT	GO:0006508~proteolysis	6	9.52381	0.0346269	Q8K3U6, P06866, P14272, Q9EQV8, Q9QYV0, Q6IRK9	62	597	20099	3.25806	1	0.437301	0.425154
GOTERM_BP_DIRECT	GO:0043691~reverse cholesterol transport	2	3.1746	0.0358275	P02650, P02651	62	12	20099	54.0296	1	0.437301	0.425154
GOTERM_BP_DIRECT	GO:0006957~complement activation, alternative pathway	2	3.1746	0.0358275	Q62930, P55314	62	12	20099	54.0296	1	0.437301	0.425154
GOTERM_BP_DIRECT	GO:0009615~response to virus	3	4.7619	0.0364164	Q7TMA5, P17220, P05371	62	99	20099	9.82356	1	0.437301	0.425154
GOTERM_BP_DIRECT	GO:0060348~bone development	3	4.7619	0.0370883	P41123	62	100	20099	9.72532	1	0.437301	0.425154
GOTERM_BP_DIRECT	GO:0034374~low-density lipoprotein particle remodeling	2	3.1746	0.0387555	P02650, Q7TMA5	62	13	20099	49.8734	1	0.437301	0.425154
GOTERM_BP_DIRECT	GO:1905907~negative regulation of amyloid fibril formation	2	3.1746	0.0387555	P02650, P05371	62	13	20099	49.8734	1	0.437301	0.425154
GOTERM_BP_DIRECT	GO:0045639~positive regulation of myeloid cell differentiation	2	3.1746	0.0387555	P11517	62	13	20099	49.8734	1	0.437301	0.425154
GOTERM_BP_DIRECT	GO:0002262~myeloid cell homeostasis	2	3.1746	0.0387555	Q99MH3, P07632	62	13	20099	49.8734	1	0.437301	0.425154
GOTERM_BP_DIRECT	GO:0042632~cholesterol homeostasis	3	4.7619	0.0412195	P02650, Q7TMA5, P02651	62	106	20099	9.17483	1	0.450088	0.437585
GOTERM_BP_DIRECT	GO:0033700~phospholipid efflux	2	3.1746	0.0416748	P02650, P02651	62	14	20099	46.3111	1	0.450088	0.437585
GOTERM_BP_DIRECT	GO:0045646~regulation of erythrocyte differentiation	2	3.1746	0.0416748	P11517	62	14	20099	46.3111	1	0.450088	0.437585
GOTERM_BP_DIRECT	GO:0085029~extracellular matrix assembly	2	3.1746	0.0445853	Q6IUU3, P02466	62	15	20099	43.2237	1	0.474739	0.461552
GOTERM_BP_DIRECT	GO:0035634~response to stilbenoid	2	3.1746	0.0474871	P01946, P02651	62	16	20099	40.5222	1	0.48212	0.468728
GOTERM_BP_DIRECT	GO:0010744~positive regulation of macrophage derived foam cell differentiation	2	3.1746	0.0474871	Q7TMA5, P01015	62	16	20099	40.5222	1	0.48212	0.468728
GOTERM_BP_DIRECT	GO:0030194~positive regulation of blood coagulation	2	3.1746	0.0474871	Q8K3U6, P35704	62	16	20099	40.5222	1	0.48212	0.468728
GOTERM_BP_DIRECT	GO:0009791~post-embryonic development	3	4.7619	0.0484678	O70534, Q7TMA5, P35577	62	116	20099	8.3839	1	0.48212	0.468728
GOTERM_BP_DIRECT	GO:0043627~response to estrogen	3	4.7619	0.0492166	P04642, Q8K3U6	62	117	20099	8.31224	1	0.48212	0.468728
GOTERM_BP_DIRECT	GO:0045723~positive regulation of fatty acid biosynthetic process	2	3.1746	0.0503803	P01015, P02651	62	17	20099	38.1385	1	0.48212	0.468728
GOTERM_BP_DIRECT	GO:0006090~pyruvate metabolic process	2	3.1746	0.0503803	P04642	62	17	20099	38.1385	1	0.48212	0.468728
GOTERM_BP_DIRECT	GO:0015909~long-chain fatty acid transport	2	3.1746	0.0503803	P02650, P55053	62	17	20099	38.1385	1	0.48212	0.468728
GOTERM_BP_DIRECT	GO:0034375~high-density lipoprotein particle remodeling	2	3.1746	0.0532648	P02650, P02651	62	18	20099	36.0197	1	0.503352	0.48937
GOTERM_BP_DIRECT	GO:0030308~negative regulation of cell growth	3	4.7619	0.0593239	Q9QZQ5, Q9QYV0, P01015	62	130	20099	7.48102	1	0.55369	0.538309
GOTERM_BP_DIRECT	GO:1902004~positive regulation of amyloid-beta formation	2	3.1746	0.0618667	P02650, P05371	62	21	20099	30.874	1	0.563509	0.547856
GOTERM_BP_DIRECT	GO:0031214~biomineral tissue development	2	3.1746	0.0618667	Q62840, Q62894	62	21	20099	30.874	1	0.563509	0.547856
GOTERM_BP_DIRECT	GO:0046889~positive regulation of lipid biosynthetic process	2	3.1746	0.0647169	P02650, P11030	62	22	20099	29.4707	1	0.582452	0.566273
GOTERM_BP_DIRECT	GO:0006412~translation	5	7.93651	0.0670885	P05765, P41123, P62982	62	505	20099	3.20968	1	0.596693	0.580118
GOTERM_BP_DIRECT	GO:0007165~signal transduction	7	11.1111	0.0705736	Q99MH3, Q9QZQ5, Q7TMA5, Q64605, P05371, Q62840, Q62894	62	961	20099	2.36133	1	0.620391	0.603158
GOTERM_BP_DIRECT	GO:0001666~response to hypoxia	4	6.34921	0.0722451	P04642, Q8K3U6, P06866	62	318	20099	4.0777	1	0.627785	0.610346
GOTERM_BP_DIRECT	GO:0060416~response to growth hormone	2	3.1746	0.0760328	Q8K3U6, P06866	62	26	20099	24.9367	1	0.645851	0.627911
GOTERM_BP_DIRECT	GO:0048015~phosphatidylinositol-mediated signaling	2	3.1746	0.0760328	O35217, P21743	62	26	20099	24.9367	1	0.645851	0.627911
GOTERM_BP_DIRECT	GO:0032930~positive regulation of superoxide anion generation	2	3.1746	0.0788406	P01015, P07632	62	27	20099	24.0131	1	0.662261	0.643865
GOTERM_BP_DIRECT	GO:0006954~inflammatory response	4	6.34921	0.083829	P08649, Q99MH3, P14272, Q62894	62	339	20099	3.8251	1	0.686344	0.667278
GOTERM_BP_DIRECT	GO:0048844~artery morphogenesis	2	3.1746	0.0844311	P02650, Q7TMA5	62	29	20099	22.3571	1	0.686344	0.667278
GOTERM_BP_DIRECT	GO:1902430~negative regulation of amyloid-beta formation	2	3.1746	0.0844311	P02650, P05371	62	29	20099	22.3571	1	0.686344	0.667278
GOTERM_BP_DIRECT	GO:0070328~triglyceride homeostasis	2	3.1746	0.0899883	P02650, P55797	62	31	20099	20.9147	1	0.716118	0.696225
GOTERM_BP_DIRECT	GO:0031640~killing of cells of another organism	2	3.1746	0.0899883	Q62930, P55314	62	31	20099	20.9147	1	0.716118	0.696225
GOTERM_BP_DIRECT	GO:0007159~leukocyte cell-cell adhesion	2	3.1746	0.0955123	P49134, P02651	62	33	20099	19.6471	1	0.750364	0.72952
GOTERM_BP_DIRECT	GO:0001889~liver development	3	4.7619	0.0979662	P04642, P06866	62	174	20099	5.58927	1	0.750364	0.72952
GOTERM_BP_DIRECT	GO:0042742~defense response to bacterium	3	4.7619	0.0979662	Q99MH3, P06866, P20759	62	174	20099	5.58927	1	0.750364	0.72952
GOTERM_BP_DIRECT	GO:0045807~positive regulation of endocytosis	2	3.1746	0.0982619	P02650, P49134	62	34	20099	19.0693	1	0.750364	0.72952

## Sheet: Diseases or Functions Annotatio
Categories		Diseases or Functions Annotation	p-value	Molecules
Free Radical Scavenging		Modification of hydrogen peroxide	2e-08	4
Hematological System Development and Function,Inflammatory Response, Tissue Morphology		Quantity of macrophages	2.89e-07	9
Carbohydrate Metabolism		Quantity of monosaccharide	9.15e-07	10
Hematological System Development and Function,Tissue Morphology		Quantity of antigen presenting cells	3.09e-08	11
Free Radical Scavenging.Small Molecule Biochemistry		Degradation of hydrogen peroxide	3.15e-13	7
Hematological System Development and Function,Tissue Morphology		Quantity ot myeloid cells	8.79e-09	15
Organismal Injury and Abnormalities,Organismal Survival		Organismal death	3.74e-07	29
Organismal Injury and Abnormalities		Abnormal morphology of abdomen	1.38e-07	16
Free Radical Scavenging,Small Molecule Biochemistry		Catabolism of hydrogen peroxide	1.83e-11	6
Tissue Development		Formation of extracellular matrix	2.46e-09	6
Carbohydrate Metabolism		Quantity of carbohydrate	1.46e-07	13
Organismal Injury and Abnormalities		Abnormal morphology of body cavity	2.75e-07	20
Hermatological System Development and Function,Tissue Morphology		Quantity of blood cells	5.8e-07	17
Carbohydrate Metabolism,Small Molecule Biochemistry		Metabolism of hexose	1.54e-08	7
Carbohydrate Metabolism,Small Molecule Biochemistry		Metabolism of D-glucose	1.4e-07	6
Hematological System Development and Function		Hemostasis	6.6e-07	8
Connective Tissue Disorders,Hematological Disease,Organismal Injury and Abnormalities		Poikilocytosis	5.34e-07	4
Free Radical Scavenging,Small Molecule Biochemistry		Metabolism of hydrogen peroxide	2.72e-09	8
Cellular Movement,Hematological System Development and Function,Immune Cell Trafficking		Cell movement of leukocytes	1.22e-07	16
Cellular Movement,lmmune Cell Trafficking		Leukocyte migration	1.28e-08	18
Organismal Injury and Abnormalities		Size of lesion	1.42e-07	12
Cellular Movement		Cell movement of myeloid cells	3.85e-07	13
Cellular Development,Cellular Growth and Proliferation,Organ Development,Skeletal and Muscular		Proliferation of smooth muscle cells	3.07e-07	9
Lipid Metabolism,Molecular Transport,Small Molecule Biochemistry		Concentration of sterol	5.52e-07	10
Cellular Development,Cellular Growth and Proliferation,Organ Development,Skeletal and Muscular .		Proliferation of muscle cells	1.33e-07	11
Organismal Survival		Survival of organism	2.8e-07	16
Lipid Metabolism,Molecular Transport,Small Molecule Biochemistry		Concentration of fatty acid	2.93e-08	11
inid Matabolism Molecular Transood smallMolocule Biocbemistrs		Concentration of linid	6.29e-09	18
Cardiovascular Disease,Organismal Injury and Abnormalities		Abnormality of heart ventricle	2.24e-09	15
Metabolic Disease,Organismal Injury and Abnormalities		Glucose metabolism disorder	2.46e-11	33
Cellular Movement,Hematological System Development and Function,lmmune Cell Trafficking,Infla..		Cell movement of neutrophils	3.27e-07	10
Cardiovascular Disease,Neurological Disease,Organismal Injury and Abnormalities,Skeletal and Mus.		Cardiomyopathy	2.63e-07	19
Tissue Morphology		Quantity of cells	4.57e-07	23
Lipid Metabolism,Molecular Transport,Small Molecule Biochemistry		Concentration of triacylglycerol	8.79e-08	11
Cellular Function and Maintenance,Protein Degradation,Protein Synthesis		Catabolism of protein	4.32e-07	13
Cellular Movement,Hematological System Development and Function,Immune Cell Trafficking, Infla..		Cell moverment of phagocytes	4.32e-07	13
Hematological System Development and Function,Nervous System Development and Function,Tiss...		Quantity of microglia	1.32e-07	5
Ophthalmic Disease,Organismal Injury and Abnormalities		Disease of retina	9.19e-07	14
Carbohydrate Metabolism		Metabolism of carbohydrate	9.8e-09	15
Free Radical Scavenging		Metabolism of reactive oxygen species	2.04e-08	14
Cardiovascular System Development and Function,Organismal Development		Angiogenesis	2.65e-07	17
Free Radical Scavenging		Synthesis of reactive oxygen species	7.7e-07	12

## Sheet: Functional Annotation for NB
Category	Term	Count	%	PValue	Genes	List Total	Pop Hits	Pop Total	Fold Enrichment	Bonferroni	Benjamini	FDR
GOTERM_BP_DIRECT	GO:0006958~complement activation, classical pathway	23	3.18119	1.8794e-23	Q62930, P31722, P55314, P08649, P31721, Q63515, Q63514, Q9WUW3, P48199, Q811M5, Q6IE64, P31720, P19999, Q9JJS8, P20759, P20760, P08650, Q6P734, P08661, P01026, Q6P6T1, P20761, P20762	710	36	20099	18.086	6.95565e-20	6.95565e-20	6.49895e-20
GOTERM_BP_DIRECT	GO:0009410~response to xenobiotic stimulus	72	9.95851	3.67524e-21	P23593, Q08163, Q9R0T4, P04638, P35577, P04639, P04916, Q99372, P30121, P33436, P11762, P70623, P39069, P07150, P07151, P61589, P04041, P02764, P04762, P07632, P28576, P04642, P55159, P06866, P49134, P14925, Q9EQV9, P31044, P14841, P17559, P13596, P17246, O88767, P47820, P01346, P82995, P01026, P63018, P47942, P06759, P62738, P58751, P15429, P04937, P16636, P19356, P70645, Q06000, P63102, P15473,…	710	560	20099	3.63966	1.36021e-17	6.80104e-18	6.3545e-18
GOTERM_BP_DIRECT	GO:0007596~blood coagulation	30	4.14938	1.73269e-20	P08934, P08932, Q6L711, P31394, Q63198, Q01177, Q64268, O08770, P14480, Q6P734, P23562, Q8K3U6, Q63207, Q62975, P18292, Q5M8C6, Q62935, P35444, P12346, P53813, O08619, P14668, Q9EQV9, Q99PS8, P14272, P16296, D3ZTE0, Q02445, P01048, P06399	710	90	20099	9.43615	6.4127e-17	2.13757e-17	1.99722e-17
GOTERM_BP_DIRECT	GO:0006412~translation	66	9.12863	8.49861e-20	P49242, P05765, P62914, P62859, P81795, P20280, P50878, P62083, P63245, P62278, P62630, P17078, P62271, Q71TY3, P84100, P62250, P17074, P09895, P05197, P83732, P63324, P62752, P62632, P62832, P62755, P04644, P62909, P24051, Q63507, Q925G0, P35427, P12001, P62243, P41123, P62982, P38983, P61354, P62282, P63174, P23358, P62703, P21533, P27952	710	505	20099	3.69972	3.14534e-16	7.86334e-17	7.34705e-17
GOTERM_BP_DIRECT	GO:0051384~response to glucocorticoid	32	4.426	3.46725e-17	P06238, P04638, P04937, P16975, P18424, P70623, P54316, P07150, P61589, P22355, P07154, P30904, P08025, P22057, P00884, P01179, P31721, P06866, P14925, Q9EQV8, P12843, P17559, P35248, P13221, P16310, P08494, P63159, P01026, P06214	710	134	20099	6.76023	1.28323e-13	2.56646e-14	2.39795e-14
GOTERM_BP_DIRECT	GO:0032355~response to estradiol	40	5.5325	1.13224e-16	Q4V7C7, P48199, P32362, P19356, P39069, P23928, Q6P6V0, P17475, P07150, P30904, P04041, P08025, P05197, P01015, P01179, P23785, P04762, Q8K3U6, P28576, P14925, P12346, P31000, P04906, P12843, P14841, P17246, P16310, P47727, Q7TMA5, P01946, Q02445, Q9R1E9, P01346, P01026, P06399, P04276, P02454, P63018	710	225	20099	5.03261	4.10894e-13	6.98401e-14	6.52545e-14
GOTERM_BP_DIRECT	GO:0061621~canonical glycolysis	15	2.07469	3.70598e-16	P04764, P04797, P47858, P30835, P16617, P15429, P48500, P16290, P11980, P25113	710	21	20099	20.2203	1.23268e-12	1.95941e-13	1.83076e-13
GOTERM_BP_DIRECT	GO:0006953~acute-phase response	19	2.62794	8.8458e-16	P08934, P06238, P08932, P06866, P18292, P48199, P12346, P04937, P24090, Q63313, Q99MH3, Q03626, P17475, P61980, Q99376, P02764, P01048, P06399	710	42	20099	12.8062	3.28715e-12	4.09229e-13	3.8236e-13
GOTERM_BP_DIRECT	GO:0014070~response to organic cyclic compound	47	6.50069	1.25118e-15	P48032, P01186, O70535, P58751, P32362, Q71UE8, P19356, P51886, P17475, P15473, P21744, P07150, P05370, P00787, P07154, P23764, P04041, P08025, P40307, P00884, P21743, P02764, P09117, P01179, P07897, P04642, Q8K3U6, P24594, P06866, P45592, P26051, P62828, P12346, P14942, P31044, P12843, Q00495, P14841, Q10739, P17246, P08010, Q9R1E9, P01346, P02454, P06214	710	329	20099	4.04406	4.51983e-12	5.14513e-13	4.80731e-13
GOTERM_BP_DIRECT	GO:0006508~proteolysis	63	8.71369	2.50694e-14	Q08163, Q6L711, P62959, O08628, P62083, Q01177, Q6IE64, P33436, Q68FS4, P00787, P07154, Q6P6T1, Q8K3U6, P06866, P18292, Q9WUW3, Q9EQV8, Q9EQV9, P59996, Q10739, P13676, D3ZTE0, O88767, Q02765, P47820, Q99MA2, Q8CHN8, O54975, P30349, Q9R1T3, Q10743, P58751, P31394, O70196, Q9QYV0, Q5U349, P70645, Q07009, P08661, P00762, P07338, P97571, Q9WUQ1, Q63207, P24155, Q64537, P28075, Q63088, O55096, Q5M872,…	710	597	20099	2.98732	9.28619e-11	9.27818e-12	8.66899e-12
GOTERM_BP_DIRECT	GO:0042274~ribosomal small subunit biogenesis	26	3.59613	3.48758e-14	P49242, P04644, P62859, P24051, P62083, P62243, P62278, P62982, Q71TY3, P62282, P62250, P17074, P62703, P63324, P62853, P62755	710	107	20099	6.87869	1.29021e-10	1.17341e-11	1.09637e-11
GOTERM_BP_DIRECT	GO:0042730~fibrinolysis	12	1.65975	1.17111e-13	Q07936, Q99PS8, P02680, P18292, P14272, D3ZTE0, P14480, P53813, Q9EQV9, Q6P734, Q01177, P06399	710	15	20099	22.6468	4.33493e-10	3.61191e-11	3.37476e-11
GOTERM_BP_DIRECT	GO:0001666~response to hypoxia	43	5.94744	1.67793e-13	P26342, P29534, P48199, P11980, P19356, P33436, Q08420, Q9QZ76, P23928, P17475, P15473, O08775, Q07009, P61589, P22355, P08025, P09117, P04762, P04642, Q8K3U6, P28576, P09812, P12928, P06866, P29089, P14925, P11598, P12346, P52944, Q00495, P14841, Q10739, P10760, P17246, Q99376, P47820, P09320, P05065, P06214	710	318	20099	3.82787	6.2086e-10	4.77693e-11	4.46329e-11
GOTERM_BP_DIRECT	GO:0009612~response to mechanical stimulus	27	3.73444	2.47017e-13	P48032, P62738, P58751, P13941, P33436, Q07009, P00787, P61589, P30904, P08025, P01015, P01179, P60711, P07897, P05539, P12346, P12843, Q00495, P68370, Q10739, P08494, Q6P6Q2, P63259, P02454, P48679	710	126	20099	6.0661	9.14238e-10	6.53006e-11	6.10131e-11
GOTERM_BP_DIRECT	GO:0010288~response to lead ion	18	2.48963	2.33595e-12	P02793, P17475, P06866, P08592, Q3B7D0, P48199, P12346, P19356, P16975, P13596, P06214, P04762	710	54	20099	9.43615	8.6452e-09	5.76356e-10	5.38514e-10
GOTERM_BP_DIRECT	GO:0045471~response to ethanol	37	5.11757	3.22705e-12	P02650, P49242, P29534, P01186, P04797, P62738, P22062, P48199, P58751, Q5M7U6, P32362, P04916, P16975, Q63313, P50115, Q99MH3, P14141, P68035, P05370, P00787, P61589, P08025, P05197, P07632, P04762, P11598, P31044, P04906, P17246, Q68FP1, P62703, P01346, P63018, P06214, P27952	710	263	20099	3.98256	1.19434e-08	7.46458e-10	6.97447e-10
GOTERM_BP_DIRECT	GO:0006096~glycolytic process	21	2.90456	4.24955e-12	P04764, P04797, P12928, P30835, P16617, P15429, P11980, P47858, Q6P6V0, P05065, P00884, P48500, P16290, P09117, P25113	710	81	20099	7.33923	1.57278e-08	9.25153e-10	8.64409e-10
GOTERM_BP_DIRECT	GO:0006094~gluconeogenesis	17	2.35131	7.82484e-12	P04764, P04797, P04636, P16617, O35077, P04916, P13221, Q6P6V0, P00884, P48500, P16290, P09117, P25113	710	50	20099	9.62487	2.89598e-08	1.60887e-09	1.50324e-09
GOTERM_BP_DIRECT	GO:0098869~cellular oxidant detoxification	20	2.76625	1.1534e-11	P02650, Q9R063, P35704, Q9Z339, P06866, P11517, P13635, P02091, P14942, P04906, P14630, P50115, P01946, P08010, Q64240, O35244, P23764, P04041, Q9Z0V6, P04762	710	76	20099	7.44959	4.26873e-08	2.2467e-09	2.09918e-09
GOTERM_BP_DIRECT	GO:0031507~heterochromatin formation	20	2.76625	2.41343e-11	P0C170, P02262, A9UMV8, P0C0S7, P0C169, Q64598, P63159, P48679, P0CC09, Q4FZT6, Q00728	710	79	20099	7.1667	8.93209e-08	4.46605e-09	4.17282e-09
GOTERM_BP_DIRECT	GO:0031100~animal organ regeneration	21	2.90456	9.74155e-11	Q8K3U6, P26342, Q62764, P06866, O70535, P04638, P04639, P24090, P04906, P11980, P19356, P13596, P17246, O35567, Q9QUH3, P47820, P02764, P09117, P02773, P26644	710	95	20099	6.25766	3.60535e-07	1.70383e-08	1.59196e-08
GOTERM_BP_DIRECT	GO:0042744~hydrogen peroxide catabolic process	13	1.79806	1.01281e-10	Q9R063, P35704, P01946, P11517, Q63716, O35244, P23764, P04041, P02091, Q9Z0V6, P02651, P04762	710	29	20099	12.69	3.74842e-07	1.70383e-08	1.59196e-08
GOTERM_BP_DIRECT	GO:0032496~response to lipopolysaccharide	37	5.11757	1.22846e-10	P29534, P97840, P16975, Q63313, P50115, Q80WY6, P17475, P15473, P22355, P30904, P04041, P08025, P02764, P06882, P35704, P55159, P06866, P12346, P53813, P35427, Q00495, P17559, P47727, Q7TMA5, Q02445, P47820, P05065, Q9Z0V6, P63159, P22985, P06214, P09006, Q6RUV5	710	298	20099	3.51481	4.54654e-07	1.97676e-08	1.84697e-08
GOTERM_BP_DIRECT	GO:0000028~ribosomal small subunit assembly	14	1.93638	1.28324e-10	P38983, P62859, Q71TY3, P24051, P17074, P63326, P62853, P27952, P62755	710	36	20099	11.0088	4.74926e-07	1.97886e-08	1.84893e-08
GOTERM_BP_DIRECT	GO:0030195~negative regulation of blood coagulation	10	1.38313	1.37468e-10	P02650, P08934, P06765, P08932, P18292, Q02445, P31394, P14668, P01048, P26644	710	14	20099	20.2203	5.0877e-07	2.03508e-08	1.90146e-08
GOTERM_BP_DIRECT	GO:0051603~proteolysis involved in protein catabolic process	17	2.35131	6.28659e-10	P60901, P28077, Q9R1T3, P28073, P34067, Q63088, Q01177, P18421, P17220, Q07009, P34064, Q02765, P07154, P00787, P06761, Q9QZE3, Q4KM35	710	65	20099	7.40375	2.32667e-06	8.94872e-08	8.36117e-08
GOTERM_BP_DIRECT	GO:0098761~cellular response to interleukin-7	11	1.52144	6.95107e-10	P04785, P04764, O35567, P11598, P63159, O35814, P10719, P62961, Q4KMA2	710	21	20099	14.8282	2.57259e-06	9.52812e-08	8.90252e-08
GOTERM_BP_DIRECT	GO:0070374~positive regulation of ERK1 and ERK2 cascade	31	4.28769	1.05155e-09	P02650, P62738, P97840, P07808, P97546, Q9QW30, O08775, P68035, P14480, P30904, P08025, Q02759, Q91ZT1, P28576, P02680, Q62812, P26051, P80254, Q00495, P14423, P17246, P08592, Q9R1E9, P63159, P01026, P06399	710	234	20099	3.75026	3.8918e-06	1.38993e-07	1.29867e-07
GOTERM_BP_DIRECT	GO:0006979~response to oxidative stress	26	3.59613	1.32075e-09	P02650, Q99J86, Q9R1T1, Q63716, P33436, Q08420, P48508, P14141, O35244, P05370, P23764, P04041, P07632, P04762, P35704, Q9R063, P28075, P31044, Q10739, P13852, P13596, Q9WUC4, P08592, O88767, Q9Z0V6, P06214	710	169	20099	4.35515	4.88807e-06	1.68555e-07	1.57488e-07
GOTERM_BP_DIRECT	GO:0042542~response to hydrogen peroxide	18	2.48963	2.61232e-09	P04642, P06866, P02091, P33436, Q9QZ76, P23928, P01946, Q07009, O88767, P04041, P05197, Q9Z0V6, P23562, P22985, P02454, P07632, P04762	710	81	20099	6.29077	9.66815e-06	3.22273e-07	3.01113e-07
GOTERM_BP_DIRECT	GO:0021762~substantia nigra development	14	1.93638	3.02373e-09	P04642, P0DP30, P0DP31, P15429, Q00981, P62260, P68511, P68255, P05370, P61589, P0DP29, P06761, P60711, P07335	710	45	20099	8.80707	1.11908e-05	3.60994e-07	3.37292e-07
GOTERM_BP_DIRECT	GO:0070527~platelet aggregation	15	2.07469	3.57011e-09	P02680, Q5M8C6, Q62812, P35444, P02091, P11598, P10111, Q6MG61, P42930, P85972, P14480, P47875, P06399, P63259, P60711	710	54	20099	7.86346	1.32129e-05	4.12906e-07	3.85795e-07
GOTERM_BP_DIRECT	GO:0006364~rRNA processing	22	3.04288	7.3301e-09	P04644, P05426, P62859, P62914, P24051, Q63507, P62083, P61354, Q71TY3, P62250, P17074, P09895, Q6AYD3, P62853, P62755	710	132	20099	4.71808	2.71284e-05	8.22082e-07	7.68106e-07
GOTERM_BP_DIRECT	GO:0001503~ossification	24	3.3195	8.25631e-09	O70534, P62804, P05539, Q8R2H5, P35444, P04937, P24090, Q10739, P16975, P20909, Q62894, P63174, P08494, Q9R1E9, O88201, P01346, P08721, Q02759, P02454, P07897	710	158	20099	4.30002	3.05561e-05	8.98724e-07	8.39715e-07
GOTERM_BP_DIRECT	GO:0140242~translation at postsynapse	7	0.968188	1.28179e-08	P19945, P62278, P62914, Q71TY3, P24051, P05197, P12001	710	7	20099	28.3085	4.7438e-05	1.34681e-06	1.25838e-06
GOTERM_BP_DIRECT	GO:0014823~response to activity	21	2.90456	1.31005e-08	P45592, P25095, P49134, P04937, P31044, P11232, P33436, P13596, P39069, Q07936, P48508, P61980, P08025, P23562, P01179, P63018, P06214, P04762	710	124	20099	4.79417	4.84839e-05	1.34681e-06	1.25838e-06
GOTERM_BP_DIRECT	GO:0071347~cellular response to interleukin-1	19	2.62794	1.63402e-08	P02650, P35859, P02680, P45592, P28077, Q4V7C7, P97710, P04937, P33436, D4AE41, P84586, Q02445, P14480, Q4V898, P63159, P22985, P09006	710	102	20099	5.27314	6.04733e-05	1.63446e-06	1.52715e-06
GOTERM_BP_DIRECT	GO:0006936~muscle contraction	14	1.93638	2.09423e-08	P04466, Q64119, P62738, Q62658, P09495, P09739, P68035, P12847, P58775, P02600, P04692, Q63610	710	52	20099	7.62151	7.75045e-05	2.03967e-06	1.90575e-06
GOTERM_BP_DIRECT	GO:0007584~response to nutrient	23	3.18119	2.46898e-08	P04642, P07338, P06238, P29534, P02770, P12928, P29089, P06759, P13635, P04639, P12843, P11980, P10760, P12785, P48508, P08494, Q99376, P08025, P00762, P02454, P06214	710	154	20099	4.22789	9.13729e-05	2.343e-06	2.18917e-06
GOTERM_BP_DIRECT	GO:0010043~response to zinc ion	14	1.93638	3.42453e-08	P02650, P29534, P30349, P14925, P14942, P31000, P19356, P50115, P63255, Q99MH3, P08010, P00884, P27139, P06214	710	54	20099	7.33923	0.000126734	3.16855e-06	2.96051e-06
GOTERM_BP_DIRECT	GO:0042157~lipoprotein metabolic process	11	1.52144	4.43829e-08	P02650, P06759, Q7TMA5, Q9QUH3, P04638, P19939, P04639, P59996, P14630, P18424, P02651	710	30	20099	10.3798	0.000164248	4.00637e-06	3.74332e-06
GOTERM_BP_DIRECT	GO:1905920~positive regulation of CoA-transferase activity	7	0.968188	4.9735e-08	P02650, P11030, P25095, P04638, P04639, P01015, P02651	710	8	20099	24.7699	0.000184052	4.3826e-06	4.09485e-06
GOTERM_BP_DIRECT	GO:0001889~liver development	24	3.3195	5.25023e-08	P04642, P26342, P06866, P28077, Q62935, P13635, P32362, P31394, Q9ER34, Q9QW30, P53813, P59996, P11980, P19356, Q9JLJ3, Q63313, P61980, P00884, P10719, P85845, P02773	710	174	20099	3.90461	0.000194292	4.51886e-06	4.22216e-06
GOTERM_BP_DIRECT	GO:0034375~high-density lipoprotein particle remodeling	9	1.24481	7.37265e-08	P02650, P06759, P04638, P04639, P14630, P18424, P02651, Q06000, P54316	710	18	20099	14.1542	0.000272825	6.20141e-06	5.79423e-06
GOTERM_BP_DIRECT	GO:0006826~iron ion transport	13	1.79806	9.41682e-08	P02793, Q920H8, Q99376, P07151, P19132, P13635, P12346	710	49	20099	7.51041	0.000348456	7.74481e-06	7.23631e-06
GOTERM_BP_DIRECT	GO:0009749~response to glucose	19	2.62794	1.27815e-07	P04642, P09606, P12928, P30835, P04638, Q8R2H5, P14630, P70668, P17246, P07154, P00787, P61589, P22355, P04041, P63159, P07897	710	116	20099	4.63673	0.000472932	1.02836e-05	9.60837e-06
GOTERM_BP_DIRECT	GO:0006956~complement activation	10	1.38313	1.46553e-07	Q62930, P55314, P08649, Q9JJS8, Q9WUW3, Q8CHN8, P62083, Q811M5, P01026, Q6P6T1	710	26	20099	10.8879	0.000542247	1.15403e-05	1.07826e-05
GOTERM_BP_DIRECT	GO:0006879~intracellular iron ion homeostasis	16	2.213	1.5596e-07	P02793, Q99MH3, Q99376, P07151, P19132, P13635, P12346, P97603, P20059, P07632	710	82	20099	5.5236	0.000577043	1.20252e-05	1.12356e-05
GOTERM_BP_DIRECT	GO:0007160~cell-matrix adhesion	17	2.35131	1.99907e-07	B5DFC9, P29534, P02680, Q5M8C6, P49134, P97710, P04937, P13941, Q07936, O08770, P08460, P14480, P61589, Q9R1E9, Q5ZQU0, P01015, P06399	710	95	20099	5.06572	0.000739581	1.50991e-05	1.41077e-05
GOTERM_BP_DIRECT	GO:0042246~tissue regeneration	11	1.52144	2.31124e-07	P48032, P23593, Q9R172, Q8CIZ5, Q9QUH3, Q68FP1, Q9QW30, Q9QYV0, Q01177, P21743, Q6IRK9	710	35	20099	8.89694	0.000855025	1.71078e-05	1.59845e-05
GOTERM_BP_DIRECT	GO:0097421~liver regeneration	16	2.213	2.99072e-07	Q62975, P05426, Q62935, Q9EQV9, P12001, P17246, Q99MH3, P41123, P84100, P14272, P62250, P62890, P06399, P02773	710	86	20099	5.26669	0.00110625	2.17033e-05	2.02783e-05
GOTERM_BP_DIRECT	GO:0009615~response to virus	17	2.35131	3.5919e-07	P42930, P04764, P62738, P45592, P17220, Q7TMA5, P68035, P13668, P05371, Q68FR6, P63029	710	99	20099	4.86105	0.00132848	2.55646e-05	2.38861e-05
GOTERM_BP_DIRECT	GO:0050766~positive regulation of phagocytosis	14	1.93638	4.27914e-07	Q62812, P04638, P97710, P04639, P24090, P53813, P35248, P19999, P20759, P08661, P01026, P63018, P07632	710	66	20099	6.00482	0.00158246	2.98813e-05	2.79194e-05
GOTERM_BP_DIRECT	GO:0031667~response to nutrient levels	24	3.3195	4.67691e-07	Q8K3U6, Q32PX7, P48032, P35859, P55159, P26051, P49134, P48199, P35577, P11598, P04906, P19356, P14841, P12785, P08025, P47820, P09320, P01346, P23562, P04276, P02454, P06214, P24268, P07632	710	196	20099	3.46634	0.00172943	3.20542e-05	2.99496e-05
GOTERM_BP_DIRECT	GO:0007155~cell adhesion	36	4.97925	1.03774e-06	Q63678, P35859, P29534, Q64604, O70513, P97586, P58751, P04937, Q63198, Q62840, Q9WVH8, P85972, P61589, P08721, Q9Z1Y3, P07897, P03994, Q9EPF2, Q62812, P26051, P49134, P30836, Q62935, Q99PP0, P35444, Q3SWT0, P13596, P35446, Q07936, P08592, Q9QZQ5, O35112, P49744, Q9R1E9, Q6RUV5	710	404	20099	2.52254	0.0038333	6.98302e-05	6.52453e-05
GOTERM_BP_DIRECT	GO:0140236~translation at presynapse	6	0.829876	1.06642e-06	P19945, P62278, P62914, Q71TY3, P24051, P12001	710	7	20099	24.2644	0.00393906	7.04791e-05	6.58516e-05
GOTERM_BP_DIRECT	GO:0007015~actin filament organization	21	2.90456	1.41543e-06	Q08163, P30009, P45592, P62738, Q5XFX0, Q91ZN1, P97710, P12346, P58775, Q63610, P63312, P09495, P68035, Q68FP1, P61589, P62329, P04692, P85845, Q6RUV5	710	164	20099	3.62486	0.0052248	9.19034e-05	8.58693e-05
GOTERM_BP_DIRECT	GO:0001867~complement activation, lectin pathway	7	0.968188	1.45344e-06	P19999, Q9JJS8, Q6IMF3, Q8CHN8, P62083, P08661, Q9WTS8	710	12	20099	16.5133	0.00536474	9.27444e-05	8.6655e-05
GOTERM_BP_DIRECT	GO:0030036~actin cytoskeleton organization	25	3.45781	1.77144e-06	P28576, Q08163, Q62812, P62828, Q91ZN1, Q9R0T4, Q5M7U6, Q0PMD2, P52944, Q5RKI0, D3ZHA0, P63312, P07150, Q68FP1, P61589, Q9EPC6, B2GUZ5, P63159, P85845, P62963, Q6RUV5	710	227	20099	3.11767	0.00653467	0.00011112	0.000103824
GOTERM_BP_DIRECT	GO:0031639~plasminogen activation	7	0.968188	2.61859e-06	P02680, P14272, P14480, P16617, P06399, P26644	710	13	20099	15.243	0.0096446	0.000161523	0.000150918
GOTERM_BP_DIRECT	GO:0045087~innate immune response	36	4.97925	2.97459e-06	Q63515, Q63514, P48199, P07808, Q9QYV0, Q811M5, Q6IE64, Q63313, P50115, P07150, P07151, P14480, P30904, Q6P734, P08661, Q6P6T1, Q62930, P31722, P23680, P08649, P31721, P01174, Q9WUW3, Q00495, P31720, P35248, Q9JJS8, P08592, Q8CHN8, P63159, P01026, Q8CHN3, P06399	710	423	20099	2.40923	0.0109486	0.000180475	0.000168625
GOTERM_BP_DIRECT	GO:0009725~response to hormone	17	2.35131	3.16457e-06	Q8K3U6, P48032, P58751, P30121, P16636, P13697, Q10739, P19356, Q9QZ76, P16310, P07150, P08494, Q9QUH3, P30904, P04041, P06214	710	116	20099	4.14865	0.0116438	0.000188905	0.000176501
GOTERM_BP_DIRECT	GO:0043627~response to estrogen	17	2.35131	3.54795e-06	P04642, Q8K3U6, P48032, P29089, P25095, Q8CIZ5, P04638, P04639, P12843, Q10739, P33436, P05065, P82995, P01026, P27139	710	117	20099	4.11319	0.0130451	0.000208428	0.000194743
GOTERM_BP_DIRECT	GO:0050821~protein stabilization	24	3.3195	3.78663e-06	P04797, P62914, P04638, P34058, P28480, P04639, P62083, Q5U349, P36953, P23928, O88767, P05371, P09895, P08025, Q6P502, Q9EPC6, P82995, P62963, P62832, P24368, P23785, P83868	710	221	20099	3.07422	0.0139166	0.000218974	0.000204597
GOTERM_BP_DIRECT	GO:0030324~lung development	20	2.76625	3.84694e-06	P13635, P13941, P04916, P16636, Q10739, P16975, P17246, Q07936, P63102, O08775, P61980, P08494, P08025, P47820, Q9R1E9, P63159, Q6AYH9	710	160	20099	3.53856	0.0141367	0.000219039	0.000204657
GOTERM_BP_DIRECT	GO:0006954~inflammatory response	31	4.28769	4.0028e-06	P08934, Q99J86, P29534, P08932, P25095, P97840, Q80WY6, Q99MH3, P07150, P30904, P06765, P08649, P50463, P29089, P26051, Q62935, P14423, Q6IE51, P12785, Q63621, Q62894, P17246, P14272, O88767, P08650, P01048, P63159, P01026	710	339	20099	2.58868	0.0147052	0.00022446	0.000209723
GOTERM_BP_DIRECT	GO:0033700~phospholipid efflux	7	0.968188	4.4457e-06	P02650, P06759, Q9QUH3, P04638, P19939, P04639, P02651	710	14	20099	14.1542	0.0163189	0.000245575	0.000229451
GOTERM_BP_DIRECT	GO:0018149~peptide cross-linking	8	1.1065	4.97921e-06	Q6IFW6, P07150, Q6IMF3, Q6IG02, P04937, P13941, P01039, O08619	710	21	20099	10.7842	0.0182593	0.000271001	0.000253207
GOTERM_BP_DIRECT	GO:0043410~positive regulation of MAPK cascade	24	3.3195	5.52507e-06	P08934, P28576, P08932, P35704, P10960, P30121, P10111, P17246, P15473, P21744, O08775, Q00657, P08592, P35572, P08025, P01346, P01048, P63159, Q9Z1Y3, P01015, Q91ZT1, P07632	710	226	20099	3.00621	0.0202407	0.000290368	0.000271303
GOTERM_BP_DIRECT	GO:0030163~protein catabolic process	18	2.48963	5.57042e-06	P07338, P97571, Q64537, P31394, O70196, Q9EQV8, Q9EQV9, O55096, Q10739, P33436, Q99MH3, Q00981, Q64240, Q07009, P07154, P00787, P24268	710	135	20099	3.77446	0.0204051	0.000290368	0.000271303
GOTERM_BP_DIRECT	GO:0071333~cellular response to glucose stimulus	18	2.48963	5.57042e-06	P29534, P06759, Q05982, P04937, Q9EQV9, P11232, P11762, P17246, P63245, P48508, P19804, P61980, P08025, P04041, P47820, Q9R1E9, P02454	710	135	20099	3.77446	0.0204051	0.000290368	0.000271303
GOTERM_BP_DIRECT	GO:0030388~fructose 1,6-bisphosphate metabolic process	6	0.829876	6.03111e-06	P47858, P30835, P05065, P00884, P09117	710	9	20099	18.8723	0.0220739	0.000305769	0.000285693
GOTERM_BP_DIRECT	GO:0043567~regulation of insulin-like growth factor receptor signaling pathway	6	0.829876	6.03111e-06	P24594, P15473, P21744, P35572, P12843, P21743	710	9	20099	18.8723	0.0220739	0.000305769	0.000285693
GOTERM_BP_DIRECT	GO:0051402~neuron apoptotic process	18	2.48963	6.16101e-06	P04797, P50475, P29089, P25095, Q91ZN1, P68370, P17246, P08592, P00787, O88600, P04041, P63159, P01015, P06761, P83868	710	136	20099	3.74671	0.022544	0.000308134	0.000287902
GOTERM_BP_DIRECT	GO:0008284~positive regulation of cell population proliferation	44	6.08575	6.76599e-06	P26342, P01186, O70535, P25095, Q10743, P07808, P04937, Q9QW30, P36201, P70623, O35568, O08775, P05371, P30904, P08025, P01015, Q91ZT1, P62634, P23785, P62832, P62755, P28576, P18292, Q9EST6, P18297, P35427, Q00495, P14841, Q64610, P17246, P16310, O88201, P09320, Q9R1E9, P62703, P01346, Q9Z0V6, P63159, P62961	710	592	20099	2.10401	0.0247301	0.000333879	0.000311957
GOTERM_BP_DIRECT	GO:0008203~cholesterol metabolic process	14	1.93638	7.30839e-06	P02650, P55159, P06759, Q5M8C6, P04638, P04639, P59996, P18424, P08592, Q7TMA5, Q9QUH3, P19939, P02651, P04762	710	84	20099	4.71808	0.0266859	0.000355899	0.000332532
GOTERM_BP_DIRECT	GO:0019242~methylglyoxal biosynthetic process	5	0.691563	7.46349e-06	P05065, P48500	710	5	20099	28.3085	0.0272445	0.000358732	0.000335179
GOTERM_BP_DIRECT	GO:0033344~cholesterol efflux	9	1.24481	8.84659e-06	P02650, P06759, Q7TMA5, Q9QUH3, P04638, P19939, P04639, P14630, P02651	710	31	20099	8.21858	0.0322112	0.000419759	0.000392199
GOTERM_BP_DIRECT	GO:0048870~cell motility	10	1.38313	1.02253e-05	P45592, Q7M0E3, Q62812, P97710, P63259, P85845, P60711, Q6RUV5	710	41	20099	6.9045	0.0371369	0.000479036	0.000447583
GOTERM_BP_DIRECT	GO:0005980~glycogen catabolic process	7	0.968188	1.11584e-05	P47858, P09812, P08494, P63159, P53534	710	16	20099	12.3849	0.0404564	0.000514224	0.000480461
GOTERM_BP_DIRECT	GO:0032869~cellular response to insulin stimulus	19	2.62794	1.12543e-05	Q63678, P12928, Q8R2H5, P24090, P04906, P59996, P11980, P13221, P16310, P61980, P0C0S7, P27605, P08025, P61983, P00884	710	157	20099	3.42586	0.0407968	0.000514224	0.000480461
GOTERM_BP_DIRECT	GO:0010976~positive regulation of neuron projection development	21	2.90456	1.46264e-05	P02650, Q62952, Q9WUQ1, P30009, P49134, P58751, Q05982, P97546, Q63198, P42930, Q7M767, P62630, P19804, P61980, P63159, P01015, P62632, P06761, P23785	710	191	20099	3.11245	0.0526937	0.000652248	0.000609423
GOTERM_BP_DIRECT	GO:0045861~negative regulation of proteolysis	9	1.24481	1.46276e-05	P08934, P48032, P08932, P18292, P01039, P30121, P01048, P14841	710	33	20099	7.72049	0.0526977	0.000652248	0.000609423
GOTERM_BP_DIRECT	GO:0001934~positive regulation of protein phosphorylation	25	3.45781	1.5024e-05	P18292, P58751, P97546, P35427, Q00495, Q3SWT0, P10111, P10354, P63245, Q07936, O08775, P08592, Q99376, O88797, P30904, P25304, Q9R1E9, P82995, P63159, P01026, Q91ZT1, Q6RUV5	710	257	20099	2.75374	0.0540866	0.000661951	0.000618489
GOTERM_BP_DIRECT	GO:0019430~removal of superoxide radicals	7	0.968188	1.67308e-05	Q9QZ76, P35704, O88767, Q63716, Q08420, P07632, P02651	710	17	20099	11.6564	0.0600432	0.000728481	0.00068065
GOTERM_BP_DIRECT	GO:0001649~osteoblast differentiation	16	2.213	1.74886e-05	P26342, P24594, O70534, Q99PP0, P16636, P12843, P63245, P15473, P62282, P08025, B9TQX4, P62329, P01346, P08721, P02454	710	118	20099	3.83843	0.0626755	0.000752619	0.000703203
GOTERM_BP_DIRECT	GO:0010269~response to selenium ion	8	1.1065	1.81969e-05	P19945, Q7TMA5, P23764, P04041, P31000, P11232, P06214, P25236	710	25	20099	9.0587	0.0651295	0.0007741	0.000723274
GOTERM_BP_DIRECT	GO:0071353~cellular response to interleukin-4	9	1.24481	1.85408e-05	P19945, Q91ZN1, P34058, Q5XIF6, P68370, P06761, P06214, P12785, P27952	710	34	20099	7.49341	0.0663186	0.000779765	0.000728567
GOTERM_BP_DIRECT	GO:0048545~response to steroid hormone	12	1.65975	2.06867e-05	P62738, O88797, P35577, P08025, P16636, P12843, P08721, P27139, P04276, P01179, P02454	710	67	20099	5.07017	0.0737046	0.000859065	0.000802661
GOTERM_BP_DIRECT	GO:0006457~protein folding	18	2.48963	2.08905e-05	P04785, B0BN18, P34058, P28480, P11598, P10111, P23928, Q99PF5, O88600, Q6P502, P82995, Q6IUU3, P06761, P63018, Q6PEC1, P24368, P83868	710	149	20099	3.41981	0.0744033	0.000859065	0.000802661
GOTERM_BP_DIRECT	GO:0043536~positive regulation of blood vessel endothelial cell migration	11	1.52144	2.29627e-05	P42930, P17246, O08775, P08025, P62329, P01346, P63159, Q01177, P10719	710	56	20099	5.56059	0.0814747	0.0009339	0.000872582
GOTERM_BP_DIRECT	GO:0010498~proteasomal protein catabolic process	9	1.24481	2.32963e-05	P60901, P17220, P46462, P40307, P48004, P18420, P21670, P18422	710	35	20099	7.27932	0.0826083	0.000937171	0.000875638
GOTERM_BP_DIRECT	GO:0060416~response to growth hormone	8	1.1065	2.41463e-05	Q8K3U6, P16310, P24594, P06866, P15473, P19804, P08025, P06399	710	26	20099	8.71029	0.0854898	0.000938697	0.000877064
GOTERM_BP_DIRECT	GO:0006880~intracellular sequestering of iron ion	7	0.968188	2.43488e-05	P02793, P19132	710	18	20099	11.0088	0.0861748	0.000938697	0.000877064
GOTERM_BP_DIRECT	GO:2000767~positive regulation of cytoplasmic translation	7	0.968188	2.43488e-05	Q62764, P05197, P11980, P62961, P62634, Q9EPH8	710	18	20099	11.0088	0.0861748	0.000938697	0.000877064
GOTERM_BP_DIRECT	GO:2000343~positive regulation of chemokine (C-X-C motif) ligand 2 production	7	0.968188	2.43488e-05	P17246, P30904, P63159, Q06000	710	18	20099	11.0088	0.0861748	0.000938697	0.000877064
GOTERM_BP_DIRECT	GO:0051591~response to cAMP	13	1.79806	2.57194e-05	P04642, P09812, P12928, Q05982, P22355, P00884, P31044, P01179, P16975, Q6P6T1, P02454, P20156	710	81	20099	4.54333	0.0907985	0.000981313	0.000916882
GOTERM_BP_DIRECT	GO:0010039~response to iron ion	8	1.1065	3.16101e-05	Q99MH3, Q62658, Q3B7D0, Q99376, P04937, P32362, P31720, P06214	710	27	20099	8.38769	0.110407	0.00119377	0.00111539
GOTERM_BP_DIRECT	GO:0043691~reverse cholesterol transport	6	0.829876	3.46983e-05	P02650, P04638, P04639, P14630, P18424, P02651	710	12	20099	14.1542	0.120517	0.00127872	0.00119476
GOTERM_BP_DIRECT	GO:0014012~peripheral nervous system axon regeneration	6	0.829876	3.46983e-05	P02650, P23593, P04639, P33436, P13596, P02651	710	12	20099	14.1542	0.120517	0.00127872	0.00119476
GOTERM_BP_DIRECT	GO:0007565~female pregnancy	18	2.48963	3.48962e-05	P04797, P24594, P97840, P13635, P12843, P33436, P42930, P17246, P15473, Q07009, P08025, P47820, P09320, P01346, P01015, P04276, P01179	710	155	20099	3.28743	0.12116	0.00127872	0.00119476
GOTERM_BP_DIRECT	GO:0050731~positive regulation of peptidyl-tyrosine phosphorylation	15	2.07469	3.61816e-05	P26051, P49134, P58751, Q63198, Q3SWT0, P13852, Q64610, P17246, P16310, Q00657, P08025, P49744, P30904, P25304	710	111	20099	3.82547	0.125332	0.00130008	0.00121472
GOTERM_BP_DIRECT	GO:0071346~cellular response to type II interferon	15	2.07469	3.61816e-05	P0DP30, P04797, P0DP31, Q4V7C7, P97840, Q5M7U6, P97710, P31000, P35427, Q3SWT0, Q68FP1, P0DP29, P63259, P60711, P09006	710	111	20099	3.82547	0.125332	0.00130008	0.00121472
GOTERM_BP_DIRECT	GO:0006006~glucose metabolic process	13	1.79806	3.73149e-05	P04797, P38652, P23593, P05370, P55053, P01346, P48500, P11980, P21743	710	84	20099	4.38107	0.128993	0.00132791	0.00124072
GOTERM_BP_DIRECT	GO:0048146~positive regulation of fibroblast proliferation	13	1.79806	4.20757e-05	P08934, P49242, P28576, P17246, Q07936, P08932, P08025, P30904, P04937, P01048, P01015	710	85	20099	4.32953	0.144206	0.00146977	0.00137327
GOTERM_BP_DIRECT	GO:0032760~positive regulation of tumor necrosis factor production	16	2.213	4.20957e-05	P06765, P97840, P80254, Q00495, Q63313, Q06000, P42930, P17246, P08592, P05371, P30904, P02764, P63159	710	127	20099	3.56642	0.144269	0.00146977	0.00137327
GOTERM_BP_DIRECT	GO:0071354~cellular response to interleukin-6	9	1.24481	4.40859e-05	Q99MH3, P48032, P02680, P45592, Q9WUW3, P48199, P06399, P09006	710	38	20099	6.70463	0.15055	0.00152488	0.00142476
GOTERM_BP_DIRECT	GO:0014911~positive regulation of smooth muscle cell migration	10	1.38313	4.66045e-05	Q6B345, P12346, Q99PP0, P30904, P08025, P63159, P06399	710	49	20099	5.77723	0.158431	0.00159707	0.00149221
GOTERM_BP_DIRECT	GO:0014829~vascular associated smooth muscle contraction	5	0.691563	4.93579e-05	P62738, P68035, P35444	710	7	20099	20.2203	0.166964	0.0016759	0.00156587
GOTERM_BP_DIRECT	GO:0045780~positive regulation of bone resorption	8	1.1065	5.22449e-05	O70534, Q99376, P12346, P24090, P08721, P27139	710	29	20099	7.80923	0.175818	0.00172641	0.00161306
GOTERM_BP_DIRECT	GO:0046716~muscle cell cellular homeostasis	8	1.1065	5.22449e-05	P17246, P47858, P50463, P05065, P16636, Q01177, P07632	710	29	20099	7.80923	0.175818	0.00172641	0.00161306
GOTERM_BP_DIRECT	GO:0046688~response to copper ion	8	1.1065	5.22449e-05	P14925, Q99376, P13635, P00884, P13852, Q08420, P07632, P18424	710	29	20099	7.80923	0.175818	0.00172641	0.00161306
GOTERM_BP_DIRECT	GO:0045639~positive regulation of myeloid cell differentiation	6	0.829876	5.47482e-05	P11517, P02091, P63159	710	13	20099	13.0654	0.183419	0.00179312	0.00167539
GOTERM_BP_DIRECT	GO:0006414~translational elongation	7	0.968188	6.50091e-05	P62630, Q68FR9, Q3T1J1, P05197, Q68FR6, P62632	710	21	20099	9.43615	0.213849	0.00207844	0.00194198
GOTERM_BP_DIRECT	GO:0006641~triglyceride metabolic process	9	1.24481	6.51444e-05	P02650, P11030, P06759, Q9QUH3, P19939, P04041, P59996, P04762, P26644	710	40	20099	6.3694	0.214243	0.00207844	0.00194198
GOTERM_BP_DIRECT	GO:0061077~chaperone-mediated protein folding	9	1.24481	6.51444e-05	P42930, P34058, P28480, P05371, Q6P502, O70593, P63018, P24368	710	40	20099	6.3694	0.214243	0.00207844	0.00194198
GOTERM_BP_DIRECT	GO:0035094~response to nicotine	12	1.65975	6.91619e-05	P29534, P01186, P29089, P08010, P08025, P04041, P14942, P05065, P01346, P00762, P33436	710	76	20099	4.46976	0.22584	0.00218776	0.00204412
GOTERM_BP_DIRECT	GO:0043434~response to peptide hormone	16	2.213	7.20834e-05	P07338, Q03191, Q08163, P30349, P06759, P35577, P16975, P54316, P16310, P07150, P00787, Q9R1E9, P00884, P01179, P02454, P09006	710	133	20099	3.40553	0.234166	0.00226085	0.00211241
GOTERM_BP_DIRECT	GO:0043065~positive regulation of apoptotic process	32	4.426	7.68386e-05	P05545, Q64604, Q10743, Q9QW30, Q811M5, P33436, P11762, P63245, P62630, P15473, P07150, P05371, P62632, P62755, Q4FZU4, P04642, P07338, P49134, Q8R2H5, Q3T1J1, P14668, P17246, Q99PS8, P08592, P47820, Q9R1E9, P63159, P24268	710	415	20099	2.18282	0.247527	0.00238974	0.00223284
GOTERM_BP_DIRECT	GO:0044794~positive regulation by host of viral process	6	0.829876	8.2694e-05	P02650, Q07936, P45592, Q00495, P24368	710	14	20099	12.1322	0.26366	0.00253172	0.00236549
GOTERM_BP_DIRECT	GO:0034097~response to cytokine	14	1.93638	8.27717e-05	P07338, P48032, O70535, P30836, Q91ZN1, P13941, P30121, P17559, P16975, P33436, P16310, P17475, P00787, P09006	710	105	20099	3.77446	0.263872	0.00253172	0.00236549
GOTERM_BP_DIRECT	GO:0097066~response to thyroid hormone	7	0.968188	8.67321e-05	P07943, Q8K3U6, Q07936, P08025, P47820, P14668, P06399	710	22	20099	9.00723	0.274584	0.00263111	0.00245836
GOTERM_BP_DIRECT	GO:0030168~platelet activation	9	1.24481	9.39518e-05	P06765, Q99PS8, P02680, P18292, O08770, Q62935, P14480, P06399, P10111	710	42	20099	6.0661	0.293712	0.00282696	0.00264134
GOTERM_BP_DIRECT	GO:0001525~angiogenesis	22	3.04288	9.52339e-05	P28576, P09606, Q9EPF2, Q62812, P49134, P04937, Q9QYV0, Q10739, Q3SWT0, P33436, Q9ET61, Q62894, P15684, Q07936, P63102, O08775, Q00657, Q9QZQ5, Q9R1E9, P10719, P63259, Q91ZT1, P60711	710	235	20099	2.65015	0.297056	0.00284103	0.0026545
GOTERM_BP_DIRECT	GO:0060316~positive regulation of ryanodine-sensitive calcium-release channel activity	5	0.691563	9.59549e-05	P0DP30, P0DP31, Q9Z339, P08010, P14942, P0DP29	710	8	20099	17.6928	0.298929	0.00284103	0.0026545
GOTERM_BP_DIRECT	GO:0042104~positive regulation of activated T cell proliferation	8	1.1065	0.000102756	P62909, P08025, P01346, P12843, P63159	710	32	20099	7.07711	0.316356	0.00301825	0.00282008
GOTERM_BP_DIRECT	GO:0070301~cellular response to hydrogen peroxide	15	2.07469	0.000112633	P42930, P97571, P62909, P45592, P07150, O88767, P97710, P30904, P12346, P14841, P63018	710	123	20099	3.45225	0.340898	0.00328232	0.00306681
GOTERM_BP_DIRECT	GO:0006749~glutathione metabolic process	10	1.38313	0.000119454	Q9Z339, P48508, P08010, P05370, Q6P7Q4, P04041, P02091, P14942, P04906, P07632	710	55	20099	5.14699	0.35733	0.00345389	0.00322712
GOTERM_BP_DIRECT	GO:1900242~regulation of synaptic vesicle endocytosis	8	1.1065	0.000126483	P0DP30, P0DP31, O88767, P0DP29, P63259, P60711, Q6RUV5	710	33	20099	6.86265	0.373835	0.00362878	0.00339052
GOTERM_BP_DIRECT	GO:0043066~negative regulation of apoptotic process	41	5.67082	0.000127509	P07943, P49242, P01186, Q62764, P62738, P31394, P04937, P23928, Q6P6V0, P19804, P61980, P68035, P05371, O88797, P30904, P08025, P06761, Q91ZT1, P07632, P62755, P04762, Q62632, Q9R063, Q9EST6, P26051, P49134, P34058, Q3T1J1, P35444, Q00495, P13852, P42930, Q9WUC4, Q99376, O88600, Q6P7Q4, Q9Z0V6, Q6AYD3, P62961	710	608	20099	1.90896	0.376209	0.00363008	0.00339174
GOTERM_BP_DIRECT	GO:0010001~glial cell differentiation	8	1.1065	0.000154468	P03994, P58751, P08025, Q9QW30, Q9Z1Y3, P68370, Q6P6T1, P07897	710	34	20099	6.66081	0.435451	0.00433094	0.00404658
GOTERM_BP_DIRECT	GO:0030574~collagen catabolic process	8	1.1065	0.000154468	Q4TU93, Q02765, P00787, P07154, Q9QYV0, Q5I0D7, Q10739, P33436	710	34	20099	6.66081	0.435451	0.00433094	0.00404658
GOTERM_BP_DIRECT	GO:0021987~cerebral cortex development	15	2.07469	0.000158865	A9UMV8, Q64605, P58751, P07808, P24090, P13941, P68370, O35567, P62260, P61980, Q3KRE8, Q9Z1Y3, P85108	710	127	20099	3.34352	0.444567	0.00442075	0.0041305
GOTERM_BP_DIRECT	GO:0060315~negative regulation of ryanodine-sensitive calcium-release channel activity	5	0.691563	0.000167894	P0DP30, P0DP31, Q9Z339, P08010, P14942, P0DP29	710	9	20099	15.7269	0.462823	0.00456608	0.00426628
GOTERM_BP_DIRECT	GO:1905913~negative regulation of calcium ion export across plasma membrane	4	0.55325	0.000170257	P0DP30, P0DP31, P62260, P0DP29	710	4	20099	28.3085	0.4675	0.00456608	0.00426628
GOTERM_BP_DIRECT	GO:0002542~Factor XII activation	4	0.55325	0.000170257	P08934, P08932, D3ZTE0, P01048	710	4	20099	28.3085	0.4675	0.00456608	0.00426628
GOTERM_BP_DIRECT	GO:0061874~positive regulation of hepatic stellate cell contraction	4	0.55325	0.000170257	P62738, P68035	710	4	20099	28.3085	0.4675	0.00456608	0.00426628
GOTERM_BP_DIRECT	GO:0060265~positive regulation of respiratory burst involved in inflammatory response	4	0.55325	0.000170257	P17074, Q63313	710	4	20099	28.3085	0.4675	0.00456608	0.00426628
GOTERM_BP_DIRECT	GO:0043129~surfactant homeostasis	7	0.968188	0.000188082	P19999, P17246, O08775, Q9WVT0, P22355, P08661, P35248	710	25	20099	7.92637	0.501502	0.00497208	0.00464562
GOTERM_BP_DIRECT	GO:0000302~response to reactive oxygen species	7	0.968188	0.000188082	P23593, O35244, Q63716, P04041, P04906, P07632, P04762	710	25	20099	7.92637	0.501502	0.00497208	0.00464562
GOTERM_BP_DIRECT	GO:0019731~antibacterial humoral response	10	1.38313	0.000208235	P01174, P08592, O55004, P20759, P12346, P20760, Q8CHN3, P20761, P20762	710	59	20099	4.79804	0.537337	0.00546579	0.00510692
GOTERM_BP_DIRECT	GO:0032868~response to insulin	16	2.213	0.000222728	P02650, P15473, P30904, P04916, P63159, P11980, P06399, P21743, P02454, P20156, P62755, P04762	710	147	20099	3.08119	0.561506	0.00580504	0.0054239
GOTERM_BP_DIRECT	GO:0006090~pyruvate metabolic process	6	0.829876	0.000234037	P04642, P42123, P13697, P11980	710	17	20099	9.99122	0.579484	0.00601508	0.00562014
GOTERM_BP_DIRECT	GO:0098885~modification of postsynaptic actin cytoskeleton	6	0.829876	0.000234037	Q08163, P45592, Q9EPC6, P62963	710	17	20099	9.99122	0.579484	0.00601508	0.00562014
GOTERM_BP_DIRECT	GO:0043200~response to amino acid	10	1.38313	0.000237425	P48032, P45592, P61589, P58751, Q9R1E9, P00884, P04906, P19356, P06214	710	60	20099	4.71808	0.584725	0.00606006	0.00566217
GOTERM_BP_DIRECT	GO:0030335~positive regulation of cell migration	24	3.3195	0.000268795	P28576, Q9EPF2, P49134, Q10743, P04937, Q10739, Q00495, Q3SWT0, P33436, P17246, P63245, O08775, P61589, O88797, P08025, P63159, P63259, P06761, Q91ZT1, P60711, P02454, P63018, P23785	710	290	20099	2.34277	0.630256	0.00671154	0.00627087
GOTERM_BP_DIRECT	GO:0048821~erythrocyte development	8	1.1065	0.000269681	P01946, P11517, P05370, Q9WVT0, P02091, P23562, P62755	710	37	20099	6.12075	0.631466	0.00671154	0.00627087
GOTERM_BP_DIRECT	GO:0061844~antimicrobial humoral immune response mediated by antimicrobial peptide	14	1.93638	0.000271464	P04797, P06765, Q99MH3, Q99PS8, P18292, P08592, Q8CIZ5, P62890, P07151, P17074, P07808	710	118	20099	3.35863	0.633891	0.00671154	0.00627087
GOTERM_BP_DIRECT	GO:0071560~cellular response to transforming growth factor beta stimulus	14	1.93638	0.000271464	P28576, P17246, P62738, Q4V7C7, P68035, O88797, P11598, P04937, Q99372, Q00495, Q3SWT0, P02454	710	118	20099	3.35863	0.633891	0.00671154	0.00627087
GOTERM_BP_DIRECT	GO:0071284~cellular response to lead ion	5	0.691563	0.000272016	P61980, P14668, P19356, P06214	710	10	20099	14.1542	0.634638	0.00671154	0.00627087
GOTERM_BP_DIRECT	GO:0048260~positive regulation of receptor-mediated endocytosis	7	0.968188	0.00029602	P61980, P07151, P05371, P12346, P01026	710	27	20099	7.33923	0.665706	0.0072077	0.00673446
GOTERM_BP_DIRECT	GO:0032930~positive regulation of superoxide anion generation	7	0.968188	0.00029602	P17246, P08592, P25095, P48199, P04906, P01015, P07632	710	27	20099	7.33923	0.665706	0.0072077	0.00673446
GOTERM_BP_DIRECT	GO:0002181~cytoplasmic translation	15	2.07469	0.00030209	P05765, P19945, P38983, P62859, P62914, P84100, P63174, P62890, P83732, P12001, P21533, P62755	710	135	20099	3.14538	0.673134	0.00730743	0.00682764
GOTERM_BP_DIRECT	GO:0010628~positive regulation of gene expression	40	5.5325	0.000333525	P26342, P01186, P62914, P62738, P97840, P48199, P04937, P62083, Q63198, O35763, P68035, P05371, P09895, P08025, P01015, P60711, P62832, Q32PX7, P06765, P62909, P26051, P12346, P31000, Q00495, P17246, P08592, Q7TMA5, Q99376, O88767, Q68FP1, Q9R1E9, P63259, P47967, P63018, P48679, P83868	710	616	20099	1.83821	0.709043	0.00801542	0.00748915
GOTERM_BP_DIRECT	GO:0050804~modulation of chemical synaptic transmission	16	2.213	0.000344391	P45592, Q64605, P49134, P58751, P97546, P13596, P62198, P61980, Q3KRE8, Q9EPC6, Q9Z1Y3, P85108, P62963, P20156	710	153	20099	2.96036	0.720517	0.00822318	0.00768326
GOTERM_BP_DIRECT	GO:0034014~response to triglyceride	4	0.55325	0.000414446	P17475, P06759, P02651, P26644	710	5	20099	22.6468	0.784368	0.00947509	0.00885297
GOTERM_BP_DIRECT	GO:0090131~mesenchyme migration	4	0.55325	0.000414446	P62738, P68035	710	5	20099	22.6468	0.784368	0.00947509	0.00885297
GOTERM_BP_DIRECT	GO:0018158~protein oxidation	4	0.55325	0.000414446	P04638, P04639, P04041, P16636	710	5	20099	22.6468	0.784368	0.00947509	0.00885297
GOTERM_BP_DIRECT	GO:0061870~positive regulation of hepatic stellate cell migration	4	0.55325	0.000414446	P62738, P68035	710	5	20099	22.6468	0.784368	0.00947509	0.00885297
GOTERM_BP_DIRECT	GO:0034372~very-low-density lipoprotein particle remodeling	4	0.55325	0.000414446	P02650, P18424, P02651, Q06000	710	5	20099	22.6468	0.784368	0.00947509	0.00885297
GOTERM_BP_DIRECT	GO:0055090~acylglycerol homeostasis	4	0.55325	0.000414446	P02650, Q9QUH3, P04639, P02651	710	5	20099	22.6468	0.784368	0.00947509	0.00885297
GOTERM_BP_DIRECT	GO:0042756~drinking behavior	6	0.829876	0.000414743	P25095, P29089, P30904, P01015, P01179	710	19	20099	8.93951	0.784605	0.00947509	0.00885297
GOTERM_BP_DIRECT	GO:0051592~response to calcium ion	12	1.65975	0.000428579	P0DP30, P0DP31, P50398, P02680, P31044, P14668, P16975, P08494, P14480, P0DP29, P06399, P63259, P60711	710	93	20099	3.6527	0.795362	0.00973111	0.00909219
GOTERM_BP_DIRECT	GO:0030199~collagen fibril organization	10	1.38313	0.000439034	Q07936, P05539, Q5U367, P35444, P13941, P16636, P02466, P02454, P20909, P07897	710	65	20099	4.35515	0.803132	0.00990771	0.00925719
GOTERM_BP_DIRECT	GO:0000027~ribosomal large subunit assembly	7	0.968188	0.000447353	P19945, P62914, P09895, P83732, P62752, P21533	710	29	20099	6.83307	0.809103	0.0100343	0.00937543
GOTERM_BP_DIRECT	GO:0007219~Notch signaling pathway	14	1.93638	0.000599375	P17246, P13221, P06866, Q9R172, P08592, Q10743, P17074, Q9QW30, Q63198, Q5ZQU0, P16290, P32038	710	128	20099	3.09624	0.891277	0.0133492	0.0124727
GOTERM_BP_DIRECT	GO:0006957~complement activation, alternative pathway	5	0.691563	0.000605963	Q62930, P55314, P08650, P01026, P32038	710	12	20099	11.7952	0.893897	0.0133492	0.0124727
GOTERM_BP_DIRECT	GO:0015670~carbon dioxide transport	5	0.691563	0.000605963	P01946, P11517, P02091, P27139	710	12	20099	11.7952	0.893897	0.0133492	0.0124727
GOTERM_BP_DIRECT	GO:0071260~cellular response to mechanical stimulus	15	2.07469	0.000625611	P18292, Q62812, P05539, P49134, P17246, P13221, P00787, P22355, P01346, Q00918, P01015, Q5XI73, P62775, P02454, Q6RUV5	710	145	20099	2.92846	0.901344	0.0137005	0.012801
GOTERM_BP_DIRECT	GO:0031334~positive regulation of protein-containing complex assembly	9	1.24481	0.000647775	P17246, P63245, P62909, P46462, Q99376, O88767, P05371, P61589	710	55	20099	4.63229	0.909118	0.0141024	0.0131765
GOTERM_BP_DIRECT	GO:0000462~maturation of SSU-rRNA from tricistronic rRNA transcript (SSU-rRNA, 5.8S rRNA, LSU-rRNA)	7	0.968188	0.000653044	P62243, P62250, P17074	710	31	20099	6.39223	0.910874	0.014134	0.013206
GOTERM_BP_DIRECT	GO:0008217~regulation of blood pressure	11	1.52144	0.000667864	P62738, P25095, P29089, P68035, P07808, P47820, P01015, P02466, P07632	710	83	20099	3.75172	0.915634	0.0143707	0.0134272
GOTERM_BP_DIRECT	GO:0048678~response to axon injury	10	1.38313	0.000686908	Q62952, P23593, O08775, P58751, P53813, P11232, P14841, Q00495, P11762, P07632	710	69	20099	4.10267	0.921379	0.0146951	0.0137302
GOTERM_BP_DIRECT	GO:0035902~response to immobilization stress	9	1.24481	0.000732749	P13221, P17246, Q6P6V0, P29089, Q62935, Q5M7U6, P63259, P60711	710	56	20099	4.54957	0.933656	0.0155856	0.0145623
GOTERM_BP_DIRECT	GO:0010592~positive regulation of lamellipodium assembly	7	0.968188	0.000780034	P45592, Q4V7C7, Q5M7U6, P82995, P85845, Q6RUV5	710	32	20099	6.19247	0.944314	0.0164966	0.0154135
GOTERM_BP_DIRECT	GO:0071402~cellular response to lipoprotein particle stimulus	4	0.55325	0.00080713	P02650, Q7TMA5, P04638, P04639	710	6	20099	18.8723	0.949632	0.0165955	0.0155059
GOTERM_BP_DIRECT	GO:0034380~high-density lipoprotein particle assembly	4	0.55325	0.00080713	P02650, P04638, P04639, P14630	710	6	20099	18.8723	0.949632	0.0165955	0.0155059
GOTERM_BP_DIRECT	GO:1902951~negative regulation of dendritic spine maintenance	4	0.55325	0.00080713	P02650, P45592, P13852	710	6	20099	18.8723	0.949632	0.0165955	0.0155059
GOTERM_BP_DIRECT	GO:0002035~brain renin-angiotensin system	4	0.55325	0.00080713	P25095, P30904, P01015	710	6	20099	18.8723	0.949632	0.0165955	0.0155059
GOTERM_BP_DIRECT	GO:0046166~glyceraldehyde-3-phosphate biosynthetic process	4	0.55325	0.00080713	P48500, P50137	710	6	20099	18.8723	0.949632	0.0165955	0.0155059
GOTERM_BP_DIRECT	GO:0030198~extracellular matrix organization	17	2.35131	0.000839592	Q4FZU4, Q9WUQ1, P05539, Q62935, P04937, P13941, Q99372, Q10739, P33436, P20909, P35248, Q9WVH8, P08592, P08460, P01015, P02466, P02454	710	184	20099	2.61545	0.955338	0.0171676	0.0160404
GOTERM_BP_DIRECT	GO:0032570~response to progesterone	10	1.38313	0.00084807	P17246, Q6P6V0, P47727, P58751, P30904, P01026, P01179, P63018	710	71	20099	3.98711	0.956719	0.0172456	0.0161133
GOTERM_BP_DIRECT	GO:0009629~response to gravity	6	0.829876	0.000860375	P16310, P11980, P16975, P07897, P70623	710	22	20099	7.72049	0.958647	0.017379	0.016238
GOTERM_BP_DIRECT	GO:0043161~proteasome-mediated ubiquitin-dependent protein catabolic process	25	3.45781	0.000864022	P60901, P28077, P62839, P28075, P46462, P28073, Q9EQX9, P34067, Q4FZT9, P18420, P18422, Q4KMA2, P62198, O35987, P40112, P61078, P17220, P34064, Q7TP40, P40307, P48004, P21670, O88761, Q4KM35	710	335	20099	2.11257	0.959202	0.017379	0.016238
GOTERM_BP_DIRECT	GO:0048026~positive regulation of mRNA splicing, via spliceosome	7	0.968188	0.000925267	D4AE41, P84586, O35244, Q925G0, Q4V898, P63018	710	33	20099	6.00482	0.967483	0.0182348	0.0170375
GOTERM_BP_DIRECT	GO:0051894~positive regulation of focal adhesion assembly	7	0.968188	0.000925267	Q99PS8, O08775, P45592, Q62812, Q64610, Q6RUV5	710	33	20099	6.00482	0.967483	0.0182348	0.0170375
GOTERM_BP_DIRECT	GO:0034614~cellular response to reactive oxygen species	9	1.24481	0.000929565	Q9R063, P62909, Q64240, O88767, P10960, P04692, Q9Z0V6, P33436	710	58	20099	4.39269	0.967997	0.0182348	0.0170375
GOTERM_BP_DIRECT	GO:0030099~myeloid cell differentiation	8	1.1065	0.000931202	P11517, O88797, P02091, Q9Z0V6, P63159	710	45	20099	5.03261	0.96819	0.0182348	0.0170375
GOTERM_BP_DIRECT	GO:0055093~response to hyperoxia	8	1.1065	0.000931202	P30836, P22355, P11598, Q99372, P33436, P02454, P35248, P04762	710	45	20099	5.03261	0.96819	0.0182348	0.0170375
GOTERM_BP_DIRECT	GO:0008360~regulation of cell shape	14	1.93638	0.00106013	P18292, Q62812, Q91ZN1, P04937, Q00495, Q5RKI0, O08775, P07150, O35763, P05065, P04692, Q5XI73, Q6RUV5	710	136	20099	2.91411	0.98027	0.0203696	0.0190322
GOTERM_BP_DIRECT	GO:0051412~response to corticosterone	8	1.1065	0.00106542	P0DP30, P0DP31, P25095, P23764, P58751, P35577, P0DP29, P31044	710	46	20099	4.92321	0.980653	0.0203696	0.0190322
GOTERM_BP_DIRECT	GO:0051450~myoblast proliferation	6	0.829876	0.00106774	P08025, P04041, P63159, Q00495	710	23	20099	7.38481	0.980819	0.0203696	0.0190322
GOTERM_BP_DIRECT	GO:1990776~response to angiotensin	6	0.829876	0.00106774	P42930, P97571, P25095, P29089, P13941, P01015	710	23	20099	7.38481	0.980819	0.0203696	0.0190322
GOTERM_BP_DIRECT	GO:2000059~negative regulation of ubiquitin-dependent protein catabolic process	6	0.829876	0.00106774	P62914, P09895, P62083, O70593, P62832	710	23	20099	7.38481	0.980819	0.0203696	0.0190322
GOTERM_BP_DIRECT	GO:0045454~cell redox homeostasis	7	0.968188	0.00109044	P35704, Q9R063, O35244, Q63716, P04041, Q9Z0V6, P11232	710	34	20099	5.82821	0.982366	0.020696	0.0193371
GOTERM_BP_DIRECT	GO:0000902~cell morphogenesis	14	1.93638	0.0011344	P17246, Q08163, Q62812, Q9R0T4, P58751, P05371, P61589, O88797, P63159, Q9Z1Y3, Q4KM35	710	137	20099	2.89283	0.985016	0.0214205	0.020014
GOTERM_BP_DIRECT	GO:0033591~response to L-ascorbic acid	5	0.691563	0.00115825	P06866, Q62935, P04906, P16975, P04762	710	14	20099	10.1102	0.986284	0.0214334	0.0200261
GOTERM_BP_DIRECT	GO:0032732~positive regulation of interleukin-1 production	5	0.691563	0.00115825	P97840, P63159, P02764	710	14	20099	10.1102	0.986284	0.0214334	0.0200261
GOTERM_BP_DIRECT	GO:0006734~NADH metabolic process	5	0.691563	0.00115825	P04636, O88989, P46462, O35077, P13697	710	14	20099	10.1102	0.986284	0.0214334	0.0200261
GOTERM_BP_DIRECT	GO:0034116~positive regulation of heterotypic cell-cell adhesion	5	0.691563	0.00115825	P02680, P26051, P14480, P06399, Q02759	710	14	20099	10.1102	0.986284	0.0214334	0.0200261
GOTERM_BP_DIRECT	GO:0051897~positive regulation of phosphatidylinositol 3-kinase/protein kinase B signal transduction	18	2.48963	0.00117022	P28576, P24594, P18292, P49134, P58751, P04937, P53813, P11232, Q00495, P17246, O08775, O88767, P08025, P04041, P01346, P01015, Q6RUV5, P04762	710	208	20099	2.44977	0.986879	0.0215473	0.0201325
GOTERM_BP_DIRECT	GO:0006869~lipid transport	12	1.65975	0.0011975	P02650, P23593, P55797, P06759, Q7TMA5, Q9QUH3, P04638, P19939, P55053, P14630, Q63313, P02651	710	105	20099	3.23525	0.98814	0.0219403	0.0204998
GOTERM_BP_DIRECT	GO:0045214~sarcomere organization	8	1.1065	0.00121436	P50463, P09739, P49134, P47875, P04692, P63259, Q5RKI0, P60711, D3ZHA0	710	47	20099	4.81846	0.988858	0.0221396	0.020686
GOTERM_BP_DIRECT	GO:0090303~positive regulation of wound healing	7	0.968188	0.0012773	P07150, P49134, Q99PP0, P63159, P63259, P60711	710	35	20099	5.66169	0.991176	0.023173	0.0216515
GOTERM_BP_DIRECT	GO:0042632~cholesterol homeostasis	12	1.65975	0.00129456	P02650, P06759, Q7TMA5, Q9QUH3, P04638, P04639, P59996, P18424, P02651, P70623, Q06000, P54316	710	106	20099	3.20473	0.991723	0.0232842	0.0217554
GOTERM_BP_DIRECT	GO:0007010~cytoskeleton organization	14	1.93638	0.00129601	Q08163, P45592, Q6P9T8, P69897, Q3KRE8, P61589, P97710, Q5XIF6, P68370, P85108, P47942, Q6RUV5	710	139	20099	2.85121	0.991767	0.0232842	0.0217554
GOTERM_BP_DIRECT	GO:0030490~maturation of SSU-rRNA	6	0.829876	0.00130996	P62859, P17074	710	24	20099	7.07711	0.992182	0.0234211	0.0218833
GOTERM_BP_DIRECT	GO:0030043~actin filament fragmentation	4	0.55325	0.00137546	P45592, Q7M0E3, Q5RKI0	710	7	20099	16.1763	0.993867	0.0238994	0.0223302
GOTERM_BP_DIRECT	GO:0072144~glomerular mesangial cell development	4	0.55325	0.00137546	P62738, P68035	710	7	20099	16.1763	0.993867	0.0238994	0.0223302
GOTERM_BP_DIRECT	GO:0051918~negative regulation of fibrinolysis	4	0.55325	0.00137546	Q99PS8, Q9EQV9, Q01177, P26644	710	7	20099	16.1763	0.993867	0.0238994	0.0223302
GOTERM_BP_DIRECT	GO:2001200~positive regulation of dendritic cell differentiation	4	0.55325	0.00137546	P97840, P63159	710	7	20099	16.1763	0.993867	0.0238994	0.0223302
GOTERM_BP_DIRECT	GO:0042158~lipoprotein biosynthetic process	4	0.55325	0.00137546	P02650, Q7TMA5, P04639, P18424	710	7	20099	16.1763	0.993867	0.0238994	0.0223302
GOTERM_BP_DIRECT	GO:0060266~negative regulation of respiratory burst involved in inflammatory response	4	0.55325	0.00137546	P17074, P23785	710	7	20099	16.1763	0.993867	0.0238994	0.0223302
GOTERM_BP_DIRECT	GO:0071364~cellular response to epidermal growth factor stimulus	9	1.24481	0.0014495	P35859, P62630, P45592, Q6AXN6, Q4V7C7, O88797, P04906, P62632, P02454	710	62	20099	4.10929	0.995339	0.0250682	0.0234223
GOTERM_BP_DIRECT	GO:0046686~response to cadmium ion	8	1.1065	0.00156083	P13221, Q6P6V0, P00173, P07151, P16975, P13852, P06214, P04762	710	49	20099	4.62179	0.996915	0.026868	0.0251039
GOTERM_BP_DIRECT	GO:0030316~osteoclast differentiation	9	1.24481	0.00161	P06765, P17246, Q99376, P12346, Q99PP0, Q6P7Q4, P27139, Q00495	710	63	20099	4.04406	0.997429	0.0275862	0.0257749
GOTERM_BP_DIRECT	GO:0046034~ATP metabolic process	7	0.968188	0.00172341	P39069, A0JPJ7, P62815, P46462, P12847, P63018	710	37	20099	5.35565	0.998311	0.0292585	0.0273374
GOTERM_BP_DIRECT	GO:0050807~regulation of synapse organization	7	0.968188	0.00172341	P02650, P24054, P69897, P46462, P25304, P68370, P16975	710	37	20099	5.35565	0.998311	0.0292585	0.0273374
GOTERM_BP_DIRECT	GO:0030307~positive regulation of cell growth	11	1.52144	0.00175711	P01186, P18292, P45592, Q10743, P61589, P08025, P21743, Q10739, P62775, Q91ZT1	710	94	20099	3.31269	0.99851	0.0296944	0.0277447
GOTERM_BP_DIRECT	GO:0071356~cellular response to tumor necrosis factor	16	2.213	0.00184043	P29534, Q62764, P62909, P45592, Q4V7C7, P05539, O35077, Q00495, P70623, Q80WY6, Q99MH3, Q7TMA5, P22985, P02454	710	180	20099	2.51631	0.998906	0.0309611	0.0289282
GOTERM_BP_DIRECT	GO:0050728~negative regulation of inflammatory response	14	1.93638	0.00189975	P02650, P06765, Q6IMF3, P26051, P97840, P97710, P04639, P31394, Q80WY6, Q99MH3, Q9QZQ5, P62329, P07632, P23785	710	145	20099	2.73323	0.999122	0.0316008	0.0295259
GOTERM_BP_DIRECT	GO:0045821~positive regulation of glycolytic process	6	0.829876	0.00191261	Q00981, P08592, P30904, P08025, O35077	710	26	20099	6.53272	0.999163	0.0316008	0.0295259
GOTERM_BP_DIRECT	GO:0033197~response to vitamin E	6	0.829876	0.00191261	P30904, P04041, P02764, P06214, P04762	710	26	20099	6.53272	0.999163	0.0316008	0.0295259
GOTERM_BP_DIRECT	GO:0042026~protein refolding	6	0.829876	0.00191261	P42930, P23928, P07151, P06761, P63018	710	26	20099	6.53272	0.999163	0.0316008	0.0295259
GOTERM_BP_DIRECT	GO:0009636~response to toxic substance	13	1.79806	0.0019217	P07338, P55159, Q9R0T4, P58751, P31044, P04906, P14841, P70645, Q68FP2, P04041, P06399, P06214, P04762	710	128	20099	2.87508	0.99919	0.0316098	0.0295343
GOTERM_BP_DIRECT	GO:0060999~positive regulation of dendritic spine development	7	0.968188	0.00198644	P02650, P45592, P61980, Q6RUV5, P23785	710	38	20099	5.21471	0.999363	0.0320346	0.0299312
GOTERM_BP_DIRECT	GO:0030042~actin filament depolymerization	5	0.691563	0.0019908	P45592, Q7M0E3, Q68FP1, Q5RKI0	710	16	20099	8.84639	0.999373	0.0320346	0.0299312
GOTERM_BP_DIRECT	GO:0097067~cellular response to thyroid hormone stimulus	5	0.691563	0.0019908	Q02765, Q3T1J1, P00787, P07154, P02466	710	16	20099	8.84639	0.999373	0.0320346	0.0299312
GOTERM_BP_DIRECT	GO:0010744~positive regulation of macrophage derived foam cell differentiation	5	0.691563	0.0019908	P06765, P25095, Q7TMA5, P01015, Q06000	710	16	20099	8.84639	0.999373	0.0320346	0.0299312
GOTERM_BP_DIRECT	GO:0071493~cellular response to UV-B	5	0.691563	0.0019908	P63255, P17078, P35427	710	16	20099	8.84639	0.999373	0.0320346	0.0299312
GOTERM_BP_DIRECT	GO:0001822~kidney development	17	2.35131	0.00211265	Q9WUQ1, P29089, P25095, P59996, Q9JLJ3, P37996, P61980, P61589, O88600, P47820, P08650, P01015, P27139, P63018, P04762	710	201	20099	2.39425	0.999601	0.0334677	0.0312703
GOTERM_BP_DIRECT	GO:0061684~chaperone-mediated autophagy	4	0.55325	0.00214316	P34058, P82995, P63018	710	8	20099	14.1542	0.999644	0.0334677	0.0312703
GOTERM_BP_DIRECT	GO:0019674~NAD metabolic process	4	0.55325	0.00214316	P04642, P42123, O88989	710	8	20099	14.1542	0.999644	0.0334677	0.0312703
GOTERM_BP_DIRECT	GO:0010760~negative regulation of macrophage chemotaxis	4	0.55325	0.00214316	P80254, P30904, P08650	710	8	20099	14.1542	0.999644	0.0334677	0.0312703
GOTERM_BP_DIRECT	GO:0006785~heme B biosynthetic process	4	0.55325	0.00214316	Q3B7D0, P32362, P19356, P06214	710	8	20099	14.1542	0.999644	0.0334677	0.0312703
GOTERM_BP_DIRECT	GO:0072378~blood coagulation, fibrin clot formation	4	0.55325	0.00214316	P02680, P14480, O08619, P06399	710	8	20099	14.1542	0.999644	0.0334677	0.0312703
GOTERM_BP_DIRECT	GO:0097350~neutrophil clearance	4	0.55325	0.00214316	P07150, P63159	710	8	20099	14.1542	0.999644	0.0334677	0.0312703
GOTERM_BP_DIRECT	GO:0040008~regulation of growth	6	0.829876	0.00228002	P24594, P15473, P21744, Q62918, P25236, P50137	710	27	20099	6.29077	0.999786	0.0354552	0.0331273
GOTERM_BP_DIRECT	GO:0051092~positive regulation of NF-kappaB transcription factor activity	13	1.79806	0.00233628	P26342, P62909, P60901, P97840, Q9EQX9, P10111, Q63621, P17246, Q99376, P05371, Q9Z0V6, P62775, P04762	710	131	20099	2.80924	0.999826	0.0361781	0.0338027
GOTERM_BP_DIRECT	GO:0006417~regulation of translation	13	1.79806	0.00248967	P04797, P63245, P62909, P08592, P63174, Q925G0, P08025, P35427, Q6AYD3, Q6AXS5	710	132	20099	2.78795	0.999902	0.0383928	0.0358721
GOTERM_BP_DIRECT	GO:0033138~positive regulation of peptidyl-serine phosphorylation	10	1.38313	0.00257686	P01186, P08592, P26051, Q99376, O88767, P30904, Q9EPC6, P01015, P11232	710	83	20099	3.41066	0.999929	0.0395724	0.0369742
GOTERM_BP_DIRECT	GO:0042311~vasodilation	9	1.24481	0.00263517	P02650, P08934, P02770, P08932, O08775, Q5U367, P04041, P01015, P01048	710	68	20099	3.74671	0.999943	0.0403007	0.0376547
GOTERM_BP_DIRECT	GO:0060348~bone development	11	1.52144	0.00278782	P28576, P41123, P05539, Q99PP0, P08025, P47853, Q10739, P16975, P24368	710	100	20099	3.11393	0.999967	0.0424597	0.0396719
GOTERM_BP_DIRECT	GO:2001056~positive regulation of cysteine-type endopeptidase activity	9	1.24481	0.00289068	P63245, P62909, Q9EST6, Q71TY3, P97840, P24051, Q68FP1, P63159, P22985, P50115	710	69	20099	3.69241	0.999978	0.043667	0.0408
GOTERM_BP_DIRECT	GO:0032757~positive regulation of interleukin-8 production	9	1.24481	0.00289068	P97840, P04638, O88767, P12346, P63159, Q9WTS8, Q63313	710	69	20099	3.69241	0.999978	0.043667	0.0408
GOTERM_BP_DIRECT	GO:0031638~zymogen activation	7	0.968188	0.00295894	P06866, P16296, D3ZTE0, P07154, Q8CHN8, Q6IE64, Q10739	710	41	20099	4.83315	0.999983	0.0445164	0.0415936
GOTERM_BP_DIRECT	GO:0016485~protein processing	11	1.52144	0.00299889	Q8K3U6, P15684, D3ZTE0, Q10743, Q02765, P12346, P35444, Q9EQV8, P59996, Q01177, P35446	710	101	20099	3.0831	0.999985	0.0449348	0.0419845
GOTERM_BP_DIRECT	GO:0071320~cellular response to cAMP	10	1.38313	0.00303372	P24594, P19945, P08592, P12346, O35077, P02401, P35427, P06761, P09006	710	85	20099	3.33041	0.999987	0.0452733	0.0423008
GOTERM_BP_DIRECT	GO:0048034~heme O biosynthetic process	4	0.55325	0.00313079	Q3B7D0, P32362, P19356, P06214	710	9	20099	12.5815	0.999991	0.0459312	0.0429154
GOTERM_BP_DIRECT	GO:0072051~juxtaglomerular apparatus development	4	0.55325	0.00313079	P62738, P68035	710	9	20099	12.5815	0.999991	0.0459312	0.0429154
GOTERM_BP_DIRECT	GO:0006782~protoporphyrinogen IX biosynthetic process	4	0.55325	0.00313079	Q3B7D0, P32362, P19356, P06214	710	9	20099	12.5815	0.999991	0.0459312	0.0429154
GOTERM_BP_DIRECT	GO:0030185~nitric oxide transport	4	0.55325	0.00313079	P01946, P11517, P02091	710	9	20099	12.5815	0.999991	0.0459312	0.0429154
GOTERM_BP_DIRECT	GO:0038166~angiotensin-activated signaling pathway	5	0.691563	0.00316467	P25095, P29089, P47820, P01015, P27139	710	18	20099	7.86346	0.999992	0.0459312	0.0429154
GOTERM_BP_DIRECT	GO:0015671~oxygen transport	5	0.691563	0.00316467	Q9QZ76, P01946, P11517, P02091	710	18	20099	7.86346	0.999992	0.0459312	0.0429154
GOTERM_BP_DIRECT	GO:0043171~peptide catabolic process	5	0.691563	0.00316467	P15684, P30349, P24155, P47820, Q6IRK9	710	18	20099	7.86346	0.999992	0.0459312	0.0429154
GOTERM_BP_DIRECT	GO:0071276~cellular response to cadmium ion	7	0.968188	0.003351	P61078, P62839, Q68FP1, P63018, P07632, Q64610	710	42	20099	4.71808	0.999996	0.0484455	0.0452647
GOTERM_BP_DIRECT	GO:0001998~angiotensin-mediated vasoconstriction involved in regulation of systemic arterial blood pressure	3	0.414938	0.00364055	P05370, P61589, P01015	710	3	20099	28.3085	0.999999	0.050844	0.0475057
GOTERM_BP_DIRECT	GO:0009154~purine ribonucleotide catabolic process	3	0.414938	0.00364055	P62959	710	3	20099	28.3085	0.999999	0.050844	0.0475057
GOTERM_BP_DIRECT	GO:1900221~regulation of amyloid-beta clearance	3	0.414938	0.00364055	P02650, P08592, P05371	710	3	20099	28.3085	0.999999	0.050844	0.0475057
GOTERM_BP_DIRECT	GO:0072749~cellular response to cytochalasin B	3	0.414938	0.00364055	P63259, P60711	710	3	20099	28.3085	0.999999	0.050844	0.0475057
GOTERM_BP_DIRECT	GO:0050831~male-specific defense response to bacterium	3	0.414938	0.00364055	P63159	710	3	20099	28.3085	0.999999	0.050844	0.0475057
GOTERM_BP_DIRECT	GO:0002840~regulation of T cell mediated immune response to tumor cell	3	0.414938	0.00364055	P63159	710	3	20099	28.3085	0.999999	0.050844	0.0475057
GOTERM_BP_DIRECT	GO:1905455~positive regulation of myeloid progenitor cell differentiation	3	0.414938	0.00364055	P63159	710	3	20099	28.3085	0.999999	0.050844	0.0475057
GOTERM_BP_DIRECT	GO:0002019~regulation of renal output by angiotensin	3	0.414938	0.00364055	P25095, P29089, P01015	710	3	20099	28.3085	0.999999	0.050844	0.0475057
GOTERM_BP_DIRECT	GO:0090151~establishment of protein localization to mitochondrial membrane	3	0.414938	0.00364055	P0DP30, P0DP31, P0DP29	710	3	20099	28.3085	0.999999	0.050844	0.0475057
GOTERM_BP_DIRECT	GO:0010977~negative regulation of neuron projection development	10	1.38313	0.0038362	P02650, O35568, Q62952, Q00657, Q64605, P07151, P61589, O88797, P31000, P11762	710	88	20099	3.21687	0.999999	0.0533751	0.0498706
GOTERM_BP_DIRECT	GO:0099175~regulation of postsynapse organization	8	1.1065	0.00415982	Q64604, P61980, D4AE41, P84586, Q10743, Q4V898, P63018	710	58	20099	3.90461	1	0.0574458	0.0536741
GOTERM_BP_DIRECT	GO:0007162~negative regulation of cell adhesion	8	1.1065	0.00415982	P08934, P08932, Q99PS8, P45592, Q10743, P01048, P33436	710	58	20099	3.90461	1	0.0574458	0.0536741
GOTERM_BP_DIRECT	GO:0007163~establishment or maintenance of cell polarity	7	0.968188	0.00424935	Q4V7C7, Q5M7U6, P63259, P85845, P60711, Q6RUV5	710	44	20099	4.50362	1	0.0577163	0.0539267
GOTERM_BP_DIRECT	GO:0045597~positive regulation of cell differentiation	7	0.968188	0.00424935	P16310, Q9QZQ5, P34058, P05371, Q99PP0, Q9R1E9, Q6AYD3	710	44	20099	4.50362	1	0.0577163	0.0539267
GOTERM_BP_DIRECT	GO:0045727~positive regulation of translation	11	1.52144	0.00425302	P49242, Q71TY3, P24051, Q925G0, P61589, P09895, P62703, P05197, P02401	710	106	20099	2.93767	1	0.0577163	0.0539267
GOTERM_BP_DIRECT	GO:0070328~triglyceride homeostasis	6	0.829876	0.00427297	P02650, P55797, P06759, Q9QUH3, P04639, Q06000	710	31	20099	5.47905	1	0.0577163	0.0539267
GOTERM_BP_DIRECT	GO:0031643~positive regulation of myelination	6	0.829876	0.00427297	P61980, P12346, P08025, Q80WY6	710	31	20099	5.47905	1	0.0577163	0.0539267
GOTERM_BP_DIRECT	GO:0031640~killing of cells of another organism	6	0.829876	0.00427297	Q62930, P55314, P00697, P08650, Q811M5, P14423	710	31	20099	5.47905	1	0.0577163	0.0539267
GOTERM_BP_DIRECT	GO:0030836~positive regulation of actin filament depolymerization	4	0.55325	0.00435598	P45592, Q7M0E3, Q5RKI0	710	10	20099	11.3234	1	0.0582004	0.054379
GOTERM_BP_DIRECT	GO:0006784~heme A biosynthetic process	4	0.55325	0.00435598	Q3B7D0, P32362, P19356, P06214	710	10	20099	11.3234	1	0.0582004	0.054379
GOTERM_BP_DIRECT	GO:1904667~negative regulation of ubiquitin protein ligase activity	4	0.55325	0.00435598	P62914, P09895, P62083, P62832	710	10	20099	11.3234	1	0.0582004	0.054379
GOTERM_BP_DIRECT	GO:0021549~cerebellum development	10	1.38313	0.0044574	P39069, Q99J86, O35567, P61980, Q64605, Q63198, P63018, P07335	710	90	20099	3.14538	1	0.0593411	0.0554449
GOTERM_BP_DIRECT	GO:1990314~cellular response to insulin-like growth factor stimulus	5	0.691563	0.00473822	P17246, P45592, P05539, P08025	710	20	20099	7.07711	1	0.0624063	0.0583088
GOTERM_BP_DIRECT	GO:0034101~erythrocyte homeostasis	5	0.691563	0.00473822	P04644, Q6P6V0, Q63716	710	20	20099	7.07711	1	0.0624063	0.0583088
GOTERM_BP_DIRECT	GO:0071257~cellular response to electrical stimulus	5	0.691563	0.00473822	P28077, P08025, P63259, P60711	710	20	20099	7.07711	1	0.0624063	0.0583088
GOTERM_BP_DIRECT	GO:0050850~positive regulation of calcium-mediated signaling	7	0.968188	0.00475983	O08775, P08592, P62959, P13852, P13596	710	45	20099	4.40354	1	0.0624686	0.058367
GOTERM_BP_DIRECT	GO:1903076~regulation of protein localization to plasma membrane	6	0.829876	0.00491981	P63245, P50463, Q10739, P63259, P60711	710	32	20099	5.30783	1	0.0641134	0.0599039
GOTERM_BP_DIRECT	GO:0007017~microtubule-based process	6	0.829876	0.00491981	P69897, Q6P9T8, Q3KRE8, Q5XIF6, P68370, P85108	710	32	20099	5.30783	1	0.0641134	0.0599039
GOTERM_BP_DIRECT	GO:0006955~immune response	24	3.3195	0.00515988	P04466, P26342, Q63678, P06765, P31721, P01681, Q63514, P19132, P15978, Q811M5, Q63088, P10252, Q3SWT0, Q64610, Q80WY6, P63255, P01835, Q02765, P07151, P07154, P85973, Q9QZE3, P02773, Q4V885	710	363	20099	1.87163	1	0.0670061	0.0626066
GOTERM_BP_DIRECT	GO:0007204~positive regulation of cytosolic calcium ion concentration	15	2.07469	0.00527183	P08934, P01186, P08932, P29089, P25095, Q3T1J1, P97546, O08775, P08650, P01048, P63159, P01015, P01179	710	182	20099	2.33311	1	0.0682205	0.0637413
GOTERM_BP_DIRECT	GO:2001237~negative regulation of extrinsic apoptotic signaling pathway	7	0.968188	0.005314	P35704, P48508, O88767, O88797, P08025, P04906, P48679	710	46	20099	4.30781	1	0.0682885	0.0638049
GOTERM_BP_DIRECT	GO:0032689~negative regulation of type II interferon production	7	0.968188	0.005314	P97840, P63159, P17559, P47967, P13852	710	46	20099	4.30781	1	0.0682885	0.0638049
GOTERM_BP_DIRECT	GO:0060586~multicellular organismal-level iron ion homeostasis	6	0.829876	0.00563312	Q99MH3, Q920H8, Q99376, P07151, P12346, P97603	710	33	20099	5.14699	1	0.0716825	0.0669759
GOTERM_BP_DIRECT	GO:0019433~triglyceride catabolic process	5	0.691563	0.00569203	P06759, Q7TMA5, Q9QUH3, Q06000, P54316	710	21	20099	6.74011	1	0.0716825	0.0669759
GOTERM_BP_DIRECT	GO:0002548~monocyte chemotaxis	5	0.691563	0.00569203	P06765, P07150, P17074	710	21	20099	6.74011	1	0.0716825	0.0669759
GOTERM_BP_DIRECT	GO:0042310~vasoconstriction	5	0.691563	0.00569203	P01186, P25095, P48199, P47820, P01015	710	21	20099	6.74011	1	0.0716825	0.0669759
GOTERM_BP_DIRECT	GO:0009651~response to salt stress	5	0.691563	0.00569203	P25095, P29089, P34058, P82995, P01015	710	21	20099	6.74011	1	0.0716825	0.0669759
GOTERM_BP_DIRECT	GO:0042060~wound healing	9	1.24481	0.00569431	Q4FZU2, Q9R172, P08025, P04937, P13941, Q9QW30, P04692, Q02759, Q3SWT0	710	77	20099	3.30878	1	0.0716825	0.0669759
GOTERM_BP_DIRECT	GO:0060314~regulation of ryanodine-sensitive calcium-release channel activity	4	0.55325	0.00583365	P0DP30, P0DP31, Q62658, P0DP29	710	11	20099	10.294	1	0.0731876	0.0683823
GOTERM_BP_DIRECT	GO:0010811~positive regulation of cell-substrate adhesion	7	0.968188	0.00591394	P08460, P49134, P07808, P08721, Q02759, Q6RUV5	710	47	20099	4.21615	1	0.0739443	0.0690892
GOTERM_BP_DIRECT	GO:0007165~signal transduction	50	6.91563	0.00624476	P26342, P04638, P35213, Q62840, P11762, P07150, P68255, P05371, P61589, P02767, P61983, P08721, P20156, P23785, P28576, P24054, Q63228, Q99PP0, P17559, Q62894, Q7TMA5, Q80T18, O88201, P01346, P63018, Q5XHY7, P08934, P01186, P08932, Q64604, Q64605, P07808, P10252, O88959, Q99MH3, P63102, Q6P6V0, P68511, P30904, P08025, P01179, P06882, P35427, P62260, Q9QZQ5, P15083, P49744, Q9R1E9, P09320, P63159	710	961	20099	1.47286	1	0.0778176	0.0727083
GOTERM_BP_DIRECT	GO:0007519~skeletal muscle tissue development	10	1.38313	0.0063544	P04642, P04466, Q64119, P00787, P61589, Q99372, Q00495, P63018	710	95	20099	2.97984	1	0.0786745	0.0735089
GOTERM_BP_DIRECT	GO:0030308~negative regulation of cell growth	12	1.65975	0.00635603	P04764, P17246, P63245, Q99PS8, P23928, Q9QZQ5, P97586, Q9WUH4, O88797, P24090, Q9QYV0, P01015	710	130	20099	2.61309	1	0.0786745	0.0735089
GOTERM_BP_DIRECT	GO:0065003~protein-containing complex assembly	12	1.65975	0.00672451	P26342, P06765, P23680, P02680, P08494, P14480, P24090, P63159, P06399, Q62740	710	131	20099	2.59314	1	0.0822413	0.0768415
GOTERM_BP_DIRECT	GO:0009743~response to carbohydrate	5	0.691563	0.00676573	P13221, Q7TMA5, P00884, P14841, P19356	710	22	20099	6.43374	1	0.0822413	0.0768415
GOTERM_BP_DIRECT	GO:0046470~phosphatidylcholine metabolic process	5	0.691563	0.00676573	P55159, Q8R2H5, P14423, P18424, P02651	710	22	20099	6.43374	1	0.0822413	0.0768415
GOTERM_BP_DIRECT	GO:0051131~chaperone-mediated protein complex assembly	5	0.691563	0.00676573	P34058, P05371, O88600, P82995, P83868	710	22	20099	6.43374	1	0.0822413	0.0768415
GOTERM_BP_DIRECT	GO:0044342~type B pancreatic cell proliferation	5	0.691563	0.00676573	P24594, P15473, P21744, Q9QZQ5, P08025	710	22	20099	6.43374	1	0.0822413	0.0768415
GOTERM_BP_DIRECT	GO:0016042~lipid catabolic process	10	1.38313	0.00679875	Q63108, P10959, P09527, P06759, Q7TMA5, O35244, P14423, P02651, Q06000, P54316	710	96	20099	2.9488	1	0.0822413	0.0768415
GOTERM_BP_DIRECT	GO:0016525~negative regulation of angiogenesis	12	1.65975	0.00710949	O70367, P06765, P05545, Q9WUQ1, Q99PS8, Q9WVH8, P16617, P49744, P01015, P16975, P26644	710	132	20099	2.5735	1	0.0822413	0.0768415
GOTERM_BP_DIRECT	GO:0019682~glyceraldehyde-3-phosphate metabolic process	3	0.414938	0.00711084	P48500	710	4	20099	21.2313	1	0.0822413	0.0768415
GOTERM_BP_DIRECT	GO:0017055~negative regulation of RNA polymerase II transcription preinitiation complex assembly	3	0.414938	0.00711084	P63159	710	4	20099	21.2313	1	0.0822413	0.0768415
GOTERM_BP_DIRECT	GO:0002270~plasmacytoid dendritic cell activation	3	0.414938	0.00711084	P63159	710	4	20099	21.2313	1	0.0822413	0.0768415
GOTERM_BP_DIRECT	GO:0002034~maintenance of blood vessel diameter homeostasis by renin-angiotensin	3	0.414938	0.00711084	P25095, P29089, P01015	710	4	20099	21.2313	1	0.0822413	0.0768415
GOTERM_BP_DIRECT	GO:1901842~negative regulation of high voltage-gated calcium channel activity	3	0.414938	0.00711084	P0DP30, P0DP31, P0DP29	710	4	20099	21.2313	1	0.0822413	0.0768415
GOTERM_BP_DIRECT	GO:0010037~response to carbon dioxide	3	0.414938	0.00711084	Q8K3U6, P06238, P23562	710	4	20099	21.2313	1	0.0822413	0.0768415
GOTERM_BP_DIRECT	GO:0030300~regulation of intestinal cholesterol absorption	3	0.414938	0.00711084	P04638, P04639, P02651	710	4	20099	21.2313	1	0.0822413	0.0768415
GOTERM_BP_DIRECT	GO:2000384~negative regulation of ectoderm development	3	0.414938	0.00711084	P63029	710	4	20099	21.2313	1	0.0822413	0.0768415
GOTERM_BP_DIRECT	GO:2000426~negative regulation of apoptotic cell clearance	3	0.414938	0.00711084	P63159	710	4	20099	21.2313	1	0.0822413	0.0768415
GOTERM_BP_DIRECT	GO:0002643~regulation of tolerance induction	3	0.414938	0.00711084	P63159	710	4	20099	21.2313	1	0.0822413	0.0768415
GOTERM_BP_DIRECT	GO:0051919~positive regulation of fibrinolysis	3	0.414938	0.00711084	P14272, D3ZTE0, Q01177	710	4	20099	21.2313	1	0.0822413	0.0768415
GOTERM_BP_DIRECT	GO:0061740~protein targeting to lysosome involved in chaperone-mediated autophagy	3	0.414938	0.00711084	P05371, P63018	710	4	20099	21.2313	1	0.0822413	0.0768415
GOTERM_BP_DIRECT	GO:0034756~regulation of iron ion transport	3	0.414938	0.00711084	P07151, P12346	710	4	20099	21.2313	1	0.0822413	0.0768415
GOTERM_BP_DIRECT	GO:0010903~negative regulation of very-low-density lipoprotein particle remodeling	3	0.414938	0.00711084	P06759, P04638, P04639	710	4	20099	21.2313	1	0.0822413	0.0768415
GOTERM_BP_DIRECT	GO:0045663~positive regulation of myoblast differentiation	6	0.829876	0.00727285	P50463, P15473, P63159, P35427	710	35	20099	4.85288	1	0.0835926	0.078104
GOTERM_BP_DIRECT	GO:0040014~regulation of multicellular organism growth	6	0.829876	0.00727285	Q99J86, P16310, P08592, P05370, P18297, P07632	710	35	20099	4.85288	1	0.0835926	0.078104
GOTERM_BP_DIRECT	GO:0035767~endothelial cell chemotaxis	4	0.55325	0.00757621	Q9QZQ5, P63159	710	12	20099	9.43615	1	0.0862756	0.0806109
GOTERM_BP_DIRECT	GO:0043568~positive regulation of insulin-like growth factor receptor signaling pathway	4	0.55325	0.00757621	P24594, P15473, P21744, P08025	710	12	20099	9.43615	1	0.0862756	0.0806109
GOTERM_BP_DIRECT	GO:0033595~response to genistein	4	0.55325	0.00757621	Q8K3U6, P08010, P11598, P14942, P06399	710	12	20099	9.43615	1	0.0862756	0.0806109
GOTERM_BP_DIRECT	GO:0001568~blood vessel development	9	1.24481	0.00770404	P26342, P25095, P29089, Q0PMD2, P13941, P16636, P01015, P02466, P02454	710	81	20099	3.14538	1	0.0874621	0.0817195
GOTERM_BP_DIRECT	GO:0032731~positive regulation of interleukin-1 beta production	8	1.1065	0.00780018	P42930, P08592, P97840, P63159, P02764, Q06000	710	65	20099	3.48412	1	0.0880136	0.0822348
GOTERM_BP_DIRECT	GO:0007595~lactation	8	1.1065	0.00780018	P19945, P14925, Q05982, P13635, P02665, P04276, P01179, P22985	710	65	20099	3.48412	1	0.0880136	0.0822348
GOTERM_BP_DIRECT	GO:0010880~regulation of release of sequestered calcium ion into cytosol by sarcoplasmic reticulum	5	0.691563	0.0079653	P0DP30, P0DP31, Q9Z339, P08010, P14942, P0DP29	710	23	20099	6.15401	1	0.0896036	0.0837204
GOTERM_BP_DIRECT	GO:0035924~cellular response to vascular endothelial growth factor stimulus	6	0.829876	0.00820594	P42930, P29534, O08775, P07150, P04937, Q91ZT1	710	36	20099	4.71808	1	0.0920308	0.0859883
GOTERM_BP_DIRECT	GO:0048286~lung alveolus development	8	1.1065	0.00846731	P28576, P17246, P24594, O08775, P08025, P47820, Q91ZT1, P35248	710	66	20099	3.43133	1	0.0941066	0.0879278
GOTERM_BP_DIRECT	GO:0010595~positive regulation of endothelial cell migration	8	1.1065	0.00846731	Q6P6V0, O08775, Q8R2H5, P01015, P16975, Q91ZT1, Q6RUV5, P23785	710	66	20099	3.43133	1	0.0941066	0.0879278
GOTERM_BP_DIRECT	GO:0051602~response to electrical stimulus	8	1.1065	0.00846731	P06866, P62630, P58751, P31044, P01179, P62632, P33436	710	66	20099	3.43133	1	0.0941066	0.0879278
GOTERM_BP_DIRECT	GO:0021766~hippocampus development	11	1.52144	0.0089558	P45592, P62260, P61980, Q64605, P62828, Q05982, P58751, P31044, P68370	710	118	20099	2.63892	1	0.0992378	0.0927221
GOTERM_BP_DIRECT	GO:0043588~skin development	8	1.1065	0.00917543	P28576, P11030, P30904, P35444, P13941, P02454, P83868	710	67	20099	3.38011	1	0.100766	0.0941503
GOTERM_BP_DIRECT	GO:0006898~receptor-mediated endocytosis	8	1.1065	0.00917543	P02650, Q08163, Q8CIZ5, P26051, O88797, P10719, P11442	710	67	20099	3.38011	1	0.100766	0.0941503
GOTERM_BP_DIRECT	GO:0007566~embryo implantation	8	1.1065	0.00917543	Q03626, Q5PPN5, Q63041, Q9R0T4, P14841, P33436, P07632, P23785	710	67	20099	3.38011	1	0.100766	0.0941503
GOTERM_BP_DIRECT	GO:0043403~skeletal muscle tissue regeneration	6	0.829876	0.00921883	P15429, P04041, P31000, P11980, P62775	710	37	20099	4.59056	1	0.100943	0.0943158
GOTERM_BP_DIRECT	GO:0001516~prostaglandin biosynthetic process	5	0.691563	0.00929637	P30904, P22057, P14423, P83868	710	24	20099	5.89759	1	0.101194	0.0945496
GOTERM_BP_DIRECT	GO:2000147~positive regulation of cell motility	5	0.691563	0.00929637	P45592, P12346, Q00495	710	24	20099	5.89759	1	0.101194	0.0945496
GOTERM_BP_DIRECT	GO:1990834~response to odorant	4	0.55325	0.00959379	P07154, Q10739, P63018	710	13	20099	8.71029	1	0.102325	0.0956062
GOTERM_BP_DIRECT	GO:1905907~negative regulation of amyloid fibril formation	4	0.55325	0.00959379	P02650, P23928, B0BN18, P05371	710	13	20099	8.71029	1	0.102325	0.0956062
GOTERM_BP_DIRECT	GO:2000491~positive regulation of hepatic stellate cell activation	4	0.55325	0.00959379	P62738, P68035	710	13	20099	8.71029	1	0.102325	0.0956062
GOTERM_BP_DIRECT	GO:0048251~elastic fiber assembly	4	0.55325	0.00959379	Q9WVH8, P13941, P16636, Q99372	710	13	20099	8.71029	1	0.102325	0.0956062
GOTERM_BP_DIRECT	GO:0046689~response to mercury ion	4	0.55325	0.00959379	P02770, P32362, P16290, P06214	710	13	20099	8.71029	1	0.102325	0.0956062
GOTERM_BP_DIRECT	GO:0045653~negative regulation of megakaryocyte differentiation	4	0.55325	0.00959379	P06765, P62804	710	13	20099	8.71029	1	0.102325	0.0956062
GOTERM_BP_DIRECT	GO:0001542~ovulation from ovarian follicle	4	0.55325	0.00959379	Q9WUQ1, P47727, P33436, P02773	710	13	20099	8.71029	1	0.102325	0.0956062
GOTERM_BP_DIRECT	GO:0051289~protein homotetramerization	8	1.1065	0.00992596	P07151, P27605, P05065, P13697, P11980, Q9JLJ3	710	68	20099	3.33041	1	0.105563	0.098632
GOTERM_BP_DIRECT	GO:2000379~positive regulation of reactive oxygen species metabolic process	6	0.829876	0.0103147	P47727, P18292, O88767, Q3T1J1, P97710, P22985	710	38	20099	4.46976	1	0.109383	0.102201
GOTERM_BP_DIRECT	GO:0007339~binding of sperm to zona pellucida	7	0.968188	0.0105917	Q9QX79, Q63514, P28480, O54767, P05065, Q6P502	710	53	20099	3.73885	1	0.112	0.104646
GOTERM_BP_DIRECT	GO:0051247~positive regulation of protein metabolic process	5	0.691563	0.0107642	P17246, P08592, P25095, P01015, P62775	710	25	20099	5.66169	1	0.113177	0.105746
GOTERM_BP_DIRECT	GO:0048771~tissue remodeling	5	0.691563	0.0107642	Q00657, P49744, Q01177, Q10739, P33436	710	25	20099	5.66169	1	0.113177	0.105746
GOTERM_BP_DIRECT	GO:0016477~cell migration	20	2.76625	0.0111259	P26342, Q64604, P26051, P49134, Q91ZN1, Q9R0T4, P58751, P97710, Q10739, P33436, Q9ET61, O08775, Q6AXN6, P35572, P61589, Q9R1E9, Q9Z1Y3, P85845, P29315, Q6RUV5	710	302	20099	1.87473	1	0.116649	0.10899
GOTERM_BP_DIRECT	GO:0044849~estrous cycle	6	0.829876	0.0114964	P07150, P05371, P27139, P63018, Q64610	710	39	20099	4.35515	1	0.117691	0.109963
GOTERM_BP_DIRECT	GO:0032967~positive regulation of collagen biosynthetic process	6	0.829876	0.0114964	P17246, Q9R063, P18292, Q9R1E9, P31000, Q00918	710	39	20099	4.35515	1	0.117691	0.109963
GOTERM_BP_DIRECT	GO:1901339~regulation of store-operated calcium channel activity	3	0.414938	0.0115751	P0DP30, P0DP31, P0DP29	710	5	20099	16.9851	1	0.117691	0.109963
GOTERM_BP_DIRECT	GO:0071642~positive regulation of macrophage inflammatory protein 1 alpha production	3	0.414938	0.0115751	P63159	710	5	20099	16.9851	1	0.117691	0.109963
GOTERM_BP_DIRECT	GO:0098883~synapse pruning	3	0.414938	0.0115751	P31722, P31721, P31720	710	5	20099	16.9851	1	0.117691	0.109963
GOTERM_BP_DIRECT	GO:0051621~regulation of norepinephrine uptake	3	0.414938	0.0115751	P63259, P60711	710	5	20099	16.9851	1	0.117691	0.109963
GOTERM_BP_DIRECT	GO:0140249~protein catabolic process at postsynapse	3	0.414938	0.0115751	P97571, Q07009, Q10743	710	5	20099	16.9851	1	0.117691	0.109963
GOTERM_BP_DIRECT	GO:0032425~positive regulation of mismatch repair	3	0.414938	0.0115751	P63159	710	5	20099	16.9851	1	0.117691	0.109963
GOTERM_BP_DIRECT	GO:0140056~organelle localization by membrane tethering	3	0.414938	0.0115751	P0DP30, P0DP31, P0DP29	710	5	20099	16.9851	1	0.117691	0.109963
GOTERM_BP_DIRECT	GO:0032392~DNA geometric change	3	0.414938	0.0115751	P63159	710	5	20099	16.9851	1	0.117691	0.109963
GOTERM_BP_DIRECT	GO:0010988~regulation of low-density lipoprotein particle clearance	3	0.414938	0.0115751	P61980, P48199	710	5	20099	16.9851	1	0.117691	0.109963
GOTERM_BP_DIRECT	GO:0001819~positive regulation of cytokine production	9	1.24481	0.0116607	P04797, O70534, P25095, P97840, P30904, P01015, P07632	710	87	20099	2.92846	1	0.118236	0.110473
GOTERM_BP_DIRECT	GO:0006518~peptide metabolic process	4	0.55325	0.0118944	P24155, P14925, P47820, Q9EQV8	710	14	20099	8.08813	1	0.118976	0.111164
GOTERM_BP_DIRECT	GO:0045646~regulation of erythrocyte differentiation	4	0.55325	0.0118944	P11517, P07151, P02091	710	14	20099	8.08813	1	0.118976	0.111164
GOTERM_BP_DIRECT	GO:0006754~ATP biosynthetic process	4	0.55325	0.0118944	P17246, P05065, P10719	710	14	20099	8.08813	1	0.118976	0.111164
GOTERM_BP_DIRECT	GO:0097435~supramolecular fiber organization	4	0.55325	0.0118944	Q62658, P34058, P13941, P14841	710	14	20099	8.08813	1	0.118976	0.111164
GOTERM_BP_DIRECT	GO:0034333~adherens junction assembly	4	0.55325	0.0118944	P85972, P63259, P60711	710	14	20099	8.08813	1	0.118976	0.111164
GOTERM_BP_DIRECT	GO:0031175~neuron projection development	15	2.07469	0.0121543	P02650, P08592, P26051, P49134, Q9R0T4, P13668, P07808, Q63198, P31000, P63159, P13596, Q6RUV5	710	201	20099	2.11257	1	0.121248	0.113287
GOTERM_BP_DIRECT	GO:0055010~ventricular cardiac muscle tissue morphogenesis	5	0.691563	0.0123735	P26342, P17246, Q62658, P04692, P20909	710	26	20099	5.44393	1	0.123103	0.115021
GOTERM_BP_DIRECT	GO:0051781~positive regulation of cell division	6	0.829876	0.012767	P28576, P17246, P49744, P01346, P62961, P04762	710	40	20099	4.24627	1	0.126677	0.11836
GOTERM_BP_DIRECT	GO:0030334~regulation of cell migration	11	1.52144	0.0131196	P63312, P85972, P13668, P61589, P62329, Q6P6Q2, Q3SWT0, P48679, Q64610, Q6RUV5	710	125	20099	2.49114	1	0.129828	0.121303
GOTERM_BP_DIRECT	GO:0007517~muscle organ development	7	0.968188	0.0137146	P39069, P23928, P50463, Q9WUH4, P49134, Q5U349, P48679	710	56	20099	3.53856	1	0.134994	0.12613
GOTERM_BP_DIRECT	GO:0045907~positive regulation of vasoconstriction	7	0.968188	0.0137146	P01186, P02680, P14480, P61589, P47820, P06399, P10354	710	56	20099	3.53856	1	0.134994	0.12613
GOTERM_BP_DIRECT	GO:0016540~protein autoprocessing	5	0.691563	0.0141289	P97571, D3ZTE0, Q07009, P07154, P59996	710	27	20099	5.24231	1	0.138339	0.129256
GOTERM_BP_DIRECT	GO:0001824~blastocyst development	6	0.829876	0.0141292	P26342, P41123, Q8CIZ5, Q07009	710	41	20099	4.1427	1	0.138339	0.129256
GOTERM_BP_DIRECT	GO:0085029~extracellular matrix assembly	4	0.55325	0.0144841	P17246, Q99372, Q6IUU3, P02466	710	15	20099	7.54892	1	0.139492	0.130333
GOTERM_BP_DIRECT	GO:0060347~heart trabecula formation	4	0.55325	0.0144841	P26342, Q9WUQ1, Q62658, P04916	710	15	20099	7.54892	1	0.139492	0.130333
GOTERM_BP_DIRECT	GO:0019953~sexual reproduction	4	0.55325	0.0144841	Q6P502, P02773, P20156, P25236	710	15	20099	7.54892	1	0.139492	0.130333
GOTERM_BP_DIRECT	GO:1902074~response to salt	4	0.55325	0.0144841	P17246, P61980, O88797	710	15	20099	7.54892	1	0.139492	0.130333
GOTERM_BP_DIRECT	GO:0051597~response to methylmercury	4	0.55325	0.0144841	Q3B7D0, P32362, P19356, P06214	710	15	20099	7.54892	1	0.139492	0.130333
GOTERM_BP_DIRECT	GO:0001780~neutrophil homeostasis	4	0.55325	0.0144841	P27653, P07150, P08650, Q00495	710	15	20099	7.54892	1	0.139492	0.130333
GOTERM_BP_DIRECT	GO:0007623~circadian rhythm	12	1.65975	0.0145108	Q8K3U6, P22355, P08025, P25304, P11598, P63159, P23562, P63259, P60711	710	146	20099	2.32672	1	0.139492	0.130333
GOTERM_BP_DIRECT	GO:0042130~negative regulation of T cell proliferation	7	0.968188	0.0148845	P08934, P17246, P08932, P01048, P17559, P14423, P35248	710	57	20099	3.47648	1	0.142714	0.133344
GOTERM_BP_DIRECT	GO:1901224~positive regulation of non-canonical NF-kappaB signal transduction	8	1.1065	0.0153961	P62909, P08592, P97840, P46462, P63159	710	74	20099	3.06037	1	0.147238	0.13757
GOTERM_BP_DIRECT	GO:0010666~positive regulation of cardiac muscle cell apoptotic process	5	0.691563	0.0160344	P97571, P15473, Q07009, Q3T1J1, P01015	710	28	20099	5.05508	1	0.152554	0.142537
GOTERM_BP_DIRECT	GO:0010165~response to X-ray	5	0.691563	0.0160344	P06866, P07150, P05539, Q62935, P06399	710	28	20099	5.05508	1	0.152554	0.142537
GOTERM_BP_DIRECT	GO:0030593~neutrophil chemotaxis	7	0.968188	0.016122	P06765, P08721, Q63313, P10111, P50115, P24368	710	58	20099	3.41654	1	0.152994	0.142948
GOTERM_BP_DIRECT	GO:0034384~high-density lipoprotein particle clearance	3	0.414938	0.0169591	P02650, P04638, P14630	710	6	20099	14.1542	1	0.154595	0.144445
GOTERM_BP_DIRECT	GO:2000435~negative regulation of protein neddylation	3	0.414938	0.0169591	P62914, P09895	710	6	20099	14.1542	1	0.154595	0.144445
GOTERM_BP_DIRECT	GO:0034382~chylomicron remnant clearance	3	0.414938	0.0169591	P02650, P06759, P19939	710	6	20099	14.1542	1	0.154595	0.144445
GOTERM_BP_DIRECT	GO:0033034~positive regulation of myeloid cell apoptotic process	3	0.414938	0.0169591	P63159	710	6	20099	14.1542	1	0.154595	0.144445
GOTERM_BP_DIRECT	GO:0043371~negative regulation of CD4-positive, alpha-beta T cell differentiation	3	0.414938	0.0169591	P63159	710	6	20099	14.1542	1	0.154595	0.144445
GOTERM_BP_DIRECT	GO:0150111~regulation of transepithelial transport	3	0.414938	0.0169591	P63259, P60711	710	6	20099	14.1542	1	0.154595	0.144445
GOTERM_BP_DIRECT	GO:0051653~spindle localization	3	0.414938	0.0169591	Q4V7C7, Q5M7U6, P61589	710	6	20099	14.1542	1	0.154595	0.144445
GOTERM_BP_DIRECT	GO:1901841~regulation of high voltage-gated calcium channel activity	3	0.414938	0.0169591	P0DP30, P0DP31, P0DP29	710	6	20099	14.1542	1	0.154595	0.144445
GOTERM_BP_DIRECT	GO:0046038~GMP catabolic process	3	0.414938	0.0169591	Q9WTT6, P27605, P22985	710	6	20099	14.1542	1	0.154595	0.144445
GOTERM_BP_DIRECT	GO:0140238~presynaptic endocytosis	3	0.414938	0.0169591	P0DP30, P0DP31, P0DP29	710	6	20099	14.1542	1	0.154595	0.144445
GOTERM_BP_DIRECT	GO:0009609~response to symbiotic bacterium	3	0.414938	0.0169591	Q63515, Q63514, P04041	710	6	20099	14.1542	1	0.154595	0.144445
GOTERM_BP_DIRECT	GO:0035711~T-helper 1 cell activation	3	0.414938	0.0169591	P63159	710	6	20099	14.1542	1	0.154595	0.144445
GOTERM_BP_DIRECT	GO:0051106~positive regulation of DNA ligation	3	0.414938	0.0169591	P63159	710	6	20099	14.1542	1	0.154595	0.144445
GOTERM_BP_DIRECT	GO:0002906~negative regulation of mature B cell apoptotic process	3	0.414938	0.0169591	P26051, P30904	710	6	20099	14.1542	1	0.154595	0.144445
GOTERM_BP_DIRECT	GO:2000819~regulation of nucleotide-excision repair	3	0.414938	0.0169591	P63159	710	6	20099	14.1542	1	0.154595	0.144445
GOTERM_BP_DIRECT	GO:0001991~regulation of systemic arterial blood pressure by circulatory renin-angiotensin	3	0.414938	0.0169591	P25095, P29089, P01015	710	6	20099	14.1542	1	0.154595	0.144445
GOTERM_BP_DIRECT	GO:0051044~positive regulation of membrane protein ectodomain proteolysis	4	0.55325	0.0173672	P02650, P08592, Q8R2H5, Q80WY6	710	16	20099	7.07711	1	0.156009	0.145766
GOTERM_BP_DIRECT	GO:0043268~positive regulation of potassium ion transport	4	0.55325	0.0173672	Q9WUH4, P30904, P63159	710	16	20099	7.07711	1	0.156009	0.145766
GOTERM_BP_DIRECT	GO:0006590~thyroid hormone generation	4	0.55325	0.0173672	P00787, P07154, P06882, Q6IRK9	710	16	20099	7.07711	1	0.156009	0.145766
GOTERM_BP_DIRECT	GO:1902176~negative regulation of oxidative stress-induced intrinsic apoptotic signaling pathway	4	0.55325	0.0173672	P42930, O88767, P04041, P10111	710	16	20099	7.07711	1	0.156009	0.145766
GOTERM_BP_DIRECT	GO:0030194~positive regulation of blood coagulation	4	0.55325	0.0173672	Q8K3U6, P35704, P18292, D3ZTE0	710	16	20099	7.07711	1	0.156009	0.145766
GOTERM_BP_DIRECT	GO:0051014~actin filament severing	4	0.55325	0.0173672	P45592, Q7M0E3, Q68FP1	710	16	20099	7.07711	1	0.156009	0.145766
GOTERM_BP_DIRECT	GO:0050729~positive regulation of inflammatory response	9	1.24481	0.0179668	P17246, P08592, P80254, Q02765, Q99PP0, P11762, P50115, P70623, Q06000	710	94	20099	2.71038	1	0.161005	0.150434
GOTERM_BP_DIRECT	GO:1902430~negative regulation of amyloid-beta formation	5	0.691563	0.0180936	P02650, P05371, P08025, P13852, P35446	710	29	20099	4.88077	1	0.161749	0.151129
GOTERM_BP_DIRECT	GO:0042593~glucose homeostasis	12	1.65975	0.018224	P47858, P24594, P50463, Q6P6V0, O88767, Q9WVT0, Q99PP0, P55053, P04916, P20156, P70668, P62755	710	151	20099	2.24968	1	0.162523	0.151852
GOTERM_BP_DIRECT	GO:0032880~regulation of protein localization	10	1.38313	0.0185734	P63245, Q62658, Q9R0T4, P34058, P61983, Q6P6Q2, P82995, Q9Z1Y3, Q5XI73, P13852	710	113	20099	2.50517	1	0.164934	0.154105
GOTERM_BP_DIRECT	GO:0033189~response to vitamin A	6	0.829876	0.0187916	Q99MH3, P06759, P26051, P22355, P35577, P04762	710	44	20099	3.86024	1	0.164934	0.154105
GOTERM_BP_DIRECT	GO:0043537~negative regulation of blood vessel endothelial cell migration	6	0.829876	0.0187916	P02650, P17246, Q99PS8, P63159	710	44	20099	3.86024	1	0.164934	0.154105
GOTERM_BP_DIRECT	GO:0009408~response to heat	6	0.829876	0.0187916	P42930, P23928, P08025, P82995, P00564, P07632	710	44	20099	3.86024	1	0.164934	0.154105
GOTERM_BP_DIRECT	GO:0051496~positive regulation of stress fiber assembly	7	0.968188	0.0188063	P61589, P04639, Q9R1E9, Q9EPC6, P04692, P62963, Q6RUV5	710	60	20099	3.30265	1	0.164934	0.154105
GOTERM_BP_DIRECT	GO:0071392~cellular response to estradiol stimulus	7	0.968188	0.0188063	P15473, P0C0S7, P08025, P33436, Q64610	710	60	20099	3.30265	1	0.164934	0.154105
GOTERM_BP_DIRECT	GO:0001975~response to amphetamine	7	0.968188	0.0188063	P0DP30, P0DP31, P27605, P0DP29, P01179, P47942, P07632	710	60	20099	3.30265	1	0.164934	0.154105
GOTERM_BP_DIRECT	GO:0042981~regulation of apoptotic process	13	1.79806	0.0199131	P02650, P62909, P35704, Q9EST6, P19804, P30836, P05371, P82995, P16636, P01015, Q6AXS5, P49911	710	173	20099	2.12722	1	0.174228	0.162788
GOTERM_BP_DIRECT	GO:0001937~negative regulation of endothelial cell proliferation	6	0.829876	0.0205456	P02650, O70367, P05545, P22985, P16975, P26644	710	45	20099	3.77446	1	0.177668	0.166002
GOTERM_BP_DIRECT	GO:0035988~chondrocyte proliferation	4	0.55325	0.0205463	P35444, Q9R1E9, Q10739, P23785	710	17	20099	6.66081	1	0.177668	0.166002
GOTERM_BP_DIRECT	GO:0034145~positive regulation of toll-like receptor 4 signaling pathway	4	0.55325	0.0205463	P63159, Q63313	710	17	20099	6.66081	1	0.177668	0.166002
GOTERM_BP_DIRECT	GO:0051258~protein polymerization	4	0.55325	0.0205463	P02680, P48199, P14480, P06399	710	17	20099	6.66081	1	0.177668	0.166002
GOTERM_BP_DIRECT	GO:0034695~response to prostaglandin E	4	0.55325	0.0205463	P06238, P26342, P35577, P01179	710	17	20099	6.66081	1	0.177668	0.166002
GOTERM_BP_DIRECT	GO:0071549~cellular response to dexamethasone stimulus	8	1.1065	0.0213647	P17246, P35859, P25095, P29089, P58751, P08025, Q99372, P19356	710	79	20099	2.86668	1	0.184314	0.172213
GOTERM_BP_DIRECT	GO:0070371~ERK1 and ERK2 cascade	7	0.968188	0.0217806	P01186, P04764, P63102, P97840, P12346, P01015	710	62	20099	3.19612	1	0.187465	0.175157
GOTERM_BP_DIRECT	GO:0098609~cell-cell adhesion	14	1.93638	0.022009	P29534, Q62812, P49134, Q9R0T4, Q9QYV0, P97603, Q63198, Q3SWT0, P11762, Q9ET61, P38983, P01039, Q9Z1Y3	710	196	20099	2.02203	1	0.188991	0.176582
GOTERM_BP_DIRECT	GO:0070542~response to fatty acid	6	0.829876	0.0224031	P55159, P06759, P58751, Q9R1E9, P06214, P04762	710	46	20099	3.69241	1	0.189902	0.177433
GOTERM_BP_DIRECT	GO:1905564~positive regulation of vascular endothelial cell proliferation	5	0.691563	0.0226854	P08025, P01346, P63159	710	31	20099	4.56588	1	0.189902	0.177433
GOTERM_BP_DIRECT	GO:0043524~negative regulation of neuron apoptotic process	15	2.07469	0.0229796	P02650, P50475, P35704, Q91ZN1, P34058, Q7M767, Q6P6V0, P48508, O08775, O88767, P05371, Q9Z0V6, P01015, P07632, P23785	710	218	20099	1.94783	1	0.189902	0.177433
GOTERM_BP_DIRECT	GO:0072318~clathrin coat disassembly	3	0.414938	0.0231925	P63018, P11442	710	7	20099	12.1322	1	0.189902	0.177433
GOTERM_BP_DIRECT	GO:1905323~telomerase holoenzyme complex assembly	3	0.414938	0.0231925	P34058, P82995, P83868	710	7	20099	12.1322	1	0.189902	0.177433
GOTERM_BP_DIRECT	GO:0000413~protein peptidyl-prolyl isomerization	3	0.414938	0.0231925	Q62658, P10111, P24368	710	7	20099	12.1322	1	0.189902	0.177433
GOTERM_BP_DIRECT	GO:0050819~negative regulation of coagulation	3	0.414938	0.0231925	P31394, P53813, P14668	710	7	20099	12.1322	1	0.189902	0.177433
GOTERM_BP_DIRECT	GO:0034418~urate biosynthetic process	3	0.414938	0.0231925	P85973, P08721	710	7	20099	12.1322	1	0.189902	0.177433
GOTERM_BP_DIRECT	GO:0051293~establishment of spindle localization	3	0.414938	0.0231925	P38650, P45592	710	7	20099	12.1322	1	0.189902	0.177433
GOTERM_BP_DIRECT	GO:0098901~regulation of cardiac muscle cell action potential	3	0.414938	0.0231925	P0DP30, P0DP31, P0DP29	710	7	20099	12.1322	1	0.189902	0.177433
GOTERM_BP_DIRECT	GO:0020027~hemoglobin metabolic process	3	0.414938	0.0231925	Q64240, P20059, P04762	710	7	20099	12.1322	1	0.189902	0.177433
GOTERM_BP_DIRECT	GO:0003081~regulation of systemic arterial blood pressure by renin-angiotensin	3	0.414938	0.0231925	P25095, P47820, P01015	710	7	20099	12.1322	1	0.189902	0.177433
GOTERM_BP_DIRECT	GO:0010815~bradykinin catabolic process	3	0.414938	0.0231925	P47820, Q9EQV8, O54975	710	7	20099	12.1322	1	0.189902	0.177433
GOTERM_BP_DIRECT	GO:0042159~lipoprotein catabolic process	3	0.414938	0.0231925	P02650, Q7TMA5, P24268	710	7	20099	12.1322	1	0.189902	0.177433
GOTERM_BP_DIRECT	GO:0045901~positive regulation of translational elongation	3	0.414938	0.0231925	Q3T1J1, P23358	710	7	20099	12.1322	1	0.189902	0.177433
GOTERM_BP_DIRECT	GO:0043462~regulation of ATP-dependent activity	3	0.414938	0.0231925	P09739, P58775, P04692	710	7	20099	12.1322	1	0.189902	0.177433
GOTERM_BP_DIRECT	GO:0071896~protein localization to adherens junction	3	0.414938	0.0231925	P63259, P60711	710	7	20099	12.1322	1	0.189902	0.177433
GOTERM_BP_DIRECT	GO:0010544~negative regulation of platelet activation	3	0.414938	0.0231925	P02650, P28576, O08770	710	7	20099	12.1322	1	0.189902	0.177433
GOTERM_BP_DIRECT	GO:0042866~pyruvate biosynthetic process	3	0.414938	0.0231925	P12928, P11980	710	7	20099	12.1322	1	0.189902	0.177433
GOTERM_BP_DIRECT	GO:0008211~glucocorticoid metabolic process	3	0.414938	0.0231925	P47727, P04639, P31211	710	7	20099	12.1322	1	0.189902	0.177433
GOTERM_BP_DIRECT	GO:0046903~secretion	3	0.414938	0.0231925	Q9WVH8, P48037, P27139	710	7	20099	12.1322	1	0.189902	0.177433
GOTERM_BP_DIRECT	GO:0006783~heme biosynthetic process	4	0.55325	0.0240226	Q3B7D0, P32362, P19356, P06214	710	18	20099	6.29077	1	0.194546	0.181773
GOTERM_BP_DIRECT	GO:0006656~phosphatidylcholine biosynthetic process	4	0.55325	0.0240226	P04638, P04639, P55053, P18424	710	18	20099	6.29077	1	0.194546	0.181773
GOTERM_BP_DIRECT	GO:0016322~neuron remodeling	4	0.55325	0.0240226	Q00657, P08592, P01026, P31720	710	18	20099	6.29077	1	0.194546	0.181773
GOTERM_BP_DIRECT	GO:1902230~negative regulation of intrinsic apoptotic signaling pathway in response to DNA damage	4	0.55325	0.0240226	P05371, P63029	710	18	20099	6.29077	1	0.194546	0.181773
GOTERM_BP_DIRECT	GO:0061635~regulation of protein complex stability	4	0.55325	0.0240226	P34058, P82995, P63018	710	18	20099	6.29077	1	0.194546	0.181773
GOTERM_BP_DIRECT	GO:0032436~positive regulation of proteasomal ubiquitin-dependent protein catabolic process	8	1.1065	0.0241481	Q99MH3, P61959, P63245, Q7M767, P46462, P05371, O88797, P12346	710	81	20099	2.7959	1	0.195136	0.182324
GOTERM_BP_DIRECT	GO:0034605~cellular response to heat	7	0.968188	0.025057	P62260, Q68FR9, P46462, P34058, P82995, P63018	710	64	20099	3.09624	1	0.201189	0.187979
GOTERM_BP_DIRECT	GO:0045445~myoblast differentiation	5	0.691563	0.0252234	P49134, P08025, P04041, Q01177, P11762	710	32	20099	4.4232	1	0.201189	0.187979
GOTERM_BP_DIRECT	GO:0006730~one-carbon metabolic process	5	0.691563	0.0252234	P27653, P14141, P27139, B0BNN3, P10760	710	32	20099	4.4232	1	0.201189	0.187979
GOTERM_BP_DIRECT	GO:0098974~postsynaptic actin cytoskeleton organization	5	0.691563	0.0252234	Q4V7C7, P63259, P60711, Q6RUV5	710	32	20099	4.4232	1	0.201189	0.187979
GOTERM_BP_DIRECT	GO:1902042~negative regulation of extrinsic apoptotic signaling pathway via death domain receptors	5	0.691563	0.0252234	Q62764, P02680, P14480, P04041, P06399	710	32	20099	4.4232	1	0.201189	0.187979
GOTERM_BP_DIRECT	GO:0003009~skeletal muscle contraction	5	0.691563	0.0252234	P09739, P12847, P27768, P05197, P82995	710	32	20099	4.4232	1	0.201189	0.187979
GOTERM_BP_DIRECT	GO:1904706~negative regulation of vascular associated smooth muscle cell proliferation	6	0.829876	0.0264364	P48032, O88767, P61589, P04692, P04906, P01015	710	48	20099	3.53856	1	0.210411	0.196596
GOTERM_BP_DIRECT	GO:2001235~positive regulation of apoptotic signaling pathway	7	0.968188	0.0268119	P62909, Q02765, P07154, Q9R1E9, Q63088, Q9QZE3	710	65	20099	3.0486	1	0.212942	0.198961
GOTERM_BP_DIRECT	GO:0009617~response to bacterium	15	2.07469	0.02721	P09527, P06866, P28077, Q8CIZ5, P50503, P12346, P32038, P70623, Q06000, P01946, P14141, P01026, P00684, P09006	710	223	20099	1.90416	1	0.215641	0.201482
GOTERM_BP_DIRECT	GO:0001501~skeletal system development	10	1.38313	0.0275344	P03994, P63174, P05539, P35444, P13941, Q10739, P02466, P02454, P07897	710	121	20099	2.33954	1	0.217746	0.203449
GOTERM_BP_DIRECT	GO:0071639~positive regulation of monocyte chemotactic protein-1 production	4	0.55325	0.0277959	P97840, P63159	710	19	20099	5.95967	1	0.218043	0.203726
GOTERM_BP_DIRECT	GO:0010812~negative regulation of cell-substrate adhesion	4	0.55325	0.0277959	P61589, Q01177, P02454, P11762	710	19	20099	5.95967	1	0.218043	0.203726
GOTERM_BP_DIRECT	GO:0007159~leukocyte cell-cell adhesion	5	0.691563	0.0279255	P29534, O35763, P49134, Q3SWT0, P02651	710	33	20099	4.28916	1	0.218043	0.203726
GOTERM_BP_DIRECT	GO:1900273~positive regulation of long-term synaptic potentiation	5	0.691563	0.0279255	P08592, P61980, P58751, P97546	710	33	20099	4.28916	1	0.218043	0.203726
GOTERM_BP_DIRECT	GO:0009409~response to cold	5	0.691563	0.0279255	Q9QXU9, Q925G0, P82995, P01015, P20156	710	33	20099	4.28916	1	0.218043	0.203726
GOTERM_BP_DIRECT	GO:0045777~positive regulation of blood pressure	5	0.691563	0.0279255	P25095, P29089, P47820, P01015, P01179	710	33	20099	4.28916	1	0.218043	0.203726
GOTERM_BP_DIRECT	GO:0006629~lipid metabolic process	14	1.93638	0.0282834	P02650, P07943, P23593, P16638, P25093, P18424, P54316, P47727, Q7TMA5, P17164, P55053, P04041, Q02759, P10719	710	203	20099	1.95231	1	0.220373	0.205904
GOTERM_BP_DIRECT	GO:0030282~bone mineralization	7	0.968188	0.0286464	O70534, P35444, P16636, P08721, Q02759, P02466	710	66	20099	3.00241	1	0.222265	0.207671
GOTERM_BP_DIRECT	GO:0001541~ovarian follicle development	7	0.968188	0.0286464	O08775, P61980, Q10739, P33436, P20156, P07632	710	66	20099	3.00241	1	0.222265	0.207671
GOTERM_BP_DIRECT	GO:0001938~positive regulation of endothelial cell proliferation	8	1.1065	0.0287746	P08934, P08932, O08775, P12346, P49744, P01048, Q91ZT1, Q62894	710	84	20099	2.69604	1	0.222792	0.208164
GOTERM_BP_DIRECT	GO:0032489~regulation of Cdc42 protein signal transduction	3	0.414938	0.030209	P02650, P06759, P04639	710	8	20099	10.6157	1	0.230999	0.215832
GOTERM_BP_DIRECT	GO:0051354~negative regulation of oxidoreductase activity	3	0.414938	0.030209	Q9R063, P06866, P23562	710	8	20099	10.6157	1	0.230999	0.215832
GOTERM_BP_DIRECT	GO:0032232~negative regulation of actin filament bundle assembly	3	0.414938	0.030209	P45592, P62963	710	8	20099	10.6157	1	0.230999	0.215832
GOTERM_BP_DIRECT	GO:0097068~response to thyroxine	3	0.414938	0.030209	Q8K3U6, P18292, P11232	710	8	20099	10.6157	1	0.230999	0.215832
GOTERM_BP_DIRECT	GO:0043297~apical junction assembly	3	0.414938	0.030209	P85972, P61589, Q5RKI0	710	8	20099	10.6157	1	0.230999	0.215832
GOTERM_BP_DIRECT	GO:0048642~negative regulation of skeletal muscle tissue development	3	0.414938	0.030209	P17246, Q62764, Q5U349	710	8	20099	10.6157	1	0.230999	0.215832
GOTERM_BP_DIRECT	GO:0017148~negative regulation of translation	9	1.24481	0.0307527	P04797, P63245, P24594, P62909, P35427, P62961, Q6AXS5	710	104	20099	2.44977	1	0.234017	0.218652
GOTERM_BP_DIRECT	GO:0032956~regulation of actin cytoskeleton organization	9	1.24481	0.0307527	P17246, Q99PS8, Q4V7C7, P14925, Q91ZN1, P61589, Q00495, P85845, Q6RUV5	710	104	20099	2.44977	1	0.234017	0.218652
GOTERM_BP_DIRECT	GO:0001894~tissue homeostasis	5	0.691563	0.0307934	P07943, P05539, P49134, Q9R1E9, P13941	710	34	20099	4.16301	1	0.234017	0.218652
GOTERM_BP_DIRECT	GO:0090398~cellular senescence	6	0.829876	0.0309051	A9UMV8, P30904, P35444, P48679	710	50	20099	3.39701	1	0.234385	0.218996
GOTERM_BP_DIRECT	GO:0051593~response to folic acid	4	0.55325	0.0318649	P48032, Q68FP1, P04041, P05197	710	20	20099	5.66169	1	0.240678	0.224875
GOTERM_BP_DIRECT	GO:0002281~macrophage activation involved in immune response	4	0.55325	0.0318649	P63159, Q63313	710	20	20099	5.66169	1	0.240678	0.224875
GOTERM_BP_DIRECT	GO:0042098~T cell proliferation	7	0.968188	0.0325586	P17246, P35704, O35763, Q62658, Q91ZN1, P17559, Q4KM35	710	68	20099	2.91411	1	0.245416	0.229302
GOTERM_BP_DIRECT	GO:0006605~protein targeting	6	0.829876	0.0333064	P63102, P62914, P62260, P68255, P35213, P61983	710	51	20099	3.33041	1	0.250035	0.233618
GOTERM_BP_DIRECT	GO:0032722~positive regulation of chemokine production	6	0.829876	0.0333064	P08592, P97840, P08650, Q00495, Q63313, Q06000	710	51	20099	3.33041	1	0.250035	0.233618
GOTERM_BP_DIRECT	GO:0032008~positive regulation of TOR signaling	5	0.691563	0.0338283	Q8K3U6, Q63207, O08775, P58751, P12346	710	35	20099	4.04406	1	0.251402	0.234896
GOTERM_BP_DIRECT	GO:0051491~positive regulation of filopodium assembly	5	0.691563	0.0338283	Q62952, Q4V7C7, P25304, P85845, Q6RUV5	710	35	20099	4.04406	1	0.251402	0.234896
GOTERM_BP_DIRECT	GO:0035987~endodermal cell differentiation	5	0.691563	0.0338283	Q62812, P04937, Q10739, P33436, P20909	710	35	20099	4.04406	1	0.251402	0.234896
GOTERM_BP_DIRECT	GO:0006911~phagocytosis, engulfment	5	0.691563	0.0338283	Q62812, P20759, P97710, Q68FP1, Q6RUV5	710	35	20099	4.04406	1	0.251402	0.234896
GOTERM_BP_DIRECT	GO:0071480~cellular response to gamma radiation	5	0.691563	0.0338283	P23928, A9UMV8, P35427, P06761	710	35	20099	4.04406	1	0.251402	0.234896
GOTERM_BP_DIRECT	GO:0071363~cellular response to growth factor stimulus	9	1.24481	0.0339074	P02650, P17246, P63245, P05371, P16975, P07897, P62963, P04762, Q80WY6	710	106	20099	2.40355	1	0.251486	0.234974
GOTERM_BP_DIRECT	GO:0001933~negative regulation of protein phosphorylation	9	1.24481	0.0355642	P17246, P15473, O88767, P97710, O88600, P31044, P22985, P13852, P10111	710	107	20099	2.38108	1	0.263246	0.245962
GOTERM_BP_DIRECT	GO:0071498~cellular response to fluid shear stress	4	0.55325	0.0362271	P08721, P27139, P33436	710	21	20099	5.39209	1	0.267618	0.250047
GOTERM_BP_DIRECT	GO:0051085~chaperone cofactor-dependent protein refolding	5	0.691563	0.0370311	P50503, P06761, P63018, P83868	710	36	20099	3.93173	1	0.271638	0.253803
GOTERM_BP_DIRECT	GO:0002752~cell surface pattern recognition receptor signaling pathway	3	0.414938	0.0379456	P08661, Q9WTS8, Q63313	710	9	20099	9.43615	1	0.271638	0.253803
GOTERM_BP_DIRECT	GO:0034329~cell junction assembly	3	0.414938	0.0379456	P61589, B2GUZ5	710	9	20099	9.43615	1	0.271638	0.253803
GOTERM_BP_DIRECT	GO:0006108~malate metabolic process	3	0.414938	0.0379456	P04636, O88989, P13697	710	9	20099	9.43615	1	0.271638	0.253803
GOTERM_BP_DIRECT	GO:0044788~modulation by host of viral process	3	0.414938	0.0379456	P63018, P12785	710	9	20099	9.43615	1	0.271638	0.253803
GOTERM_BP_DIRECT	GO:0051006~positive regulation of lipoprotein lipase activity	3	0.414938	0.0379456	Q9QUH3, P02651, P26644	710	9	20099	9.43615	1	0.271638	0.253803
GOTERM_BP_DIRECT	GO:0010593~negative regulation of lamellipodium assembly	3	0.414938	0.0379456	Q99PS8, P45592	710	9	20099	9.43615	1	0.271638	0.253803
GOTERM_BP_DIRECT	GO:1905460~negative regulation of vascular associated smooth muscle cell apoptotic process	3	0.414938	0.0379456	P04797, P08025	710	9	20099	9.43615	1	0.271638	0.253803
GOTERM_BP_DIRECT	GO:0034137~positive regulation of toll-like receptor 2 signaling pathway	3	0.414938	0.0379456	P63159	710	9	20099	9.43615	1	0.271638	0.253803
GOTERM_BP_DIRECT	GO:0016240~autophagosome membrane docking	3	0.414938	0.0379456	P0DP30, P0DP31, P0DP29	710	9	20099	9.43615	1	0.271638	0.253803
GOTERM_BP_DIRECT	GO:0007000~nucleolus organization	3	0.414938	0.0379456	P17074	710	9	20099	9.43615	1	0.271638	0.253803
GOTERM_BP_DIRECT	GO:0001738~morphogenesis of a polarized epithelium	3	0.414938	0.0379456	P63259, P60711	710	9	20099	9.43615	1	0.271638	0.253803
GOTERM_BP_DIRECT	GO:0045819~positive regulation of glycogen catabolic process	3	0.414938	0.0379456	P63159	710	9	20099	9.43615	1	0.271638	0.253803
GOTERM_BP_DIRECT	GO:0010756~positive regulation of plasminogen activation	3	0.414938	0.0379456	P04764, Q07936, D3ZTE0	710	9	20099	9.43615	1	0.271638	0.253803
GOTERM_BP_DIRECT	GO:0051122~hepoxilin biosynthetic process	3	0.414938	0.0379456	P08010, P14942, P04906, Q02759	710	9	20099	9.43615	1	0.271638	0.253803
GOTERM_BP_DIRECT	GO:0019563~glycerol catabolic process	3	0.414938	0.0379456	P48500	710	9	20099	9.43615	1	0.271638	0.253803
GOTERM_BP_DIRECT	GO:0042327~positive regulation of phosphorylation	5	0.691563	0.0404022	P12346, P30904, P83868	710	37	20099	3.82547	1	0.288109	0.269192
GOTERM_BP_DIRECT	GO:0043407~negative regulation of MAP kinase activity	5	0.691563	0.0404022	P02650, Q00981, P04906, P01015, P01048	710	37	20099	3.82547	1	0.288109	0.269192
GOTERM_BP_DIRECT	GO:1990000~amyloid fibril formation	4	0.55325	0.0408789	P08592, Q62658, P07151, Q68FP1	710	22	20099	5.14699	1	0.288727	0.269769
GOTERM_BP_DIRECT	GO:0002063~chondrocyte development	4	0.55325	0.0408789	P35444, P20909, P07897, Q62894	710	22	20099	5.14699	1	0.288727	0.269769
GOTERM_BP_DIRECT	GO:0051146~striated muscle cell differentiation	4	0.55325	0.0408789	P24594, P01346, Q9Z1Y3, P62775	710	22	20099	5.14699	1	0.288727	0.269769
GOTERM_BP_DIRECT	GO:0007019~microtubule depolymerization	4	0.55325	0.0408789	P13668, P61589, Q9R1E9	710	22	20099	5.14699	1	0.288727	0.269769
GOTERM_BP_DIRECT	GO:2000406~positive regulation of T cell migration	4	0.55325	0.0408789	P08592, P97840, Q91ZN1, P61589	710	22	20099	5.14699	1	0.288727	0.269769
GOTERM_BP_DIRECT	GO:0030838~positive regulation of actin filament polymerization	6	0.829876	0.0411913	Q4V7C7, P61589, Q9EPC6, Q02759, P62963, Q6RUV5	710	54	20099	3.14538	1	0.290379	0.271313
GOTERM_BP_DIRECT	GO:0051216~cartilage development	8	1.1065	0.0418051	O70367, P08494, P26051, P05539, P35444, P13941, P20909, P51886	710	91	20099	2.48866	1	0.294146	0.274833
GOTERM_BP_DIRECT	GO:0006915~apoptotic process	26	3.59613	0.0424769	Q4FZU4, P04797, Q62764, P62909, P30009, P62839, P35444, P12346, Q9QW30, Q63088, P59996, P11762, P10111, P50115, P63245, P15473, P61078, Q02765, P07154, P04041, Q9QZE3, P02773, P07632	710	490	20099	1.50208	1	0.298306	0.27872
GOTERM_BP_DIRECT	GO:0001935~endothelial cell proliferation	5	0.691563	0.0439419	P04639, P63159, Q10739	710	38	20099	3.7248	1	0.30801	0.287786
GOTERM_BP_DIRECT	GO:0008584~male gonad development	12	1.65975	0.044743	P28576, Q62764, O08775, P61980, P07154, P47820, P24090, P04916, Q9QYV0, Q10739, P14841	710	174	20099	1.95231	1	0.310155	0.289791
GOTERM_BP_DIRECT	GO:0001502~cartilage condensation	4	0.55325	0.0458159	P05539, Q9R1E9, P20909, P07897	710	23	20099	4.92321	1	0.310155	0.289791
GOTERM_BP_DIRECT	GO:0031589~cell-substrate adhesion	4	0.55325	0.0458159	P30009, P49134, Q62935, Q91ZN1	710	23	20099	4.92321	1	0.310155	0.289791
GOTERM_BP_DIRECT	GO:1903427~negative regulation of reactive oxygen species biosynthetic process	4	0.55325	0.0458159	P62630, O88767, P61589, P63159, P62632	710	23	20099	4.92321	1	0.310155	0.289791
GOTERM_BP_DIRECT	GO:0090190~positive regulation of branching involved in ureteric bud morphogenesis	4	0.55325	0.0458159	P17246, P25095, P29089, P01015	710	23	20099	4.92321	1	0.310155	0.289791
GOTERM_BP_DIRECT	GO:0050765~negative regulation of phagocytosis	4	0.55325	0.0458159	P17246, P63245, P97710, P35248	710	23	20099	4.92321	1	0.310155	0.289791
GOTERM_BP_DIRECT	GO:0050830~defense response to Gram-positive bacterium	10	1.38313	0.0460882	P19999, P08592, Q8CIZ5, O55004, P00697, P08661, P00684, P14423, Q63313, P10354	710	133	20099	2.12845	1	0.310155	0.289791
GOTERM_BP_DIRECT	GO:0099150~regulation of postsynaptic specialization assembly	3	0.414938	0.046343	P62630, P62632	710	10	20099	8.49254	1	0.310155	0.289791
GOTERM_BP_DIRECT	GO:0006000~fructose metabolic process	3	0.414938	0.046343	P05065, P00884	710	10	20099	8.49254	1	0.310155	0.289791
GOTERM_BP_DIRECT	GO:0061448~connective tissue development	3	0.414938	0.046343	P17246, Q9R1E9, P16636	710	10	20099	8.49254	1	0.310155	0.289791
GOTERM_BP_DIRECT	GO:0051248~negative regulation of protein metabolic process	3	0.414938	0.046343	P02650, P30904	710	10	20099	8.49254	1	0.310155	0.289791
GOTERM_BP_DIRECT	GO:0071281~cellular response to iron ion	3	0.414938	0.046343	P07151, P12346	710	10	20099	8.49254	1	0.310155	0.289791
GOTERM_BP_DIRECT	GO:0050672~negative regulation of lymphocyte proliferation	3	0.414938	0.046343	P08934, P08932, P01048	710	10	20099	8.49254	1	0.310155	0.289791
GOTERM_BP_DIRECT	GO:0043490~malate-aspartate shuttle	3	0.414938	0.046343	P13221, P04636, O88989	710	10	20099	8.49254	1	0.310155	0.289791
GOTERM_BP_DIRECT	GO:0071288~cellular response to mercury ion	3	0.414938	0.046343	P61078, P62839, P04937	710	10	20099	8.49254	1	0.310155	0.289791
GOTERM_BP_DIRECT	GO:1990456~mitochondrion-endoplasmic reticulum membrane tethering	3	0.414938	0.046343	P0DP30, P0DP31, P0DP29	710	10	20099	8.49254	1	0.310155	0.289791
GOTERM_BP_DIRECT	GO:0090277~positive regulation of peptide hormone secretion	3	0.414938	0.046343	P02680, P14480, P06399	710	10	20099	8.49254	1	0.310155	0.289791
GOTERM_BP_DIRECT	GO:0044829~positive regulation by host of viral genome replication	3	0.414938	0.046343	P63018, P24368	710	10	20099	8.49254	1	0.310155	0.289791
GOTERM_BP_DIRECT	GO:0060452~positive regulation of cardiac muscle contraction	3	0.414938	0.046343	Q9R1E9, P82995, P10354	710	10	20099	8.49254	1	0.310155	0.289791
GOTERM_BP_DIRECT	GO:0098880~maintenance of postsynaptic specialization structure	3	0.414938	0.046343	P49134, P63018	710	10	20099	8.49254	1	0.310155	0.289791
GOTERM_BP_DIRECT	GO:0034165~positive regulation of toll-like receptor 9 signaling pathway	3	0.414938	0.046343	P63159	710	10	20099	8.49254	1	0.310155	0.289791
GOTERM_BP_DIRECT	GO:0003416~endochondral bone growth	3	0.414938	0.046343	O08775, P35444, Q62894	710	10	20099	8.49254	1	0.310155	0.289791
GOTERM_BP_DIRECT	GO:0022898~regulation of transmembrane transporter activity	3	0.414938	0.046343	P63259, P60711	710	10	20099	8.49254	1	0.310155	0.289791
GOTERM_BP_DIRECT	GO:0090129~positive regulation of synapse maturation	3	0.414938	0.046343	P61980, P58751	710	10	20099	8.49254	1	0.310155	0.289791
GOTERM_BP_DIRECT	GO:0001731~formation of translation preinitiation complex	3	0.414938	0.046343	P81795, P27952	710	10	20099	8.49254	1	0.310155	0.289791
GOTERM_BP_DIRECT	GO:0034599~cellular response to oxidative stress	9	1.24481	0.0466551	P35704, Q9R063, P19804, O88767, P05370, Q9Z0V6, P14841, P10111, P07632	710	113	20099	2.25466	1	0.311526	0.291071
GOTERM_BP_DIRECT	GO:0071222~cellular response to lipopolysaccharide	18	2.48963	0.0467162	Q32PX7, P06765, Q62935, P97710, P04937, P04906, P31000, Q63313, Q80WY6, Q99MH3, Q02445, Q07009, O88767, P07151, P61589, P63159	710	308	20099	1.65439	1	0.311526	0.291071
GOTERM_BP_DIRECT	GO:0050714~positive regulation of protein secretion	6	0.829876	0.0470233	P17246, P02680, P14480, P08025, P06399, P10111	710	56	20099	3.03305	1	0.312448	0.291933
GOTERM_BP_DIRECT	GO:0048012~hepatocyte growth factor receptor signaling pathway	6	0.829876	0.0470233	O08775, P13668, Q00495, Q91ZT1, Q6RUV5	710	56	20099	3.03305	1	0.312448	0.291933
GOTERM_BP_DIRECT	GO:0046697~decidualization	5	0.691563	0.04765	Q5PPN5, Q9R0T4, P00787, P07154, P31000	710	39	20099	3.62929	1	0.314354	0.293714
GOTERM_BP_DIRECT	GO:1903672~positive regulation of sprouting angiogenesis	5	0.691563	0.04765	P63159, P11980	710	39	20099	3.62929	1	0.314354	0.293714
GOTERM_BP_DIRECT	GO:0002053~positive regulation of mesenchymal cell proliferation	5	0.691563	0.04765	P28576, O08775, P63159	710	39	20099	3.62929	1	0.314354	0.293714
GOTERM_BP_DIRECT	GO:0006284~base-excision repair	5	0.691563	0.04765	P62909, P63159	710	39	20099	3.62929	1	0.314354	0.293714
GOTERM_BP_DIRECT	GO:0048839~inner ear development	7	0.968188	0.0489042	P28576, P31721, P17246, Q9EST6, P05539, P08025, P16975	710	75	20099	2.64212	1	0.322054	0.300909
GOTERM_BP_DIRECT	GO:0043277~apoptotic cell clearance	4	0.55325	0.051033	P63159, Q02759	710	24	20099	4.71808	1	0.334289	0.31234
GOTERM_BP_DIRECT	GO:0055117~regulation of cardiac muscle contraction	4	0.55325	0.051033	P0DP30, P0DP31, P25304, P0DP29	710	24	20099	4.71808	1	0.334289	0.31234
GOTERM_BP_DIRECT	GO:0060047~heart contraction	4	0.55325	0.051033	P62738, P68035, P04041, P47820, P07632	710	24	20099	4.71808	1	0.334289	0.31234
GOTERM_BP_DIRECT	GO:0030833~regulation of actin filament polymerization	5	0.691563	0.0515259	Q91ZN1, Q9EPC6, Q99372, B0BNA5, P62963	710	40	20099	3.53856	1	0.335735	0.313691
GOTERM_BP_DIRECT	GO:0099560~synaptic membrane adhesion	5	0.691563	0.0515259	P24054, Q64604, Q64605, Q9Z1Y3, Q63621	710	40	20099	3.53856	1	0.335735	0.313691
GOTERM_BP_DIRECT	GO:0060135~maternal process involved in female pregnancy	5	0.691563	0.0515259	P07943, P97840, P49134, P14925, O88767	710	40	20099	3.53856	1	0.335735	0.313691
GOTERM_BP_DIRECT	GO:0000278~mitotic cell cycle	9	1.24481	0.0529627	P08592, P69897, Q6P9T8, Q3KRE8, Q5XIF6, P68370, P85108, P11442, P62755	710	116	20099	2.19635	1	0.34449	0.321872
GOTERM_BP_DIRECT	GO:0045429~positive regulation of nitric oxide biosynthetic process	6	0.829876	0.0533204	P02650, P08592, P48199, P05371, P82995, P01015	710	58	20099	2.92846	1	0.345602	0.32291
GOTERM_BP_DIRECT	GO:0000281~mitotic cytokinesis	6	0.829876	0.0533204	P45592, P13668, P61589, P37996	710	58	20099	2.92846	1	0.345602	0.32291
GOTERM_BP_DIRECT	GO:0045766~positive regulation of angiogenesis	12	1.65975	0.0546206	P42930, O08775, P25095, P49134, P12346, O88600, P08650, P01346, Q811M5, P01026, P23785, Q62894	710	180	20099	1.88723	1	0.353159	0.329971
GOTERM_BP_DIRECT	GO:0045428~regulation of nitric oxide biosynthetic process	3	0.414938	0.0553451	P97710, P08025, Q6RUV5	710	11	20099	7.72049	1	0.353159	0.329971
GOTERM_BP_DIRECT	GO:0008088~axo-dendritic transport	3	0.414938	0.0553451	P08592, P63018	710	11	20099	7.72049	1	0.353159	0.329971
GOTERM_BP_DIRECT	GO:0010898~positive regulation of triglyceride catabolic process	3	0.414938	0.0553451	Q9QUH3, P02651, P26644	710	11	20099	7.72049	1	0.353159	0.329971
GOTERM_BP_DIRECT	GO:0060351~cartilage development involved in endochondral bone morphogenesis	3	0.414938	0.0553451	P16310, P05539, P02454	710	11	20099	7.72049	1	0.353159	0.329971
GOTERM_BP_DIRECT	GO:0010193~response to ozone	3	0.414938	0.0553451	P04937, P17559, P04762	710	11	20099	7.72049	1	0.353159	0.329971
GOTERM_BP_DIRECT	GO:0001773~myeloid dendritic cell activation	3	0.414938	0.0553451	P63159	710	11	20099	7.72049	1	0.353159	0.329971
GOTERM_BP_DIRECT	GO:0000255~allantoin metabolic process	3	0.414938	0.0553451	Q9WTT6, P85973, P22985	710	11	20099	7.72049	1	0.353159	0.329971
GOTERM_BP_DIRECT	GO:0006089~lactate metabolic process	3	0.414938	0.0553451	P04642, P42123	710	11	20099	7.72049	1	0.353159	0.329971
GOTERM_BP_DIRECT	GO:0032094~response to food	5	0.691563	0.0555688	P07338, P16310, P05370, P01179, P02651	710	41	20099	3.45225	1	0.353368	0.330166
GOTERM_BP_DIRECT	GO:0045931~positive regulation of mitotic cell cycle	5	0.691563	0.0555688	P08592, P63159, Q5U349	710	41	20099	3.45225	1	0.353368	0.330166
GOTERM_BP_DIRECT	GO:0032781~positive regulation of ATP-dependent activity	4	0.55325	0.0565242	Q9EPC6, P00884, P04692, P62963	710	25	20099	4.52935	1	0.35699	0.333551
GOTERM_BP_DIRECT	GO:0046685~response to arsenic-containing substance	4	0.55325	0.0565242	P97571, Q3B7D0, P23562, P06214	710	25	20099	4.52935	1	0.35699	0.333551
GOTERM_BP_DIRECT	GO:0090201~negative regulation of release of cytochrome c from mitochondria	4	0.55325	0.0565242	P01186, P08025, P04041, P48679	710	25	20099	4.52935	1	0.35699	0.333551
GOTERM_BP_DIRECT	GO:0030301~cholesterol transport	4	0.55325	0.0565242	Q7TMA5, P04638, P04639, P18424	710	25	20099	4.52935	1	0.35699	0.333551
GOTERM_BP_DIRECT	GO:0097191~extrinsic apoptotic signaling pathway	6	0.829876	0.0566437	P17246, P35704, O88797, P11598, P08721, Q80WY6	710	59	20099	2.87883	1	0.357135	0.333686
GOTERM_BP_DIRECT	GO:0032755~positive regulation of interleukin-6 production	9	1.24481	0.0574575	P17246, P08592, P97840, P63159, Q63621, Q63313, Q06000	710	118	20099	2.15912	1	0.36165	0.337905
GOTERM_BP_DIRECT	GO:1900026~positive regulation of substrate adhesion-dependent cell spreading	5	0.691563	0.0597775	P04785, O88797, P04639, Q64610, Q6RUV5	710	42	20099	3.37005	1	0.374343	0.349764
GOTERM_BP_DIRECT	GO:0010951~negative regulation of endopeptidase activity	5	0.691563	0.0597775	P06238, Q9QX79, P04797, Q6P734, Q64268	710	42	20099	3.37005	1	0.374343	0.349764
GOTERM_BP_DIRECT	GO:0002027~regulation of heart rate	5	0.691563	0.0597775	P0DP30, P0DP31, P0DP29, P01015, P01179	710	42	20099	3.37005	1	0.374343	0.349764
GOTERM_BP_DIRECT	GO:1904707~positive regulation of vascular associated smooth muscle cell proliferation	6	0.829876	0.0600834	Q9WUQ1, P24594, P25095, P08025, P01015, P33436	710	60	20099	2.83085	1	0.37499	0.350369
GOTERM_BP_DIRECT	GO:0001558~regulation of cell growth	6	0.829876	0.0600834	P17246, P24594, P15473, Q9WVH8, P21744, P26051	710	60	20099	2.83085	1	0.37499	0.350369
GOTERM_BP_DIRECT	GO:0006874~intracellular calcium ion homeostasis	9	1.24481	0.062187	P02650, P17246, P38652, P09812, P50463, P97546, P08650, P08721	710	120	20099	2.12313	1	0.383543	0.35836
GOTERM_BP_DIRECT	GO:0141163~positive regulation of cAMP/PKA signal transduction	4	0.55325	0.062283	P08592, P30904, P31044, P10354	710	26	20099	4.35515	1	0.383543	0.35836
GOTERM_BP_DIRECT	GO:0045862~positive regulation of proteolysis	4	0.55325	0.062283	P45592, P63018	710	26	20099	4.35515	1	0.383543	0.35836
GOTERM_BP_DIRECT	GO:0007520~myoblast fusion	4	0.55325	0.062283	Q62812, P49134, Q07009, P97603	710	26	20099	4.35515	1	0.383543	0.35836
GOTERM_BP_DIRECT	GO:0006509~membrane protein ectodomain proteolysis	4	0.55325	0.062283	Q62812, D4AE41, P84586, Q10743, Q4V898	710	26	20099	4.35515	1	0.383543	0.35836
GOTERM_BP_DIRECT	GO:0071236~cellular response to antibiotic	4	0.55325	0.062283	P63255, P11232, P19356, P06761	710	26	20099	4.35515	1	0.383543	0.35836
GOTERM_BP_DIRECT	GO:0090026~positive regulation of monocyte chemotaxis	4	0.55325	0.062283	P08592, P63159	710	26	20099	4.35515	1	0.383543	0.35836
GOTERM_BP_DIRECT	GO:0071285~cellular response to lithium ion	4	0.55325	0.062283	P08010, Q9R0T4, P14942, P70623	710	26	20099	4.35515	1	0.383543	0.35836
GOTERM_BP_DIRECT	GO:0051881~regulation of mitochondrial membrane potential	5	0.691563	0.0641507	P62278, O88767, Q9Z0V6, P07632, Q6MG61	710	43	20099	3.29168	1	0.393734	0.367882
GOTERM_BP_DIRECT	GO:0048662~negative regulation of smooth muscle cell proliferation	5	0.691563	0.0641507	P02650, P24594, P23593, P15473, P01015	710	43	20099	3.29168	1	0.393734	0.367882
GOTERM_BP_DIRECT	GO:0002183~cytoplasmic translational initiation	3	0.414938	0.0648989	P81795, Q5RKI1	710	12	20099	7.07711	1	0.394402	0.368506
GOTERM_BP_DIRECT	GO:0006107~oxaloacetate metabolic process	3	0.414938	0.0648989	P13221, O88989, P16638	710	12	20099	7.07711	1	0.394402	0.368506
GOTERM_BP_DIRECT	GO:0042989~sequestering of actin monomers	3	0.414938	0.0648989	P63312, Q68FP1, P62329	710	12	20099	7.07711	1	0.394402	0.368506
GOTERM_BP_DIRECT	GO:0097720~calcineurin-mediated signaling	3	0.414938	0.0648989	P0DP30, P0DP31, P0DP29	710	12	20099	7.07711	1	0.394402	0.368506
GOTERM_BP_DIRECT	GO:0033151~V(D)J recombination	3	0.414938	0.0648989	P63159	710	12	20099	7.07711	1	0.394402	0.368506
GOTERM_BP_DIRECT	GO:0051128~regulation of cellular component organization	3	0.414938	0.0648989	Q64604, Q64605, Q10743	710	12	20099	7.07711	1	0.394402	0.368506
GOTERM_BP_DIRECT	GO:0045732~positive regulation of protein catabolic process	7	0.968188	0.0663186	Q99MH3, Q63515, P09527, Q63514, O35763, P46462, P82995	710	81	20099	2.44641	1	0.39463	0.368719
GOTERM_BP_DIRECT	GO:0001932~regulation of protein phosphorylation	7	0.968188	0.0663186	P42930, P04639, P08025, P25304, P04937, P16636, P13596	710	81	20099	2.44641	1	0.39463	0.368719
GOTERM_BP_DIRECT	GO:0010629~negative regulation of gene expression	22	3.04288	0.0673597	P02650, P26342, P97840, Q10743, Q05982, Q9QW30, P17246, P63245, P23928, O08775, P08592, P61980, O88767, P08025, O88600, P30904, P47820, Q9R1E9, P01015, P22985	710	418	20099	1.48992	1	0.39463	0.368719
GOTERM_BP_DIRECT	GO:0030837~negative regulation of actin filament polymerization	4	0.55325	0.0683023	P97571, Q9EPC6, Q3SWT0, P62963	710	27	20099	4.19384	1	0.39463	0.368719
GOTERM_BP_DIRECT	GO:0071305~cellular response to vitamin D	4	0.55325	0.0683023	Q9WUQ1, P49134, P11598, Q00918	710	27	20099	4.19384	1	0.39463	0.368719
GOTERM_BP_DIRECT	GO:1903077~negative regulation of protein localization to plasma membrane	4	0.55325	0.0683023	P17246, Q9R0T4, O88797, P11442	710	27	20099	4.19384	1	0.39463	0.368719
GOTERM_BP_DIRECT	GO:2000060~positive regulation of ubiquitin-dependent protein catabolic process	4	0.55325	0.0683023	P46462, P05371, O70593, Q5XIF4	710	27	20099	4.19384	1	0.39463	0.368719
GOTERM_BP_DIRECT	GO:0051511~negative regulation of unidimensional cell growth	2	0.276625	0.0693081	P45592	710	2	20099	28.3085	1	0.39463	0.368719
GOTERM_BP_DIRECT	GO:0044743~protein transmembrane import into intracellular organelle	2	0.276625	0.0693081	P63018	710	2	20099	28.3085	1	0.39463	0.368719
GOTERM_BP_DIRECT	GO:0051917~regulation of fibrinolysis	2	0.276625	0.0693081	Q07936, P26644	710	2	20099	28.3085	1	0.39463	0.368719
GOTERM_BP_DIRECT	GO:0060621~negative regulation of cholesterol import	2	0.276625	0.0693081	P06759, P04638	710	2	20099	28.3085	1	0.39463	0.368719
GOTERM_BP_DIRECT	GO:0071362~cellular response to ether	2	0.276625	0.0693081	P45592	710	2	20099	28.3085	1	0.39463	0.368719
GOTERM_BP_DIRECT	GO:1990832~slow axonal transport	2	0.276625	0.0693081	P63018	710	2	20099	28.3085	1	0.39463	0.368719
GOTERM_BP_DIRECT	GO:0010265~SCF complex assembly	2	0.276625	0.0693081	P97536, Q9R0L4	710	2	20099	28.3085	1	0.39463	0.368719
GOTERM_BP_DIRECT	GO:0071846~actin filament debranching	2	0.276625	0.0693081	Q63228, Q80T18	710	2	20099	28.3085	1	0.39463	0.368719
GOTERM_BP_DIRECT	GO:0061078~positive regulation of prostaglandin secretion involved in immune response	2	0.276625	0.0693081	P30904	710	2	20099	28.3085	1	0.39463	0.368719
GOTERM_BP_DIRECT	GO:1903919~negative regulation of actin filament severing	2	0.276625	0.0693081	P50463, Q62812	710	2	20099	28.3085	1	0.39463	0.368719
GOTERM_BP_DIRECT	GO:0034463~90S preribosome assembly	2	0.276625	0.0693081	P63174	710	2	20099	28.3085	1	0.39463	0.368719
GOTERM_BP_DIRECT	GO:1902998~positive regulation of neurofibrillary tangle assembly	2	0.276625	0.0693081	P02650, P05371	710	2	20099	28.3085	1	0.39463	0.368719
GOTERM_BP_DIRECT	GO:1903923~positive regulation of protein processing in phagocytic vesicle	2	0.276625	0.0693081	Q62812, Q68FP1	710	2	20099	28.3085	1	0.39463	0.368719
GOTERM_BP_DIRECT	GO:0034370~triglyceride-rich lipoprotein particle remodeling	2	0.276625	0.0693081	Q9QUH3, P04638	710	2	20099	28.3085	1	0.39463	0.368719
GOTERM_BP_DIRECT	GO:0061081~positive regulation of myeloid leukocyte cytokine production involved in immune response	2	0.276625	0.0693081	P30904	710	2	20099	28.3085	1	0.39463	0.368719
GOTERM_BP_DIRECT	GO:0001999~renal response to blood flow involved in circulatory renin-angiotensin regulation of systemic arterial blood pressure	2	0.276625	0.0693081	P29089, P01015	710	2	20099	28.3085	1	0.39463	0.368719
GOTERM_BP_DIRECT	GO:1904764~chaperone-mediated autophagy translocation complex disassembly	2	0.276625	0.0693081	P63018	710	2	20099	28.3085	1	0.39463	0.368719
GOTERM_BP_DIRECT	GO:0048685~negative regulation of collateral sprouting of intact axon in response to injury	2	0.276625	0.0693081	P08721	710	2	20099	28.3085	1	0.39463	0.368719
GOTERM_BP_DIRECT	GO:0001970~positive regulation of activation of membrane attack complex	2	0.276625	0.0693081	Q811M5, P01026	710	2	20099	28.3085	1	0.39463	0.368719
GOTERM_BP_DIRECT	GO:0061692~cellular detoxification of hydrogen peroxide	2	0.276625	0.0693081	P11232, P04762	710	2	20099	28.3085	1	0.39463	0.368719
GOTERM_BP_DIRECT	GO:0034445~negative regulation of plasma lipoprotein oxidation	2	0.276625	0.0693081	P14630, P02651	710	2	20099	28.3085	1	0.39463	0.368719
GOTERM_BP_DIRECT	GO:1905225~response to thyrotropin-releasing hormone	2	0.276625	0.0693081	Q8K3U6, P18292	710	2	20099	28.3085	1	0.39463	0.368719
GOTERM_BP_DIRECT	GO:1904592~positive regulation of protein refolding	2	0.276625	0.0693081	P63018	710	2	20099	28.3085	1	0.39463	0.368719
GOTERM_BP_DIRECT	GO:1905873~positive regulation of protein localization to cell leading edge	2	0.276625	0.0693081	P45592	710	2	20099	28.3085	1	0.39463	0.368719
GOTERM_BP_DIRECT	GO:0032572~response to menaquinone	2	0.276625	0.0693081	P30904	710	2	20099	28.3085	1	0.39463	0.368719
GOTERM_BP_DIRECT	GO:1905875~negative regulation of postsynaptic density organization	2	0.276625	0.0693081	P45592	710	2	20099	28.3085	1	0.39463	0.368719
GOTERM_BP_DIRECT	GO:1903027~regulation of opsonization	2	0.276625	0.0693081	Q63515, Q63514	710	2	20099	28.3085	1	0.39463	0.368719
GOTERM_BP_DIRECT	GO:0033206~meiotic cytokinesis	2	0.276625	0.0693081	Q4V7C7, Q5M7U6	710	2	20099	28.3085	1	0.39463	0.368719
GOTERM_BP_DIRECT	GO:0001869~negative regulation of complement activation, lectin pathway	2	0.276625	0.0693081	P06238, Q6P734	710	2	20099	28.3085	1	0.39463	0.368719
GOTERM_BP_DIRECT	GO:0032796~uropod organization	2	0.276625	0.0693081	Q62812, Q91ZN1	710	2	20099	28.3085	1	0.39463	0.368719
GOTERM_BP_DIRECT	GO:1902165~regulation of intrinsic apoptotic signaling pathway in response to DNA damage by p53 class mediator	2	0.276625	0.0693081	P61980	710	2	20099	28.3085	1	0.39463	0.368719
GOTERM_BP_DIRECT	GO:0009438~methylglyoxal metabolic process	2	0.276625	0.0693081	O88767, Q6P7Q4	710	2	20099	28.3085	1	0.39463	0.368719
GOTERM_BP_DIRECT	GO:0061481~response to TNF agonist	2	0.276625	0.0693081	P62909	710	2	20099	28.3085	1	0.39463	0.368719
GOTERM_BP_DIRECT	GO:2000784~positive regulation of establishment of cell polarity regulating cell shape	2	0.276625	0.0693081	P45592	710	2	20099	28.3085	1	0.39463	0.368719
GOTERM_BP_DIRECT	GO:0071345~cellular response to cytokine stimulus	6	0.829876	0.0710984	Q62952, Q99PF5, P61589, P19356, Q00495, P33436	710	63	20099	2.69604	1	0.404202	0.377662
GOTERM_BP_DIRECT	GO:0007626~locomotory behavior	9	1.24481	0.0723562	P01186, Q63228, P08592, P27605, P58751, Q63198, P68370, P25236, P07632	710	124	20099	2.05465	1	0.410721	0.383754
GOTERM_BP_DIRECT	GO:0048009~insulin-like growth factor receptor signaling pathway	7	0.968188	0.0728317	P16310, P24594, O08775, P08025, P01346, Q00495, Q91ZT1	710	83	20099	2.38746	1	0.412787	0.385684
GOTERM_BP_DIRECT	GO:0001701~in utero embryonic development	19	2.62794	0.0729957	P26342, P04764, Q62764, Q62812, P49134, Q9R0T4, Q10743, Q5U367, P13941, Q9QW30, Q811M5, Q6P6V0, P01946, Q7TMA5, O88797, P08650, P01346, P04692, P62961	710	351	20099	1.53237	1	0.413084	0.385962
GOTERM_BP_DIRECT	GO:0007157~heterophilic cell-cell adhesion via plasma membrane cell adhesion molecules	5	0.691563	0.0733833	P29534, Q9R172, O35112, P30836, Q9Z1Y3	710	45	20099	3.14538	1	0.414039	0.386854
GOTERM_BP_DIRECT	GO:0022604~regulation of cell morphogenesis	4	0.55325	0.0745744	P45592, P16975, Q6RUV5	710	28	20099	4.04406	1	0.414039	0.386854
GOTERM_BP_DIRECT	GO:0010613~positive regulation of cardiac muscle hypertrophy	4	0.55325	0.0745744	Q68FP1, P08025, P01015, P62775	710	28	20099	4.04406	1	0.414039	0.386854
GOTERM_BP_DIRECT	GO:0050778~positive regulation of immune response	4	0.55325	0.0745744	P20759, P07151, P30904	710	28	20099	4.04406	1	0.414039	0.386854
GOTERM_BP_DIRECT	GO:0033033~negative regulation of myeloid cell apoptotic process	3	0.414938	0.0749544	P30904, P26644	710	13	20099	6.53272	1	0.414039	0.386854
GOTERM_BP_DIRECT	GO:0008090~retrograde axonal transport	3	0.414938	0.0749544	P38650, P62628, P07632	710	13	20099	6.53272	1	0.414039	0.386854
GOTERM_BP_DIRECT	GO:1902166~negative regulation of intrinsic apoptotic signaling pathway in response to DNA damage by p53 class mediator	3	0.414938	0.0749544	P26051, P30904	710	13	20099	6.53272	1	0.414039	0.386854
GOTERM_BP_DIRECT	GO:0071243~cellular response to arsenic-containing substance	3	0.414938	0.0749544	Q9Z339, P32362, P19356	710	13	20099	6.53272	1	0.414039	0.386854
GOTERM_BP_DIRECT	GO:0090150~establishment of protein localization to membrane	3	0.414938	0.0749544	P0DP30, P0DP31, P0DP29	710	13	20099	6.53272	1	0.414039	0.386854
GOTERM_BP_DIRECT	GO:0002318~myeloid progenitor cell differentiation	3	0.414938	0.0749544	P63159	710	13	20099	6.53272	1	0.414039	0.386854
GOTERM_BP_DIRECT	GO:0010466~negative regulation of peptidase activity	3	0.414938	0.0749544	P01039, P14841, Q62894	710	13	20099	6.53272	1	0.414039	0.386854
GOTERM_BP_DIRECT	GO:0006910~phagocytosis, recognition	3	0.414938	0.0749544	P20759, P97710, Q4V885	710	13	20099	6.53272	1	0.414039	0.386854
GOTERM_BP_DIRECT	GO:0060056~mammary gland involution	3	0.414938	0.0749544	P97571, P24594, P13635	710	13	20099	6.53272	1	0.414039	0.386854
GOTERM_BP_DIRECT	GO:0032801~receptor catabolic process	3	0.414938	0.0749544	P97571, P17246, P0C0R5	710	13	20099	6.53272	1	0.414039	0.386854
GOTERM_BP_DIRECT	GO:0005513~detection of calcium ion	3	0.414938	0.0749544	P0DP30, P0DP31, P0DP29	710	13	20099	6.53272	1	0.414039	0.386854
GOTERM_BP_DIRECT	GO:0034374~low-density lipoprotein particle remodeling	3	0.414938	0.0749544	P02650, Q7TMA5, P04638	710	13	20099	6.53272	1	0.414039	0.386854
GOTERM_BP_DIRECT	GO:0001764~neuron migration	10	1.38313	0.0764661	P62260, Q3KRE8, P61589, P58751, P13941, P97603, P82995, P68370, P85108, Q6RUV5	710	147	20099	1.92574	1	0.42176	0.394068
GOTERM_BP_DIRECT	GO:0046427~positive regulation of receptor signaling pathway via JAK-STAT	6	0.829876	0.0790159	P07943, P0DP30, P16310, P0DP31, P09320, P0DP29	710	65	20099	2.61309	1	0.435175	0.406603
GOTERM_BP_DIRECT	GO:0048844~artery morphogenesis	4	0.55325	0.0810914	P02650, Q9R172, Q7TMA5, P35444	710	29	20099	3.90461	1	0.444621	0.415428
GOTERM_BP_DIRECT	GO:0090023~positive regulation of neutrophil chemotaxis	4	0.55325	0.0810914	P30836, P49744, Q63313, Q6RUV5	710	29	20099	3.90461	1	0.444621	0.415428
GOTERM_BP_DIRECT	GO:0000463~maturation of LSU-rRNA from tricistronic rRNA transcript (SSU-rRNA, 5.8S rRNA, LSU-rRNA)	4	0.55325	0.0810914	P05426, P17078	710	29	20099	3.90461	1	0.444621	0.415428
GOTERM_BP_DIRECT	GO:0006511~ubiquitin-dependent protein catabolic process	14	1.93638	0.0839138	P60901, F1LMZ8, P62839, P46462, Q5U300, Q9EQX9, P18420, P18422, Q00981, P61078, P17220, P48004, P21670	710	240	20099	1.65133	1	0.459415	0.429251
GOTERM_BP_DIRECT	GO:1900272~negative regulation of long-term synaptic potentiation	3	0.414938	0.0854644	P02650, P08592, P13852	710	14	20099	6.0661	1	0.461084	0.43081
GOTERM_BP_DIRECT	GO:0006739~NADP metabolic process	3	0.414938	0.0854644	O88989, P05370, P13697	710	14	20099	6.0661	1	0.461084	0.43081
GOTERM_BP_DIRECT	GO:0071803~positive regulation of podosome assembly	3	0.414938	0.0854644	O35763, P61589, P85845	710	14	20099	6.0661	1	0.461084	0.43081
GOTERM_BP_DIRECT	GO:2001028~positive regulation of endothelial cell chemotaxis	3	0.414938	0.0854644	P42930, O08775, P62329	710	14	20099	6.0661	1	0.461084	0.43081
GOTERM_BP_DIRECT	GO:0048680~positive regulation of axon regeneration	3	0.414938	0.0854644	P30904, P23785	710	14	20099	6.0661	1	0.461084	0.43081
GOTERM_BP_DIRECT	GO:2000562~negative regulation of CD4-positive, alpha-beta T cell proliferation	3	0.414938	0.0854644	P26051, P97840, P47967	710	14	20099	6.0661	1	0.461084	0.43081
GOTERM_BP_DIRECT	GO:0046622~positive regulation of organ growth	3	0.414938	0.0854644	Q62764, P01346, P01015	710	14	20099	6.0661	1	0.461084	0.43081
GOTERM_BP_DIRECT	GO:0006002~fructose 6-phosphate metabolic process	3	0.414938	0.0854644	P47858, Q6P6V0, P30835	710	14	20099	6.0661	1	0.461084	0.43081
GOTERM_BP_DIRECT	GO:0045063~T-helper 1 cell differentiation	3	0.414938	0.0854644	P63159	710	14	20099	6.0661	1	0.461084	0.43081
GOTERM_BP_DIRECT	GO:1901796~regulation of signal transduction by p53 class mediator	3	0.414938	0.0854644	P62914, P09895	710	14	20099	6.0661	1	0.461084	0.43081
GOTERM_BP_DIRECT	GO:0050832~defense response to fungus	4	0.55325	0.087845	Q99MH3, P17246, Q99PS8, B0BNA5	710	30	20099	3.77446	1	0.46914	0.438337
GOTERM_BP_DIRECT	GO:0001774~microglial cell activation	4	0.55325	0.087845	P08592, P05371, Q00495, P31720	710	30	20099	3.77446	1	0.46914	0.438337
GOTERM_BP_DIRECT	GO:0031116~positive regulation of microtubule polymerization	4	0.55325	0.087845	P62909, Q9WTT6, Q6RUV5	710	30	20099	3.77446	1	0.46914	0.438337
GOTERM_BP_DIRECT	GO:0010038~response to metal ion	4	0.55325	0.087845	P12928, P08010, P14942, P19356, P06214	710	30	20099	3.77446	1	0.46914	0.438337
GOTERM_BP_DIRECT	GO:0055001~muscle cell development	4	0.55325	0.087845	Q00981, P35444, P16636, D3ZHA0	710	30	20099	3.77446	1	0.46914	0.438337
GOTERM_BP_DIRECT	GO:1900016~negative regulation of cytokine production involved in inflammatory response	4	0.55325	0.087845	P23593, P18292, P97710, Q6IE51	710	30	20099	3.77446	1	0.46914	0.438337
GOTERM_BP_DIRECT	GO:0010906~regulation of glucose metabolic process	4	0.55325	0.087845	Q03191, P15473, P21744, Q5M8C6	710	30	20099	3.77446	1	0.46914	0.438337
GOTERM_BP_DIRECT	GO:0042254~ribosome biogenesis	5	0.691563	0.0884148	P09606, P19945, P62859	710	48	20099	2.9488	1	0.470825	0.439911
GOTERM_BP_DIRECT	GO:0071548~response to dexamethasone	5	0.691563	0.0884148	P00787, P22355, P47820, P11232, P02773	710	48	20099	2.9488	1	0.470825	0.439911
GOTERM_BP_DIRECT	GO:0008380~RNA splicing	10	1.38313	0.0897206	P61980, D4AE41, P84586, Q99PF5, Q4V898, P62961, P63018, Q9EPH8	710	152	20099	1.8624	1	0.477092	0.445767
GOTERM_BP_DIRECT	GO:0043408~regulation of MAPK cascade	5	0.691563	0.0937303	O08775, P10960, P30121, Q00495, Q91ZT1	710	49	20099	2.88862	1	0.496985	0.464354
GOTERM_BP_DIRECT	GO:0044344~cellular response to fibroblast growth factor stimulus	5	0.691563	0.0937303	P48508, P26051, Q99372, P31000, P02454	710	49	20099	2.88862	1	0.496985	0.464354
GOTERM_BP_DIRECT	GO:0050730~regulation of peptidyl-tyrosine phosphorylation	4	0.55325	0.0948263	P28576, Q99PS8, P08592, P13852	710	31	20099	3.6527	1	0.50136	0.468442
GOTERM_BP_DIRECT	GO:0061003~positive regulation of dendritic spine morphogenesis	4	0.55325	0.0948263	P30009, Q4V7C7, Q5M7U6, P58751	710	31	20099	3.6527	1	0.50136	0.468442
GOTERM_BP_DIRECT	GO:0071316~cellular response to nicotine	3	0.414938	0.0963844	P05539, P07151, P08025	710	15	20099	5.66169	1	0.505267	0.472092
GOTERM_BP_DIRECT	GO:0043518~negative regulation of DNA damage response, signal transduction by p53 class mediator	3	0.414938	0.0963844	P26051, P30904	710	15	20099	5.66169	1	0.505267	0.472092
GOTERM_BP_DIRECT	GO:0006098~pentose-phosphate shunt	3	0.414938	0.0963844	P85971, P05370, P50137	710	15	20099	5.66169	1	0.505267	0.472092
GOTERM_BP_DIRECT	GO:0046598~positive regulation of viral entry into host cell	3	0.414938	0.0963844	P04785, P97840, P11762	710	15	20099	5.66169	1	0.505267	0.472092
GOTERM_BP_DIRECT	GO:0006536~glutamate metabolic process	3	0.414938	0.0963844	P13221, P09606, P48508	710	15	20099	5.66169	1	0.505267	0.472092
GOTERM_BP_DIRECT	GO:0031529~ruffle organization	3	0.414938	0.0963844	P04692, Q00495, Q6RUV5	710	15	20099	5.66169	1	0.505267	0.472092
GOTERM_BP_DIRECT	GO:0030855~epithelial cell differentiation	8	1.1065	0.0977331	Q6IFW6, P38983, P47727, Q5XFX0, P00787, P16617, P09117	710	111	20099	2.04025	1	0.511613	0.478021
GOTERM_BP_DIRECT	GO:0060048~cardiac muscle contraction	5	0.691563	0.0991933	P50463, P62738, P68035, P27768, P04692, P02600	710	50	20099	2.83085	1	0.513624	0.4799
GOTERM_BP_DIRECT	GO:0001654~eye development	5	0.691563	0.0991933	P04916, P63159, P14841	710	50	20099	2.83085	1	0.513624	0.4799
GOTERM_BP_DIRECT	GO:0001974~blood vessel remodeling	5	0.691563	0.0991933	P26342, P50463, P08025, P47853, Q99372	710	50	20099	2.83085	1	0.513624	0.4799
